# Supplementary material for: Hematin supported on Colour Catcher®: a biodegradable heterogeneous catalyst for halogen-free CO2 cycloadditions
Source: Royal Society of Chemistry journal article supplement (doi:10.1039/d4cy00658e), 2024-01-01
Supplement: d4cy00658e1.pdf [file d4cy00658e1.pdf]

*Supporting Information of*

# Hematin supported on Colour Catcher®: Biodegradable Heterogeneous Catalyst for Halogen-free CO<sub>2</sub> Cycloadditions

Caterina Damiano,<sup>[a]</sup> Alessia Fata,<sup>[a]</sup> Matteo Cavalleri,<sup>[a]</sup> Gabriele Manca\*<sup>[b]</sup> and Emma Gallo\*<sup>[a]</sup>

---

[a] Dr. C. Damiano, A. Fata, M. Cavalleri, Prof. E. Gallo  
Department of Chemistry  
University of Milan  
Via Golgi 19, 20133 Milan (Italy)  
E-mail: [emma.gallo@unimi.it](mailto:emma.gallo@unimi.it); <https://sites.unimi.it/emmagallogroup/>

[b] Dr. G. Manca  
Istituto di Chimica dei Composti Organo Metallici  
ICCOM-CNR  
Via Madonna del Piano 10, 50019 Sesto Fiorentino (Italy)  
E-mail: [gmanca@iccom.cnr.it](mailto:gmanca@iccom.cnr.it)

## Tables of contents

|     |                                                                             |     |
|-----|-----------------------------------------------------------------------------|-----|
| 1.  | General methods                                                             | S1  |
| 2.  | Optimization of the loading of <b>3</b> onto CC sheet                       | S1  |
| 3.  | Characterization of <b>3@CC</b>                                             | S3  |
| 4.  | Synthesis of cyclic carbonates                                              | S6  |
| 5.  | Synthesis of oxazolidin-2-ones                                              | S9  |
| 6.  | Recycling test                                                              | S13 |
| 7.  | Characterization of <b>3@CC</b> after the catalytic synthesis of <b>14a</b> | S13 |
| 8.  | UV-Visible studies on the aziridine/epoxide coordination                    | S16 |
| 9.  | <sup>1</sup> H and <sup>13</sup> C NMR spectra                              | S17 |
| 10. | Computational data                                                          | S36 |
| 11. | References                                                                  | S57 |

## 1. General methods

All air- and moisture-sensitive manipulations were carried out with standard Schlenk techniques under nitrogen atmosphere. Unless otherwise specified, DCE was distilled over calcium hydride and kept under nitrogen. *N*-alkyl aziridines were synthesized by following already reported procedures.<sup>[1]</sup> All the other starting materials were commercial products and used as received. NMR spectra were recorded at room temperature either on a Bruker Avance 300-DRX, operating at 300 MHz for <sup>1</sup>H and at 75 MHz for <sup>13</sup>C or on a Bruker Avance 400-DRX spectrometers, operating at 400 MHz for <sup>1</sup>H and at 101 MHz for <sup>13</sup>C. Chemical shifts (ppm) are reported relative to TMS. <sup>1</sup>H NMR signals of the compounds described in the following were attributed by 2D NMR techniques. Assignments of the resonances in <sup>13</sup>C NMR were made by using the APT pulse sequence, HSQC and HMBC techniques. Infrared spectra were recorded on a Varian Scimitar FTS 1000 spectrophotometer. UV-Visible spectra were recorded on an Agilent 8453E instrument. UV-Visible spectra of CC strips were recorded on a Cary 100 spectrophotometer. Morphology and chemical compositions were studied using a Scanning Electron Microscope (SEM) equipped with energy-dispersive X-ray microanalysis (EDX) by using a Hitachi TM 1000 SEM/EDX. TGA analyses were recorded by using a Perkin Elmer TGA 7 Thermogravimetric Analyzer. ICP analyses were performed by using a PerkinElmer Optima 8000 ICP-OES instrument. Mass spectra were recorded in the analytical laboratories of Milan University.

## 2. Optimization of the loading of **3** onto CC sheet

**1** (65.0 mg,  $1.00 \times 10^{-4}$  mol) was dissolved in 100.0 mL of NaOH 0.1 M and the mixture was stirred at room temperature until the complete dissolution of the starting hemin. The obtained solution ( $[\mathbf{3}] = 1.00 \times 10^{-3}$  M) was then placed in a coded test tube and 25 cm<sup>2</sup> of Colour Catcher® were immersed into the **3**-containing solution. The decrease in the concentration of **3** was monitored using UV-visible spectroscopy. The absorption spectrum of the **3**-containing solution, appropriately diluted by a factor of 100, was acquired at various immersion times and the resulting absorbance values were plotted as a function of time, as shown below.

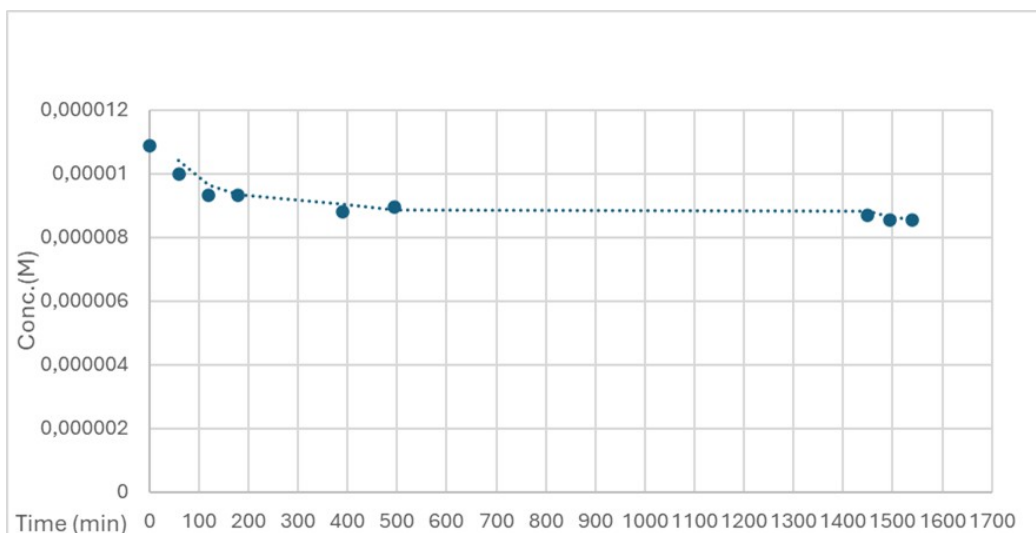

| ENTRY | abs     | Concentration (M) | TIME (min) |
|-------|---------|-------------------|------------|
| 0     | 0,59013 | 1,08668E-05       | 0          |
| 1     | 0,54188 | 9,97827E-06       | 60         |
| 2     | 0,5064  | 9,32494E-06       | 120        |
| 3     | 0,50619 | 9,32107E-06       | 180        |
| 4     | 0,47695 | 8,78264E-06       | 390        |
| 5     | 0,48674 | 8,96291E-06       | 495        |
| 6     | 0,47216 | 8,69444E-06       | 1450       |
| 7     | 0,46433 | 8,55025E-06       | 1495       |
| 8     | 0,46362 | 8,53718E-06       | 1540       |

**Figure S1:** Variation of concentration of **3** in function of time.

### 3. Characterization of 3@CC

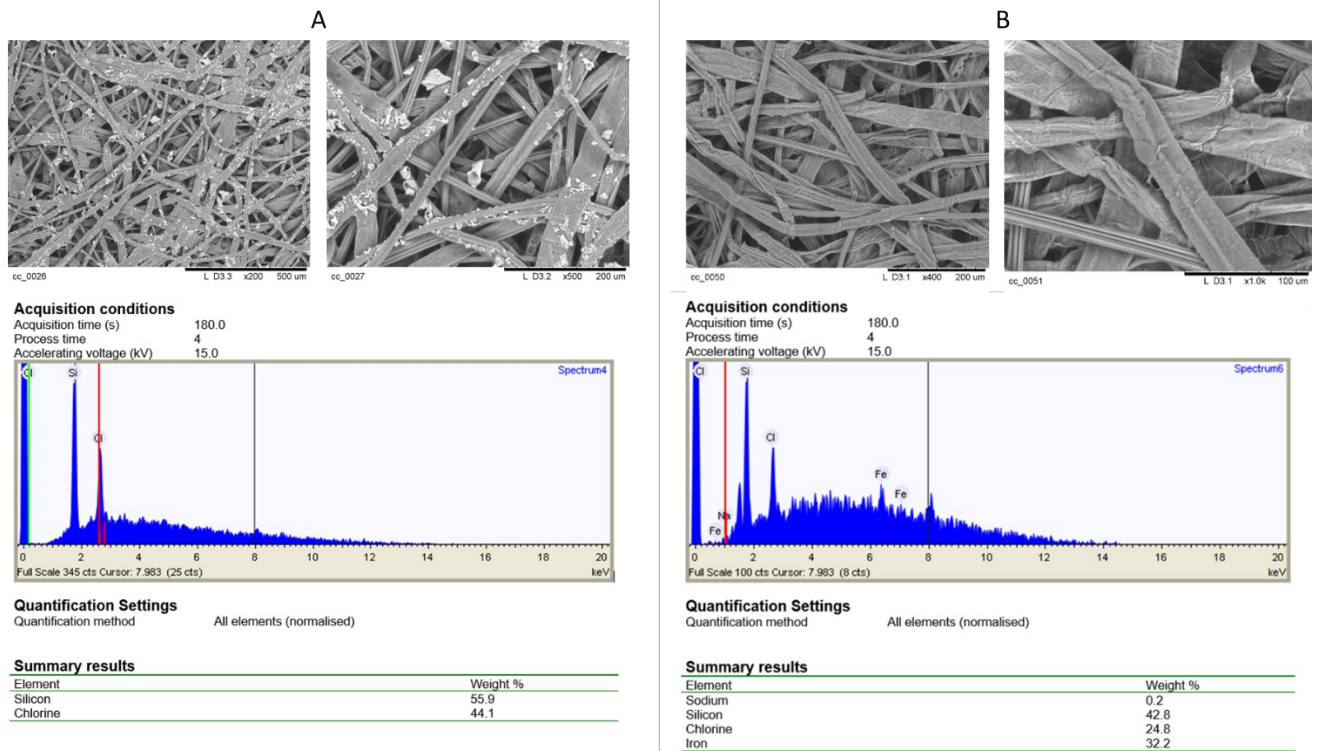

Figure S2: SEM images and EDX analysis of CC (A) and 3@CC 0.054 mg/cm<sup>2</sup> (B).

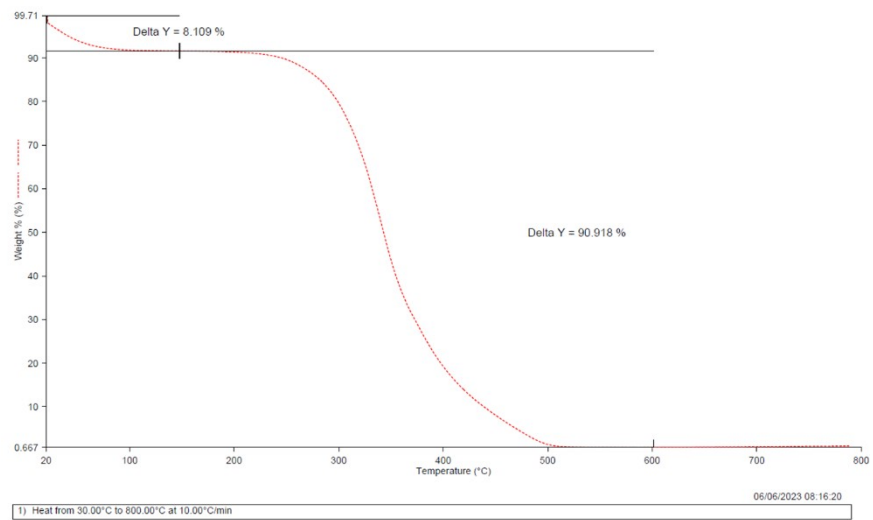

Figure S3: TGA analysis of 3@CC 0.054 mg/cm<sup>2</sup>.

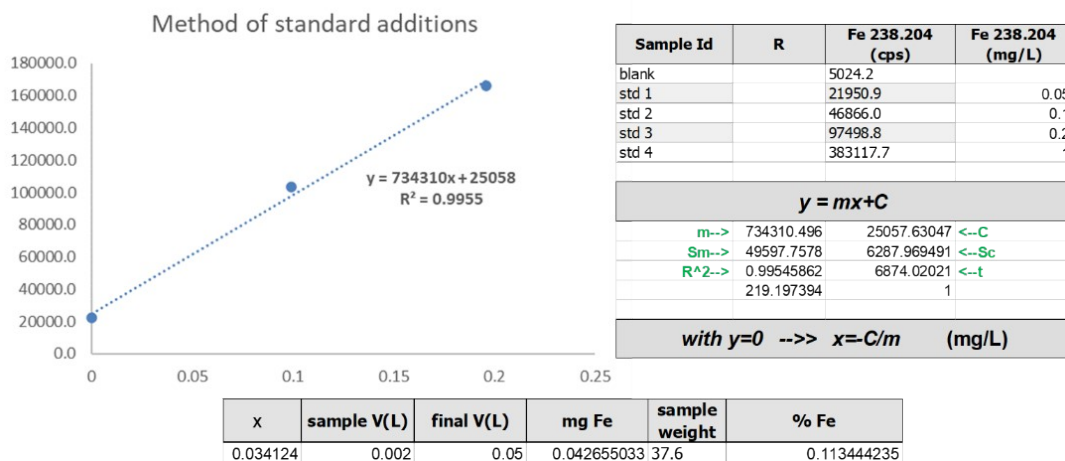

Figure S4: ICP-OES analysis of **3@CC** 0.054 mg/cm<sup>2</sup>.

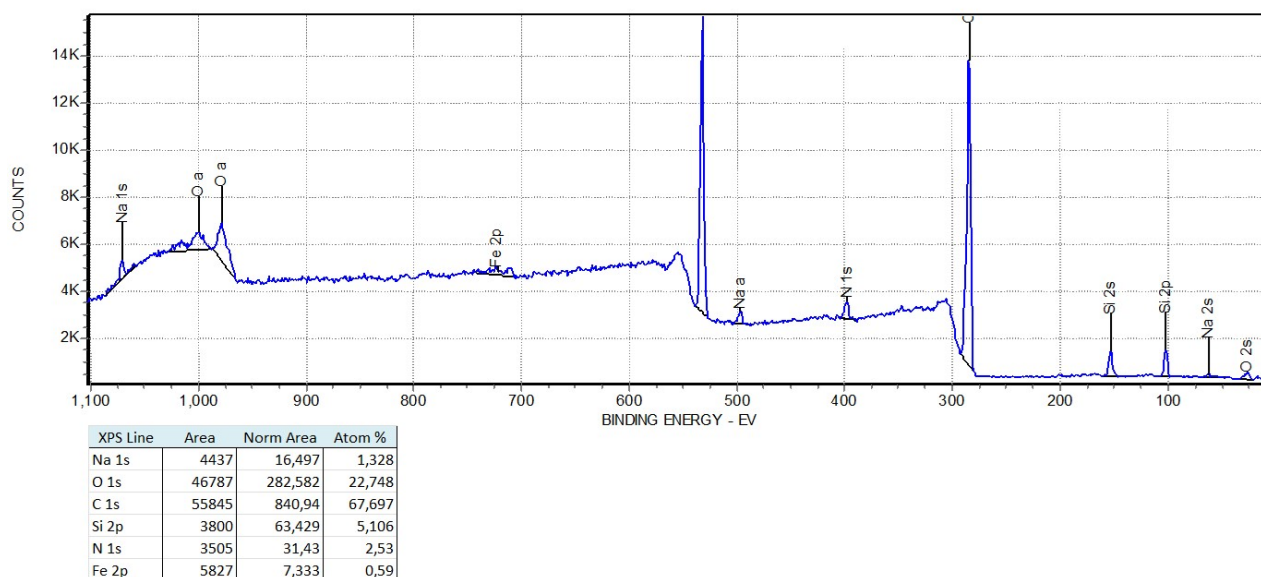

Figure S5: XPS analysis of **3@CC** 0.054 mg/cm<sup>2</sup>.

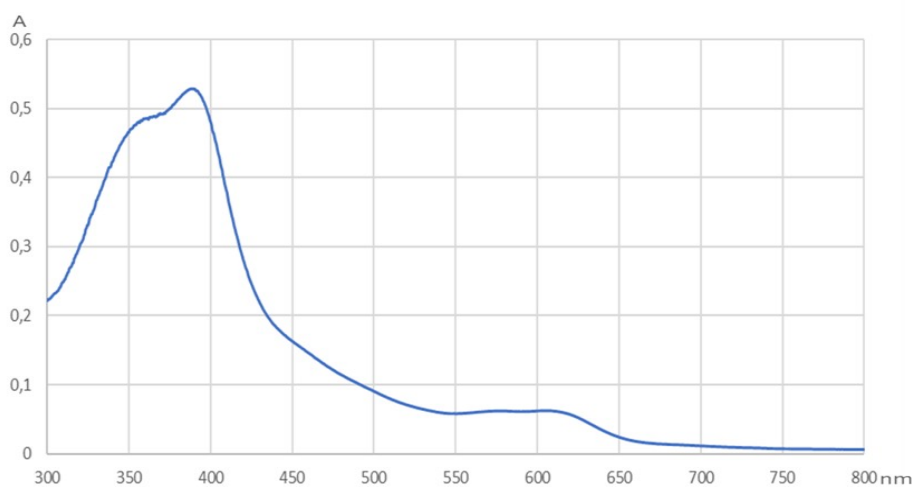

Figure S6: UV/visible spectrum of **3@CC** (catalytic loading = 0.054 mg/cm<sup>2</sup>).

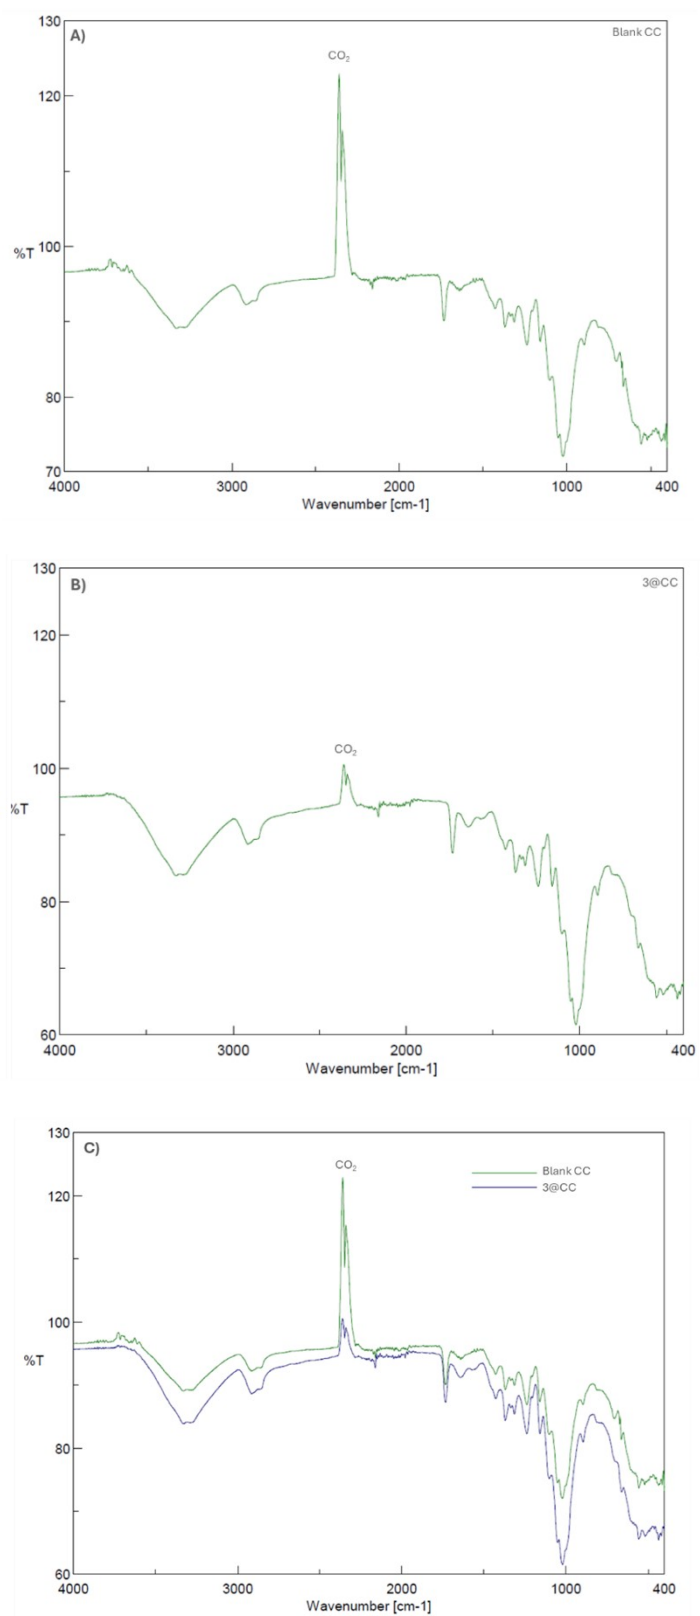

**Figure S7:** ATR spectra of porphyrin-free Colour Catcher® (A), 3@CC (catalytic loading = 0.054 mg/cm<sup>2</sup>) (B) and superimposed spectrum of A and B (C).

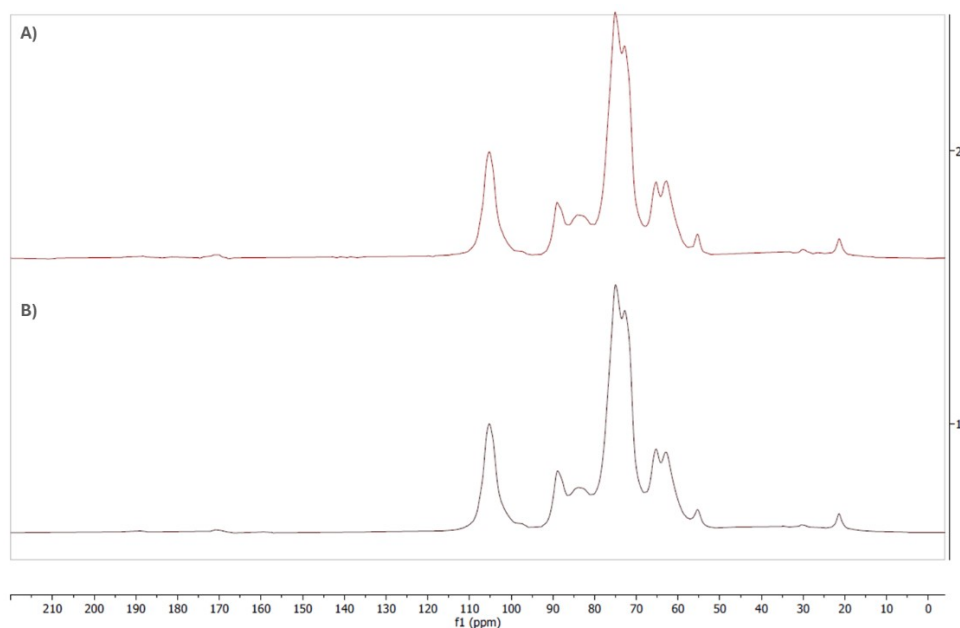

**Figure S8:** CPMAS spectra of porphyrin-free Colour Catcher® (A) and **3@CC** (catalytic loading = 0.054 mg/cm<sup>2</sup>) (B).

#### 4. Synthesis of cyclic carbonates

##### Synthesis of 4-phenyl-1,3-dioxolan-2-one (**4**)

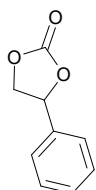

The general catalytic procedure was followed by using styrene oxide as the reagent (0.318 mL) to obtain a yellowish oil as the product (*Method A*: 96% yield; *Method B*: 94% yield; *Method C*: 40% yield). Collected data are in accordance with those reported in literature. [2]

<sup>1</sup>H NMR (400 MHz, CDCl<sub>3</sub>) δ 7.37 – 7.30 (m, 5H), 4.79 (dd, *J* = 8.4, 3.4 Hz, 1H), 3.71 (dd, *J* = 11.5, 3.5 Hz, 1H), 3.63 ppm (dd, *J* = 11.5, 8.3 Hz, 1H). <sup>13</sup>C NMR (101 MHz, CDCl<sub>3</sub>) δ 140.51, 128.51, 127.93, 126.11, 74.73, 68.03 ppm. LR-MS (ESI) *m/z* calcd. for (C<sub>9</sub>H<sub>8</sub>O<sub>3</sub>): 164.05, found 165.39 [M+H]<sup>+</sup>.

##### Synthesis of 4-(chloromethyl)-1,3-dioxolan-2-one (**5**)

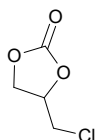

*Method B* of the general catalytic procedure was followed by using epichlorohydrin as the reagent (0.144 mL) to obtain a yellowish oil as the product (100% yield). Collected data are in accordance with those reported in literature. [3]

$^1\text{H}$  NMR (400 MHz,  $\text{CDCl}_3$ )  $\delta$  5.02 – 4.97 (m, 1H), 4.57 (t,  $J$  = 8.6 Hz, 1H), 4.38 – 4.35 (m, 1H), 3.81 (dd,  $J$  = 12.4, 4.6 Hz, 1H), 3.71 ppm (dd,  $J$  = 12.3, 3.6 Hz, 1H).  $^{13}\text{C}$  NMR (101 MHz,  $\text{CDCl}_3$ )  $\delta$  154.57, 74.57, 67.00, 44.21 ppm. LR-MS (ESI)  $m/z$  calcd. for ( $\text{C}_4\text{H}_5\text{ClO}_3$ ): 135.99, found 156.08  $[\text{M}+\text{Na}]^+$ .

#### Synthesis of 4-ethyl-1,3-dioxolan-2-one (6)

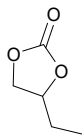

*Method B* of the general catalytic procedure was followed by using 1,2-epoxybutane as the reagent (0.160 mL) to obtain a yellowish oil as the product (75% yield). Collected data are in accordance with those reported in literature.<sup>[3]</sup>

$^1\text{H}$  NMR (400 MHz,  $\text{CDCl}_3$ )  $\delta$  4.68 – 4.62 (m, 1H), 4.50 (t,  $J$  = 8.2 Hz, 1H), 4.05 (dd,  $J$  = 8.5, 6.9 Hz, 1H), 1.83 – 1.66 (m, 2H), 0.98 ppm (t,  $J$  = 7.4 Hz, 3H).  $^{13}\text{C}$  NMR (101 MHz,  $\text{CDCl}_3$ )  $\delta$  155.21, 78.10, 69.06, 26.83, 8.40 ppm. LR-MS (ESI)  $m/z$  calcd. for ( $\text{C}_5\text{H}_8\text{O}_3$ ): 116.05, found 117.47  $[\text{M}+\text{H}]^+$ .

#### Synthesis of 4-butyl-1,3-dioxolan-2-one (7)

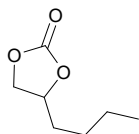

*Method B* of the general catalytic procedure was followed by using 1,2-epoxyhexane as the reagent (0.333 mL) to obtain a yellowish oil as the product (75% yield). Collected data are in accordance with those reported in literature.<sup>[2]</sup>

$^1\text{H}$  NMR (400 MHz,  $\text{CDCl}_3$ )  $\delta$  4.69 – 4.62 (m, 1H), 4.50 – 4.46 (pst,  $J$  = 8.4 Hz, 1H), 4.01 (dd,  $J$  = 8.5, 7.1 Hz, 1H), 1.79 – 1.53 (m, 2H), 1.49 – 1.24 (m, 4H), 0.85 ppm (t,  $J$  = 7.2 Hz, 3H).  $^{13}\text{C}$  NMR (101 MHz,  $\text{CDCl}_3$ )  $\delta$  155.18, 77.16, 69.34, 33.36, 26.40, 22.22, 13.69 ppm. LR-MS (ESI)  $m/z$  calcd. for ( $\text{C}_7\text{H}_{12}\text{O}_3$ ): 144.08 found 145.62  $[\text{M}+\text{H}]^+$ .

#### Synthesis of 4,4-dimethyl-1,3-dioxolan-2-one (8)

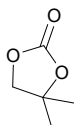

*Method B* of the general catalytic procedure was followed by using 2,2-dimethyloxirane as the reagent (0.245 mL) to obtain a yellowish oil as the product (100% yield). Collected data are in accordance with those reported in literature.<sup>[2]</sup>

$^1\text{H}$  NMR (400 MHz,  $\text{CDCl}_3$ )  $\delta$  4.14 (s, 2H), 1.50 ppm (s, 6H).  $^{13}\text{C}$  NMR (101 MHz,  $\text{CDCl}_3$ )  $\delta$  154.65, 81.80, 75.32, 25.91 ppm. LR-MS (ESI)  $m/z$  calcd. for ( $\text{C}_5\text{H}_8\text{O}_3$ ): 116.05, found 139.48  $[\text{M}+\text{Na}]^+$ .



### Synthesis of 4-((2-ethylhexyl)oxy)methyl)-1,3-dioxolan-2-one (9)

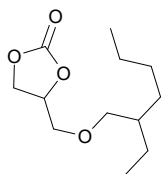

*Method B* of the general catalytic procedure was followed by using 2-ethylhexyl-glycidylether as the reagent (0.577 mL) to obtain a yellowish oil as the product (35% yield). Collected data are in accordance with those reported in literature.<sup>[4]</sup>

<sup>1</sup>H NMR (400 MHz, CDCl<sub>3</sub>) δ 4.81 – 4.76 (m, 1H), 4.46 (t, *J* = 8.4 Hz, 1H), 4.35 (dd, *J* = 8.3, 5.9 Hz, 1H), 3.63 (ddd, *J* = 11.1, 3.5, 2.2 Hz, 1H), 3.54 (ddd, *J* = 11.2, 3.5, 2.2 Hz, 2H), 3.36 (dd, *J* = 5.8, 2.0 Hz, 1H), 1.50 – 1.44 (m, 1H), 1.36 – 1.20 (m, 8H), 0.87 – 0.81 ppm (m, 6H). <sup>13</sup>C NMR (101 MHz, CDCl<sub>3</sub>) δ 155.11, 75.27, 74.65, 70.08, 66.08, 39.54, 30.39, 29.00, 23.72, 22.95, 13.98, 10.98 ppm. LR-MS (ESI) *m/z* calcd. for (C<sub>12</sub>H<sub>22</sub>O<sub>4</sub>): 230.15, found 253.22 [M+Na]<sup>+</sup>.

### Synthesis of 4-((allyloxy)methyl)-1,3-dioxolan-2-one (10)

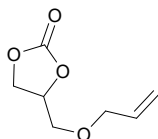

*Method B* of the general catalytic procedure was followed by using allyl-glycidylether as the reagent (0.211 mL) to obtain a yellowish oil as the product (98% yield). Collected data are in accordance with those reported in literature.<sup>[2]</sup>

<sup>1</sup>H NMR (400 MHz, CDCl<sub>3</sub>) δ 5.85 – 5.78 (m, 1H), 5.29 – 5.17 (m, 1H), 4.82 (dq, *J* = 7.9, 3.7 Hz, 1H), 4.52 – 4.47 (m, 1H), 4.39 – 4.35 (m, 1H), 4.03 (dd, *J* = 5.6, 1.4 Hz, 2H), 3.71 – 3.66 (m, 1H), 3.62 – 3.57 ppm (m, 1H). <sup>13</sup>C NMR (101 MHz, CDCl<sub>3</sub>) δ 155.07, 133.75, 117.78, 75.20, 72.49, 68.88, 66.26 ppm. LR-MS (ESI) *m/z* calcd. for (C<sub>7</sub>H<sub>10</sub>O<sub>4</sub>): 158.06 found 173.29 [M+Na]<sup>+</sup>.

### Synthesis of 4-(phenoxymethyl)-1,3-dioxolan-2-one (11)

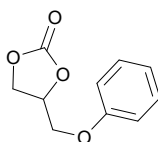

*Method B* of the general catalytic procedure was followed by using glycidyl-phenylether as the reagent (0.374 mL) to obtain a white solid as the product (74% yield). Collected data are in accordance with those reported in literature.<sup>[4]</sup>

<sup>1</sup>H NMR (400 MHz, CDCl<sub>3</sub>) δ 7.35 – 7.31 (m, 2H), 7.04 (t, *J* = 7.4 Hz, 1H), 6.93 (d, *J* = 7.7 Hz, 2H), 5.08 – 5.02 (m, 1H), 4.64 (t, *J* = 8.4 Hz, 1H), 4.57 – 4.54 (m, 1H), 4.26 (dd, *J* = 10.6, 4.3 Hz, 1H), 4.17 ppm (dd, *J* = 10.6, 3.6 Hz, 1H). <sup>13</sup>C NMR (101 MHz, CDCl<sub>3</sub>) δ 157.77, 154.66, 129.75, 122.03, 114.60, 74.12, 66.92, 66.27 ppm. LR-MS (ESI) *m/z* calcd. for (C<sub>10</sub>H<sub>10</sub>O<sub>4</sub>): 194.06, found 217.26 [M+Na]<sup>+</sup>.

### Synthesis of 4-((o-tolyloxy)methyl)-1,3-dioxolan-2-one (12)

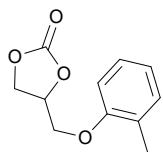

*Method B* of the general catalytic procedure was followed by using glycidyl-2-methylphenylether as the reagent (0.420 mL) to obtain a white solid as the product (45% yield). Collected data are in accordance with those reported in literature.<sup>[4]</sup>

<sup>1</sup>H NMR (400 MHz, CDCl<sub>3</sub>) δ 7.20 – 7.17 (m, 2H), 6.97 – 6.93 (m, 1H), 6.81 (d, *J* = 8.3 Hz, 1H), 5.10 – 5.04 (d, *J* = 20.5 Hz, 1H), 4.67 – 4.58 (d, *J* = 36.5 Hz, 2H), 4.28 (dd, *J* = 10.6, 3.6 Hz, 1H), 4.16 (dd, *J* = 10.7, 3.1 Hz, 1H), 2.24 ppm (s, 3H). <sup>13</sup>C NMR (101 MHz, CDCl<sub>3</sub>) δ 155.78, 154.77, 131.11, 126.90, 121.66, 110.88, 74.22, 67.05, 66.25, 15.96 ppm. LR-MS (ESI) *m/z* calcd. for (C<sub>11</sub>H<sub>12</sub>O<sub>4</sub>): 208.07, found 209.58 [M+H]<sup>+</sup>.

### Synthesis of 4-((benzyloxy)methyl)-1,3-dioxolan-2-one (13)

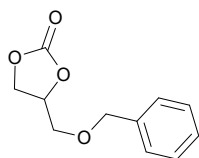

*Method B* of the general catalytic procedure was followed by using 2-(benzyloxy)methyloxirane as the reagent (0.424 mL) to obtain a white solid as the product (72% yield). Collected data are in accordance with those reported in literature.<sup>[4]</sup>

<sup>1</sup>H NMR (400 MHz, CDCl<sub>3</sub>) δ 7.41 – 7.32 (d, *J* = 9.8 Hz, 1H), 4.86 – 4.80 (m, 1H), 4.66 – 4.57 (m, 2H), 4.49 (t, *J* = 8.4 Hz, 1H), 4.40 (dd, *J* = 8.4, 6.0 Hz, 1H), 3.73 (dd, *J* = 10.9, 4.0 Hz, 1H), 3.64 ppm (dd, *J* = 11.0, 3.8 Hz, 1H). <sup>13</sup>C NMR (101 MHz, CDCl<sub>3</sub>) δ 154.97, 137.11, 128.60, 128.10, 127.77, 75.04, 73.72, 68.87, 66.32 ppm. LR-MS (ESI) *m/z* calcd. for (C<sub>11</sub>H<sub>12</sub>O<sub>4</sub>): 208.07, found 231.37 [M+Na]<sup>+</sup>.

## 5. Synthesis of *N*-alkyl oxazolidin-2-ones

### Synthesis of 3-butyl-5-phenyloxazolidin-2-one (14)

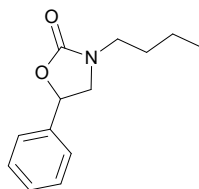

The general catalytic procedure was followed by using 1-butyl-2-phenyl aziridine as the reagent (0.194 mL) to obtain a yellowish oil as the product (*Method A*: 95% yield, A/B = 99:1; *Method B*: 80% yield, A/B = 99:1; *Method C*: 68% yield, A/B = 96:4; *Method D*: 70% yield, A/B = 96:4;). Collected data are in accordance with those reported in literature.<sup>[5]</sup>

$^1\text{H}$  NMR (400 MHz,  $\text{CDCl}_3$ )  $\delta$  7.34 – 7.24 (m, 5H), 5.39 (pt,  $J = 8.0$  Hz, 1H), 3.83 (pt,  $J = 8.8$  Hz, 1H), 3.34 (pt,  $J = 8.0$  Hz, 1H), 3.29 – 3.13 (m, 2H), 1.51 – 1.41 (m, 2H), 1.33 – 1.23 (m, 2H), 0.86 ppm (t,  $J = 6.8$  Hz, 3H).  $^{13}\text{C}$  NMR (101 MHz,  $\text{CDCl}_3$ )  $\delta$  139.42, 129.40, 129.26, 126.00, 74.81, 66.81, 52.67, 44.42, 29.92, 20.34, 14.20 ppm. LR-MS (ESI)  $m/z$  calcd. for ( $\text{C}_{13}\text{H}_{17}\text{NO}_2$ ): 219.13, found 220.19  $[\text{M}+\text{H}]^+$ .

### Synthesis of 3-isobutyl-5-phenyloxazolidin-2-one (15)

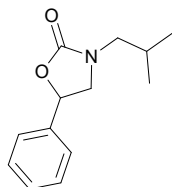

*Method D* of the general catalytic procedure was followed by using 1-isobutyl-2-phenyl aziridine as the reagent (0.195 mL) to obtain a yellowish oil as the product (56% yield, A/B = 98:2). Collected data are in accordance with those reported in literature.<sup>[3]</sup>

$^1\text{H}$  NMR (400 MHz,  $\text{CDCl}_3$ )  $\delta$  7.32 – 7.26 (m, 5H), 5.40 (pt,  $J = 8.4$  Hz, 1H), 3.84 (pt,  $J = 8.8$  Hz, 1H), 3.34 (dd,  $J = 8.7, 7.4$  Hz, 1H), 3.09 – 2.94 (m, 2H) 1.83 – 1.75 (m, 1H), 0.87 – 0.83 (m, 6H).  $^{13}\text{C}$  NMR (101 MHz,  $\text{CDCl}_3$ )  $\delta$  158.53, 139.28, 129.17, 129.02, 125.77, 74.58, 53.07, 52.05, 27.10, 20.21, 20.17. LR MS (ESI)  $m/z$  calcd. for ( $\text{C}_{13}\text{H}_{17}\text{NO}_2$ ): 219.13, found 242.16  $[\text{M}+\text{Na}]^+$ .

### Synthesis of 3-isopentyl-5-phenyloxazolidin-2-one (16)

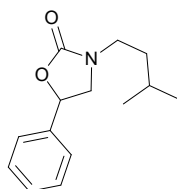

*Method D* of the general catalytic procedure was followed by using 1-isopentyl-2-phenyl aziridine as the reagent (0.211 mL) to obtain a yellowish oil as the product (91% yield, A/B = 99:1). Collected data are in accordance with those reported in literature.<sup>[3]</sup>

$^1\text{H}$  NMR (400 MHz,  $\text{CDCl}_3$ )  $\delta$  7.44 – 7.28 (m, 5H), 5.51 – 5.45 (m, 1H), 3.91 (pt,  $J = 8.7$  Hz, 1H), 3.45 (pt,  $J = 8.0$ , 1H), 3.42 – 3.23 (m, 2H), 1.68 – 1.57 (m, 1H), 1.55 – 1.43 (m, 2H), 0.95 – 0.92 (m, 6H).  $^{13}\text{C}$  NMR (101 MHz,  $\text{CDCl}_3$ )  $\delta$  129.44, 129.31, 126.04, 74.86, 52.68, 43.16, 36.65, 26.29, 23.01, 22.94 ppm. LR MS (ESI)  $m/z$  calcd. for ( $\text{C}_{14}\text{H}_{19}\text{NO}_2$ ): 233.14, found 256.22  $[\text{M}+\text{Na}]^+$ .

### Synthesis of 3-cyclopentyl-5-phenyloxazolidin-2-one (17)

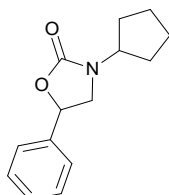

*Method D* of the general catalytic procedure was followed by using 1-cyclopentyl-2-phenyl aziridine as the reagent (0.193 mL) to obtain a yellowish oil as the product (31% yield, A/B = 94:6). Collected data are in accordance with those reported in literature.<sup>[5]</sup>

<sup>1</sup>H NMR (400 MHz, CDCl<sub>3</sub>) δ 7.43 – 7.31 (m, 5H), 5.47 (pt, *J* = 8.0 Hz, 1H), 4.33 – 4.27 (m, 1H), 3.91 – 3.86 (m, 1H), 3.40 (pt, *J* = 8.2 Hz, 1H), 2.00 – 1.88 (m, 2H), 1.70 – 1.54 ppm (m, 6H). <sup>13</sup>C NMR (101 MHz, CDCl<sub>3</sub>) δ 129.37, 129.22, 125.96, 74.93, 55.13, 49.06, 29.63, 29.10, 24.39, 24.37 ppm. LR MS (ESI) *m/z* calcd. for (C<sub>14</sub>H<sub>17</sub>NO<sub>2</sub>): 231.29, found 232.21 [M+H]<sup>+</sup>.

### Synthesis of 3-cyclohexyl-5-phenyloxazolidin-2-one (18)

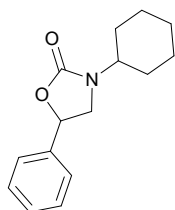

*Method D* of the general catalytic procedure was followed by using 1-cyclohexyl-2-phenyl aziridine as the reagent (0.219 mL) to obtain a yellowish oil as the product (20% yield, A/B = 95:5). Collected data are in accordance with those reported in literature.<sup>[5]</sup>

<sup>1</sup>H NMR (400 MHz, CDCl<sub>3</sub>) δ 7.45 – 7.32 (m, 5H), 5.49 – 5.44 (m, 1H), 3.91 – 3.80 (m, 1H), 3.79 – 3.69 (m, 1H), 3.42 – 3.37 (m, 1H), 1.90 – 1.04 ppm (m, 10H). <sup>13</sup>C NMR (101 MHz, CDCl<sub>3</sub>) δ 129.33, 129.17, 125.93, 75.03, 53.02, 48.78, 31.03, 30.56, 25.83, 25.78, 25.73 ppm. LR MS (ESI) *m/z* calcd. for (C<sub>15</sub>H<sub>19</sub>NO<sub>2</sub>): 245.32, found 268.41 [M+Na]<sup>+</sup>.

### Synthesis of 3-(cyclohexylmethyl)-5-phenyloxazolidin-2-one (19)

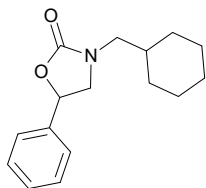

*Method D* of the general catalytic procedure was followed by using 1-cyclohexylmethyl-2-phenyl aziridine as the reagent (0.219 mL) to obtain a yellowish oil as the product (85% yield, A/B = 99:1). Collected data are in accordance with those reported in literature.<sup>[3]</sup>

<sup>1</sup>H NMR (400 MHz, CDCl<sub>3</sub>) δ 7.39 - 7.31 (m, 5H), 5.46 (pt, *J* = 8.2 Hz, 1H), 3.89 (pt, *J* = 8.8 Hz, 1H), 3.40 (dd, *J* = 8.7, 7.6 Hz, 1H), 3.19 - 3.03 (m, 2H), 1.72 - 1.63 (m, 6H), 1.24 - 1.01 (m, 3H), 0.97 - 0.88 ppm (m, 2H). <sup>13</sup>C NMR (101 MHz, CDCl<sub>3</sub>) δ 158.57, 139.29, 129.22, 129.07, 125.83, 74.67, 53.36, 50.91, 36.41, 30.96, 26.66, 26.01 ppm. LR MS (ESI) *m/z* calcd. for (C<sub>16</sub>H<sub>21</sub>NO<sub>2</sub>): 259.16, found 282.28 [M+Na]<sup>+</sup>.

### Synthesis of 3-benzyl-5-phenyloxazolidin-2-one (20)

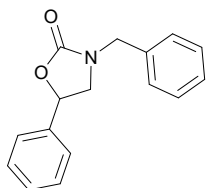

*Method D* of the general catalytic procedure was followed by using 1-benzyl-2-phenyl aziridine as the reagent (0.197 mL) to obtain a yellowish oil as the product (75% yield, A/B = 96:4). Collected data are in accordance with those reported in literature.<sup>[5]</sup>

<sup>1</sup>H NMR (400 MHz, CDCl<sub>3</sub>) δ 7.43 – 7.32 (m, 10H), 5.52 – 5.47 (m, 1H), 4.58 (d, *J* = 15.0 Hz, 1H), 4.43 (d, *J* = 15.0 Hz, 1H), 3.79 (pt, *J* = 8.7 Hz, 1H), 3.36 – 3.30 ppm (m, 1H). <sup>13</sup>C NMR (101 MHz, CDCl<sub>3</sub>) δ 139.03, 136.08, 129.33, 129.25, 128.63, 128.50, 125.96, 74.97, 52.00, 48.87 ppm. LR MS (ESI) *m/z* calcd. for (C<sub>16</sub>H<sub>15</sub>NO<sub>2</sub>): 253.11, found 276.27 [M+Na]<sup>+</sup>.

### Synthesis of 3-(4-methoxybenzyl)-5-phenyloxazolidin-2-one (21)

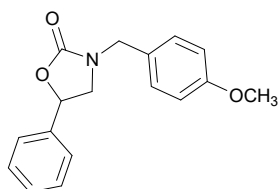

*Method D* of the general catalytic procedure was followed by using 1-(4-methoxybenzyl)-2-phenyl aziridine as the reagent (0.182 mL) to obtain a yellowish oil as the product (42% yield, A/B = 98:2). Collected data are in accordance with those reported in literature.<sup>[6]</sup>

<sup>1</sup>H NMR (400 MHz, CDCl<sub>3</sub>) δ 7.39 – 7.35 (m, 3H), 7.32 – 7.30 (m, 2H), 7.23 (d, *J* = 8.6 Hz, 2H), 6.89 (d, *J* = 8.6 Hz, 2H), 5.47 (pt, *J* = 8.2 Hz, 1H), 4.49 (d, *J* = 14.7 Hz, 1H), 4.37 (d, *J* = 14.7 Hz, 1H), 3.82 (s, 3H), 3.76 (pt, *J* = 8.8 Hz, 1H), 3.30 ppm (dd, *J* = 8.7, 7.6 Hz, 1H). <sup>13</sup>C NMR (101 MHz, CDCl<sub>3</sub>) δ 159.79, 129.94, 129.23, 129.15, 128.03, 125.89, 114.60, 74.87, 55.66, 51.79, 48.20 ppm. LR MS (ESI) *m/z* calcd. for (C<sub>17</sub>H<sub>17</sub>NO<sub>3</sub>): 283.12, found 306.39 [M+Na]<sup>+</sup>.

### Synthesis of 3-(3-methoxybenzyl)-5-phenyloxazolidin-2-one (22)

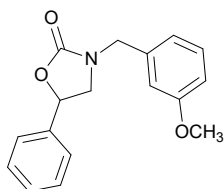

*Method D* of the general catalytic procedure was followed by using 1-(3-methoxybenzyl)-2-phenyl aziridine as the reagent (0.182 mL) to obtain a yellowish oil as the product (55% yield, A/B = 93:7). Collected data are in accordance with those reported in literature.<sup>[6]</sup>

<sup>1</sup>H NMR (400 MHz, CDCl<sub>3</sub>) δ 7.40 – 7.27 (m, 7H), 7.00 – 6.85 (m, 2H), 5.48 – 5.41 (m, 1H), 4.51 (d, *J* = 14.7 Hz, 2H), 3.84 – 3.80 (m, 4H), 3.37 – 3.31 (m, 1H) ppm. <sup>13</sup>C NMR (101 MHz, CDCl<sub>3</sub>) δ 160.07, 157.95,

138.66, 137.23, 130.20, 129.43, 128.82, 125.60, 120.80, 113.64, 110.48, 74.50, 55.36, 51.98, 43.11 ppm.  
LR MS (ESI)  $m/z$  calcd. for (C<sub>17</sub>H<sub>17</sub>NO<sub>3</sub>): 283.12, found 306.39 [M+Na]<sup>+</sup>.

## 6. Recycling test

In a 2.0 mL glass liner equipped with a screw cap and glass wool, 3.0 cm<sup>2</sup> of **3@CC** (0.1% mol of anchored hematin, 1.0 x 10<sup>-6</sup> mol) and 1-butyl-2-phenyl aziridine (0.194 mL, 1.0 x 10<sup>-3</sup> mol) were suspended in 0.6 mL of DCE. The vessel was transferred into a stainless-steel autoclave and 1.2 MPa of CO<sub>2</sub> were charged at room temperature. The autoclave was placed in a preheated oil bath at 125°C, stirred for 12 hours and then quenched in an ice bath and slowly vented. At the end of the reaction **3@CC** was collected in a filter and washed three times with DCE (3 x 1.0 mL). The recovered heterogenous catalyst was reused by repeating the above-described procedure for three consecutive times. All the organic phases were combined and dried under vacuum. The resulting crude was analysed by <sup>1</sup>H NMR spectroscopy by using mesitylene as the internal standard. The desired product (**14**) was obtained in 70% of global yield and A/B = 94:6.

## 7. Characterization of **3@CC** after the catalytic synthesis of **14a**

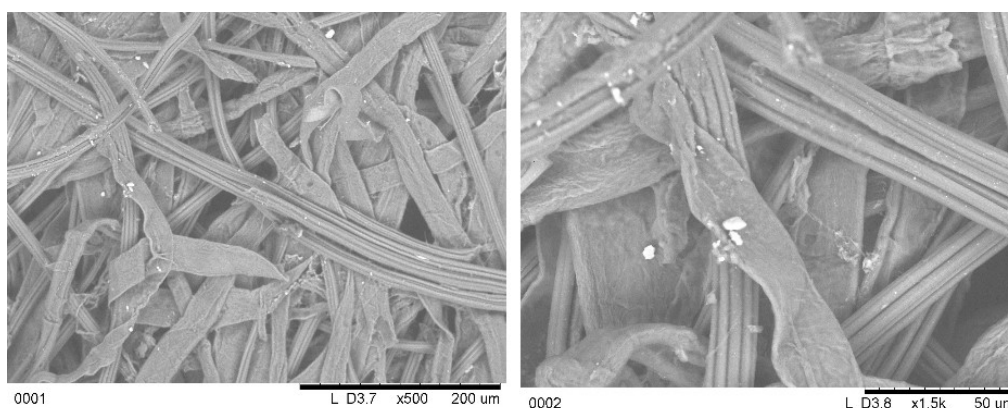

Figure S9: SEM images of **3@CC** after the catalytic synthesis of **14a**.

| entry | sample V (L) | mg Fe     | sample weight | % Fe      |
|-------|--------------|-----------|---------------|-----------|
| 1     | 0,012        | 0,0132598 | 12            | 0,1104962 |
| 2     | 0,012        | 0,0193589 | 15,6          | 0,1240958 |

Figure S10: ICP-OES analyses of **3@CC** (entry 1) and **3@CC** after the catalytic synthesis of **14a** (entry 2).

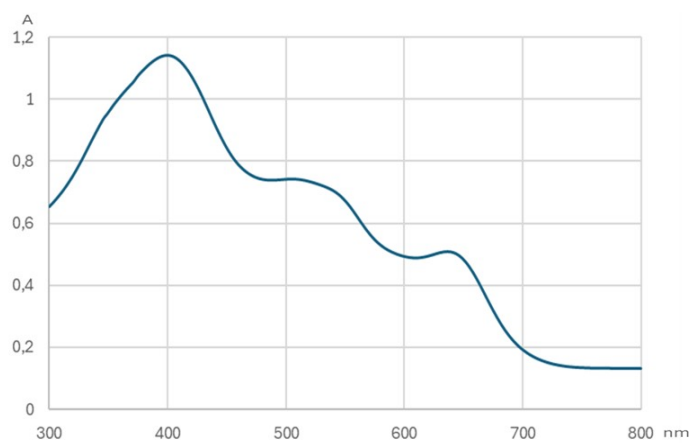

**Figure S11:** UV/visible spectrum of **3@CC** after the catalytic synthesis of **14a**.

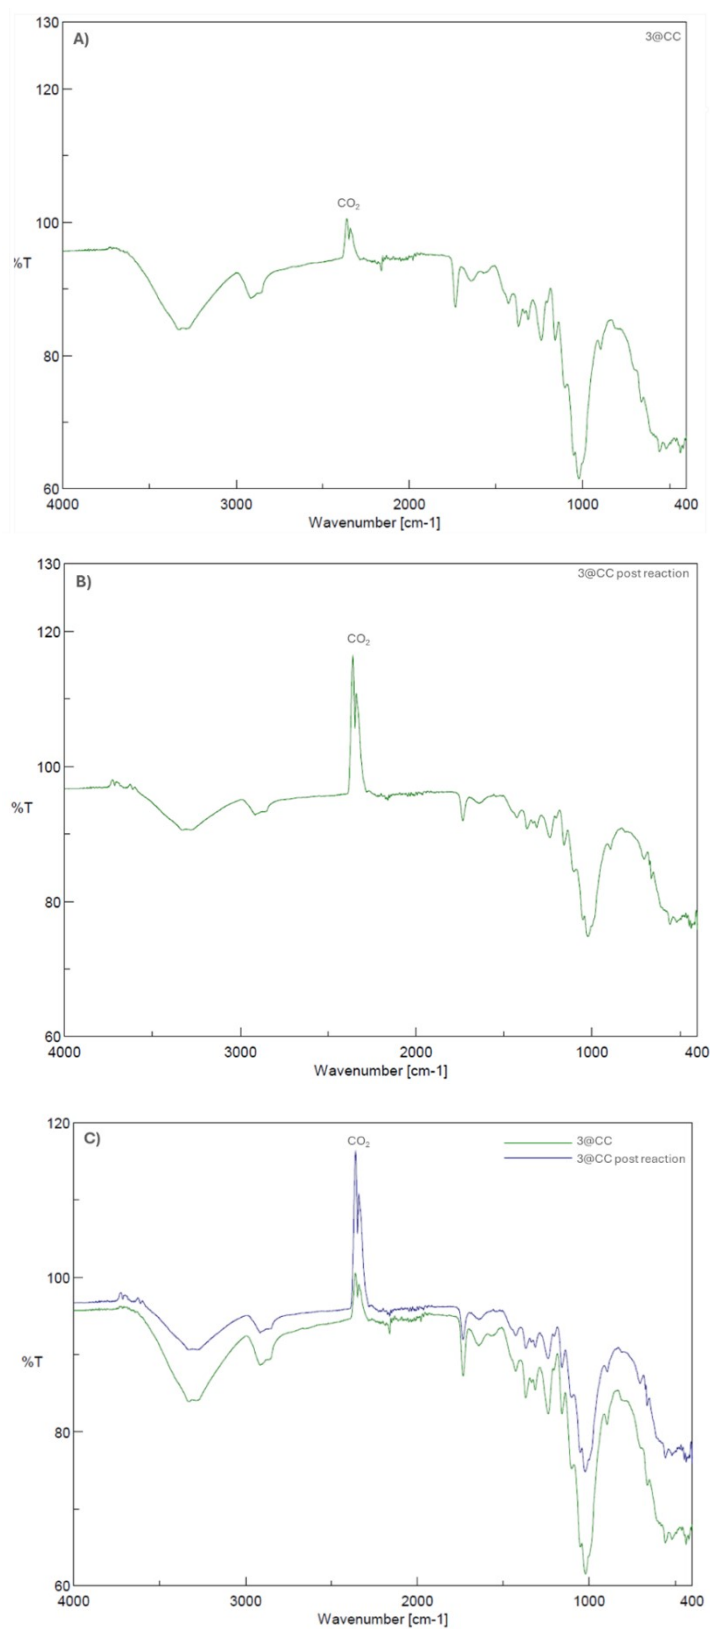

**Figure S12:** ATR spectra of **3@CC** (catalytic loading = 0.054 mg/cm<sup>2</sup>) (A), **3@CC** after the catalytic synthesis of **14a** (B) and superimposed spectrum of **3@CC** before and after the synthesis of **14a** (C).



## 8. UV-Visible studies on the aziridine/epoxide coordination

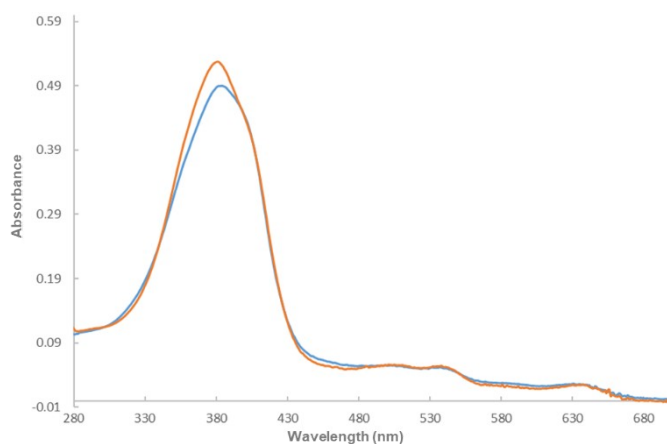

**Figure S13:** UV-Visible spectra (Sorét region) of **2** (blue line) and **2** + 1-butyl-2-phenyl aziridine (ratio = 1:100; orange line).

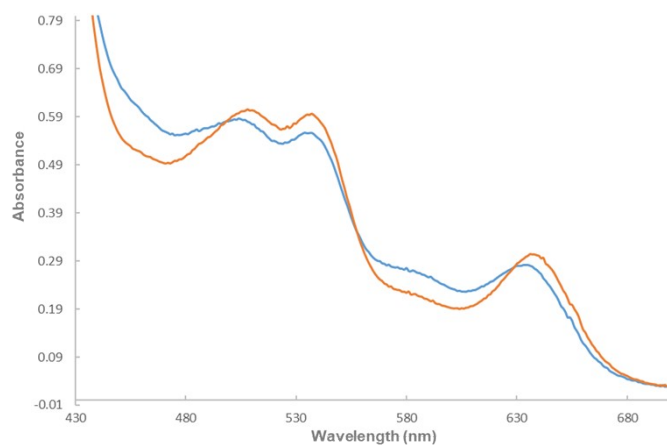

**Figure S14:** UV-Visible spectra (Q-bands region) of **2** (blue line) and **2** + 1-butyl-2-phenyl aziridine (ratio = 1:100; orange line).

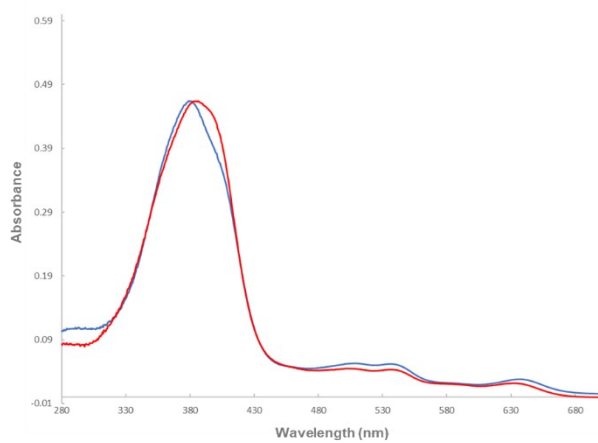

**Figure S15:** UV-Visible spectra (Sorét region) of **2** (blue line) and **2** + styrene oxide (ratio = 1:100; red line).

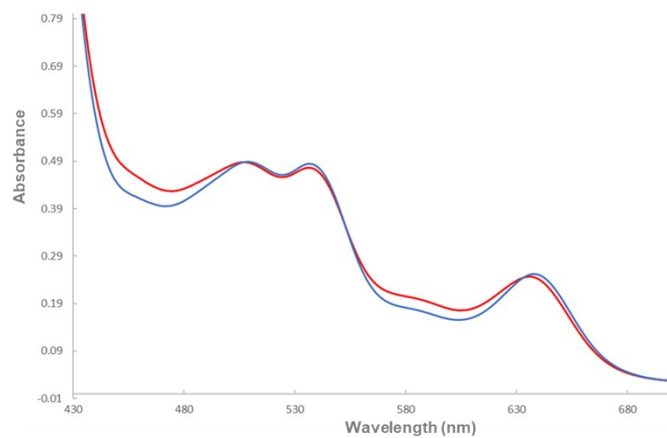

Figure S16: UV-Visible spectra (Q-bands region) of **2** (blue line) and **2** + styrene oxide (red line).

## 9. $^1\text{H}$ and $^{13}\text{C}$ NMR spectra

### $^1\text{H}$ NMR spectrum (400 MHz, $\text{CDCl}_3$ , 298K) of **4**

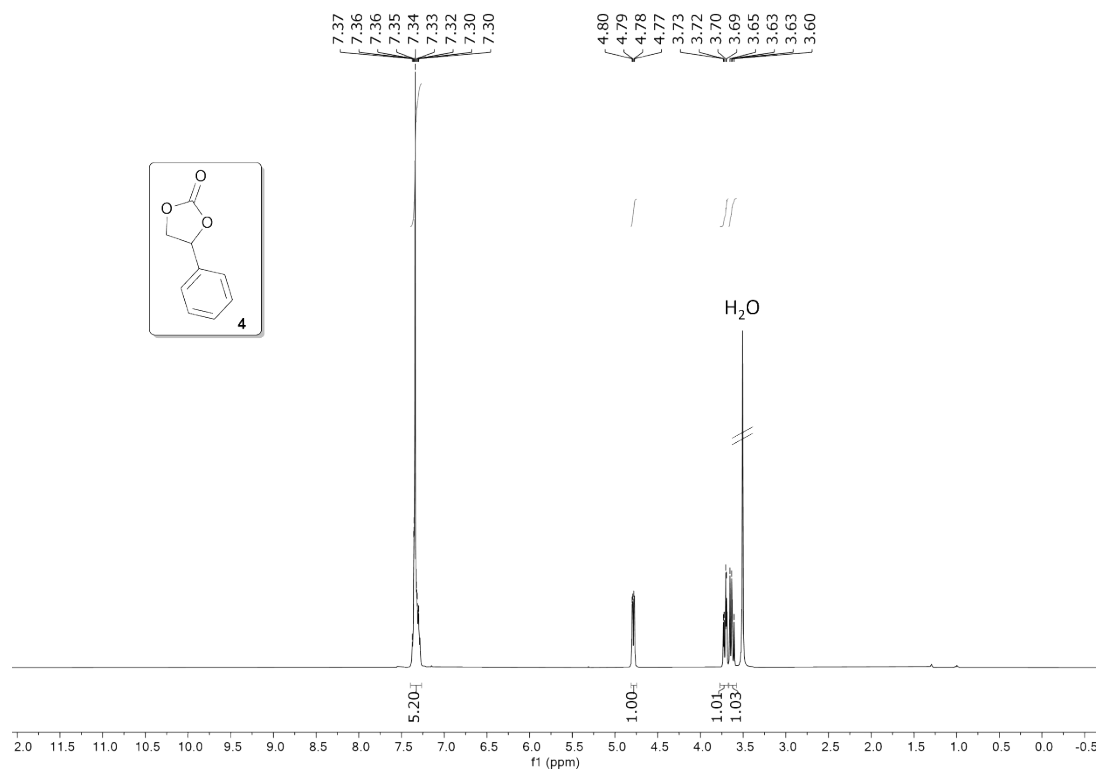

**<sup>13</sup>C NMR spectrum (101 MHz, CDCl<sub>3</sub>, 298K) of 4**

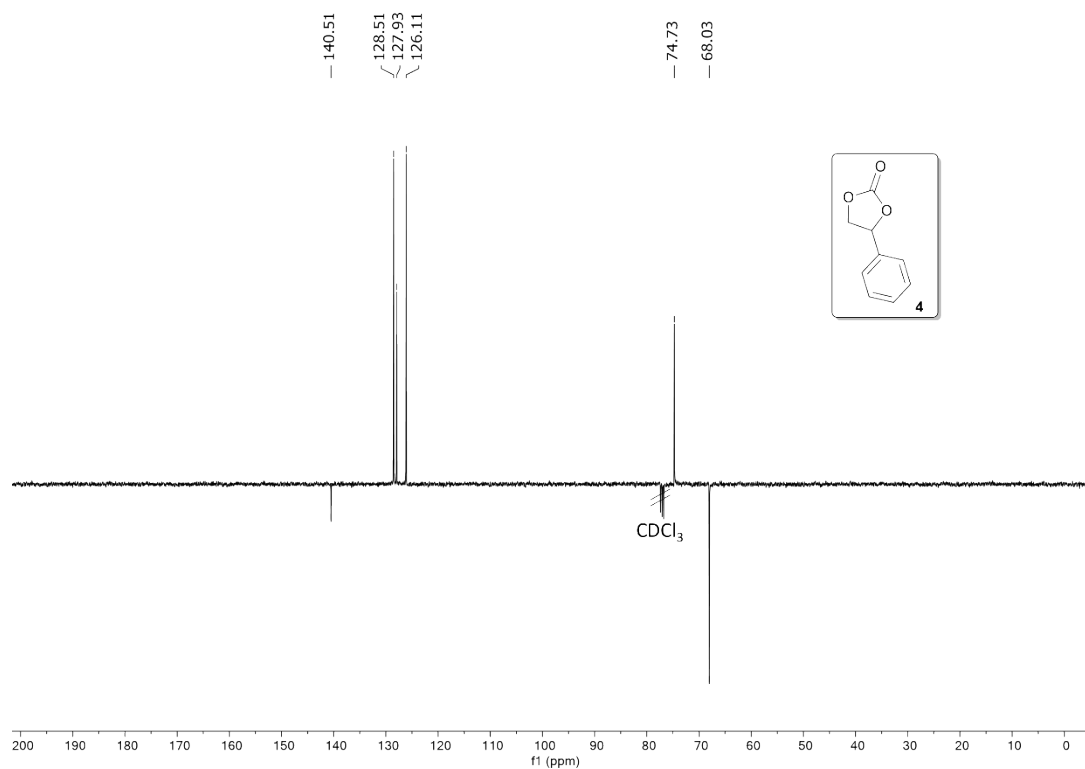

**<sup>1</sup>H NMR spectrum (400 MHz, CDCl<sub>3</sub>, 298K) of 5**

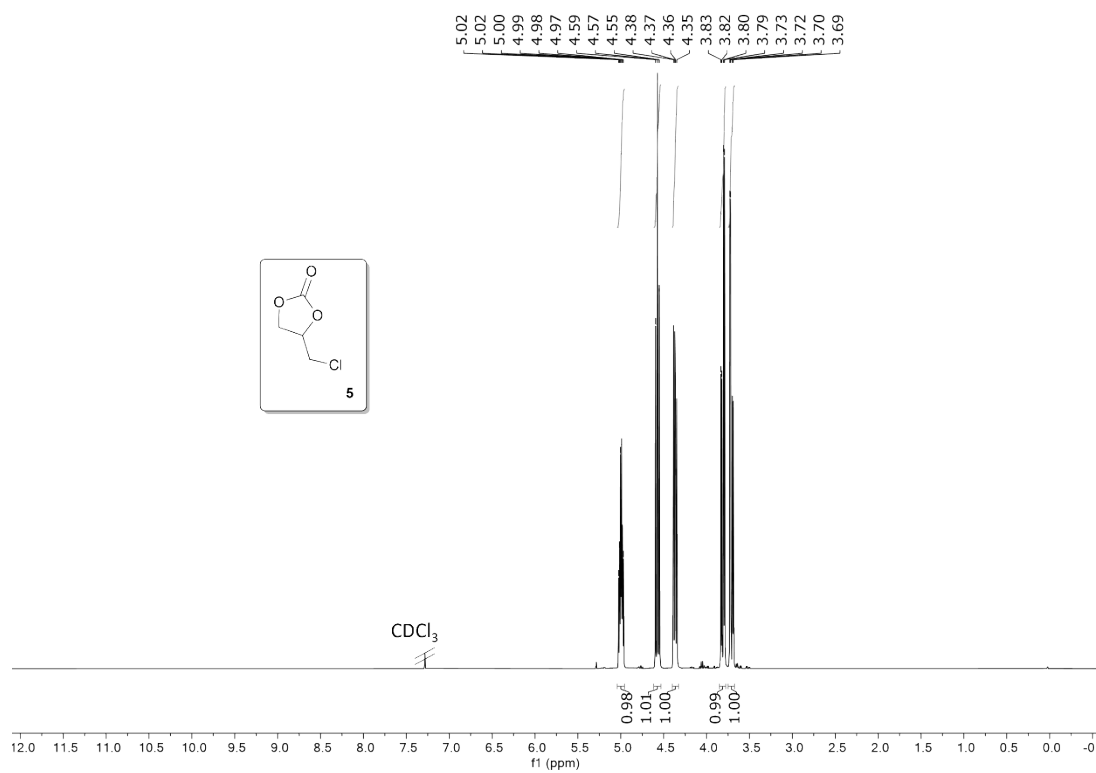

**<sup>13</sup>C NMR spectrum (101 MHz, CDCl<sub>3</sub>, 298K) of 5**

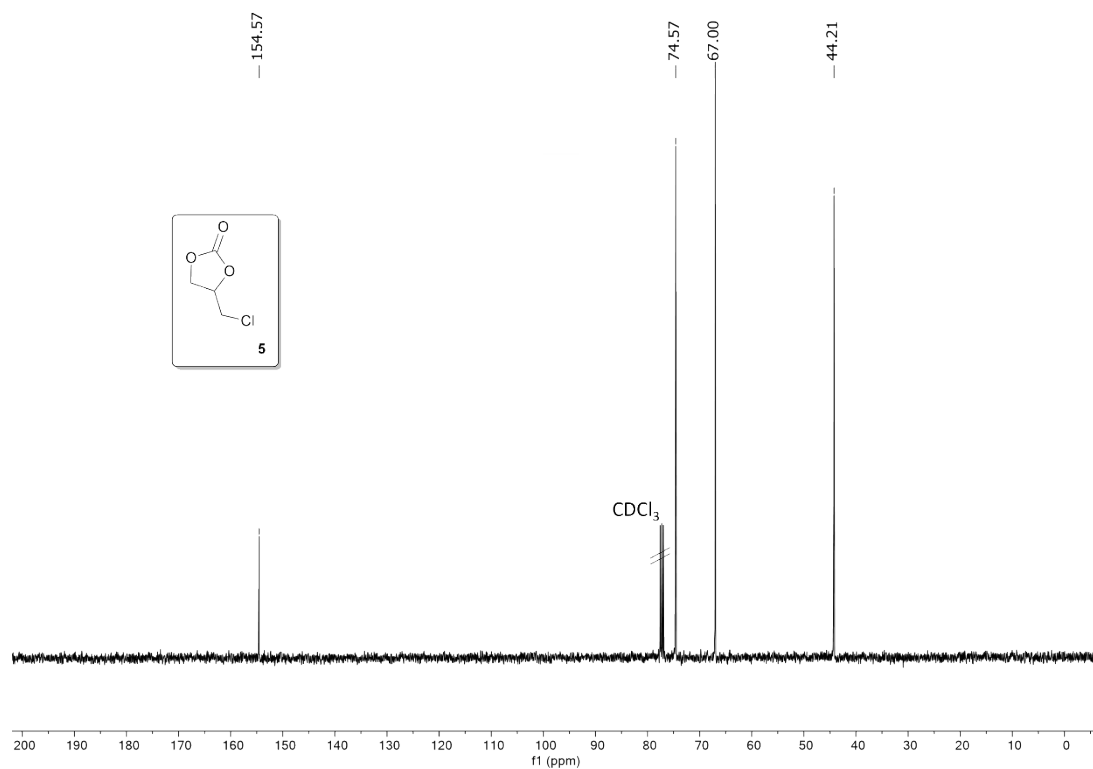

**<sup>1</sup>H NMR spectrum (400 MHz, CDCl<sub>3</sub>, 298K) of 6**

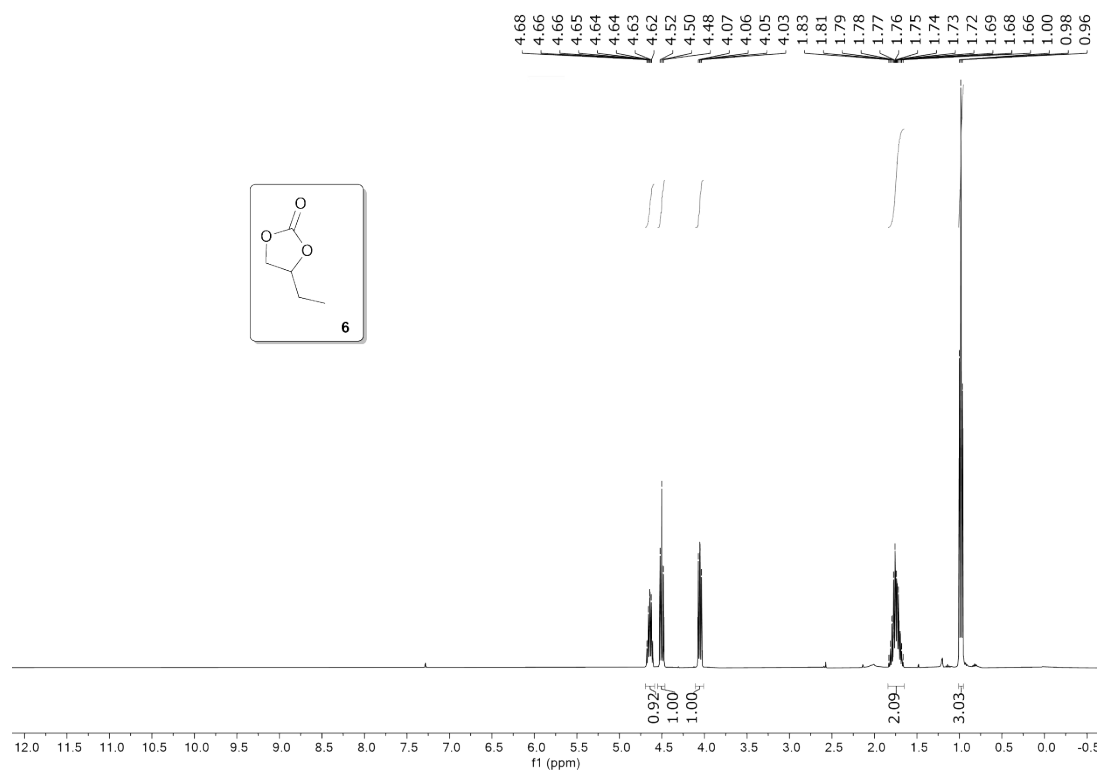

**<sup>13</sup>C NMR spectrum (101 MHz, CDCl<sub>3</sub>, 298K) of 6**

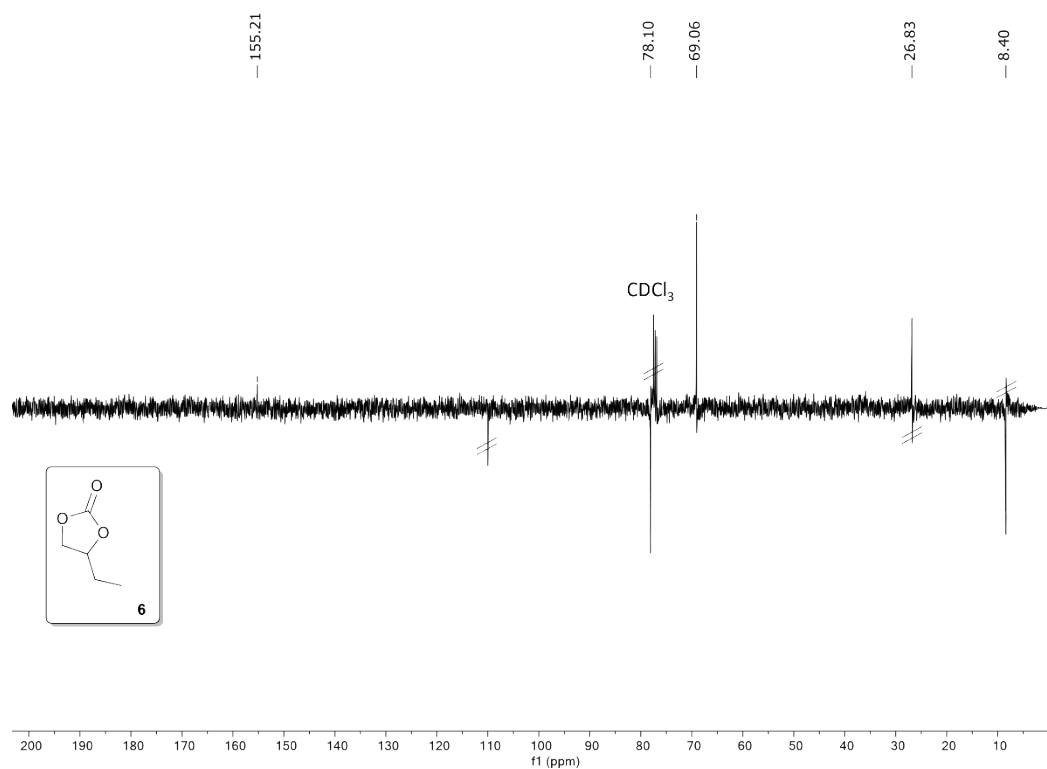

**<sup>1</sup>H NMR spectrum (400 MHz, CDCl<sub>3</sub>, 298K) of 7**

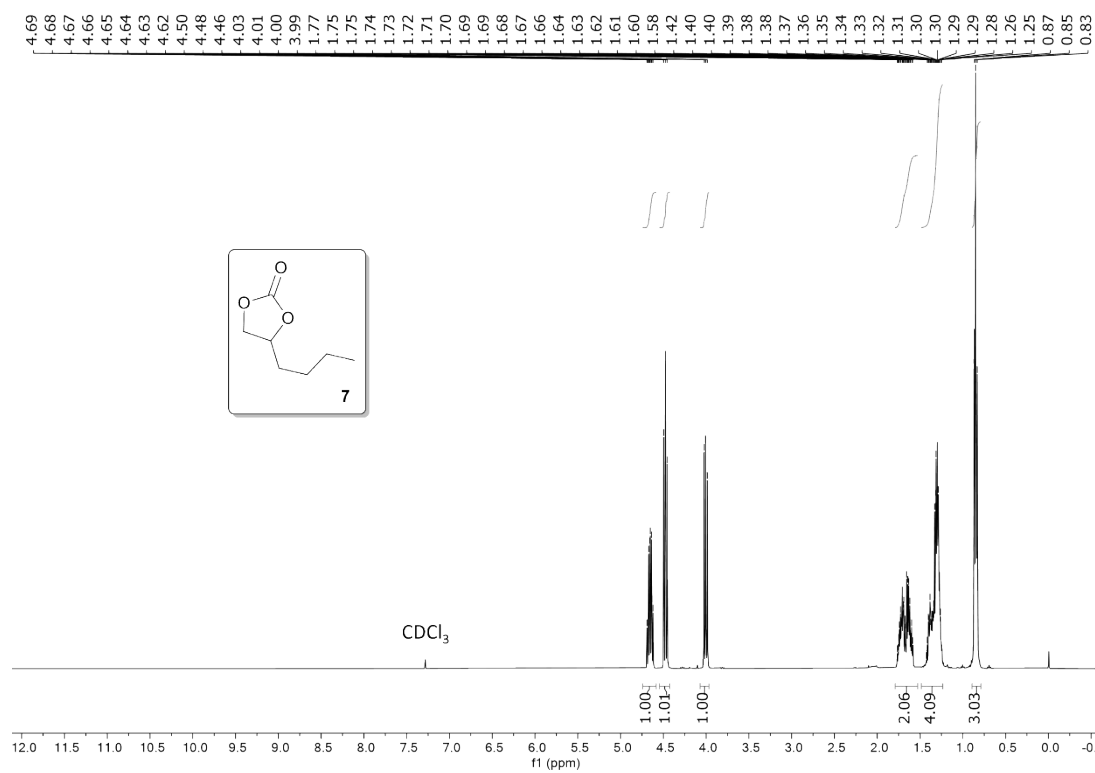

**<sup>13</sup>C NMR spectrum (101 MHz, CDCl<sub>3</sub>, 298K) of 7**

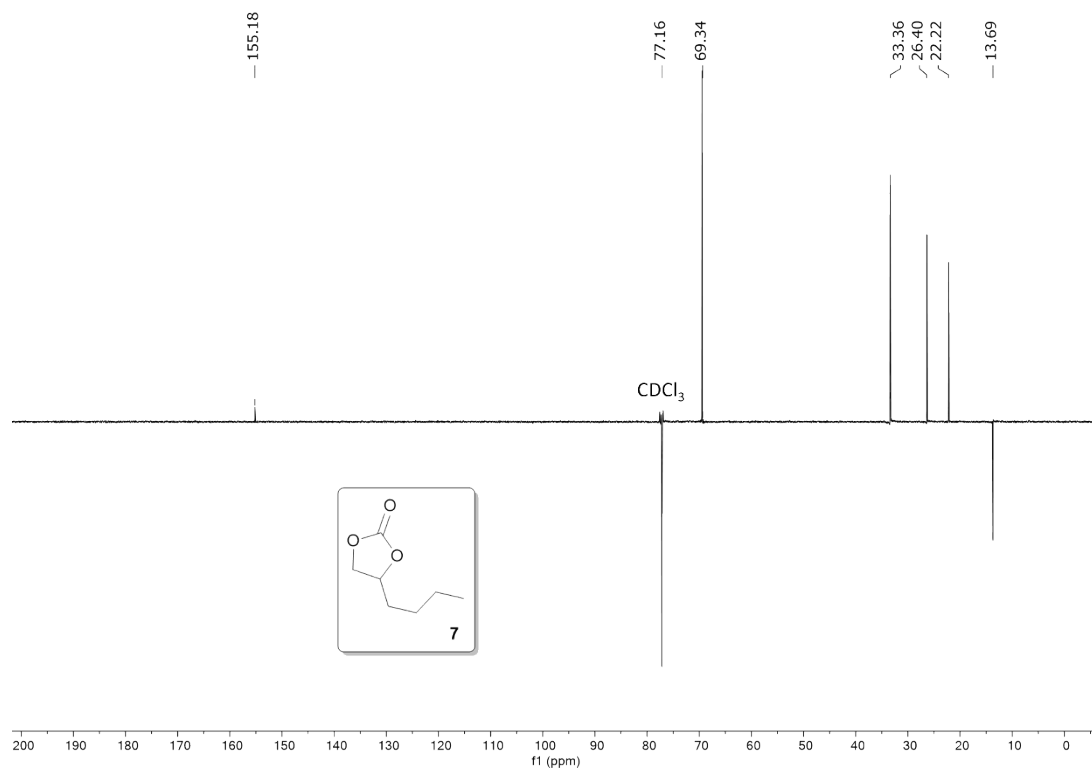

**<sup>1</sup>H NMR spectrum (400 MHz, CDCl<sub>3</sub>, 298K) of 8**

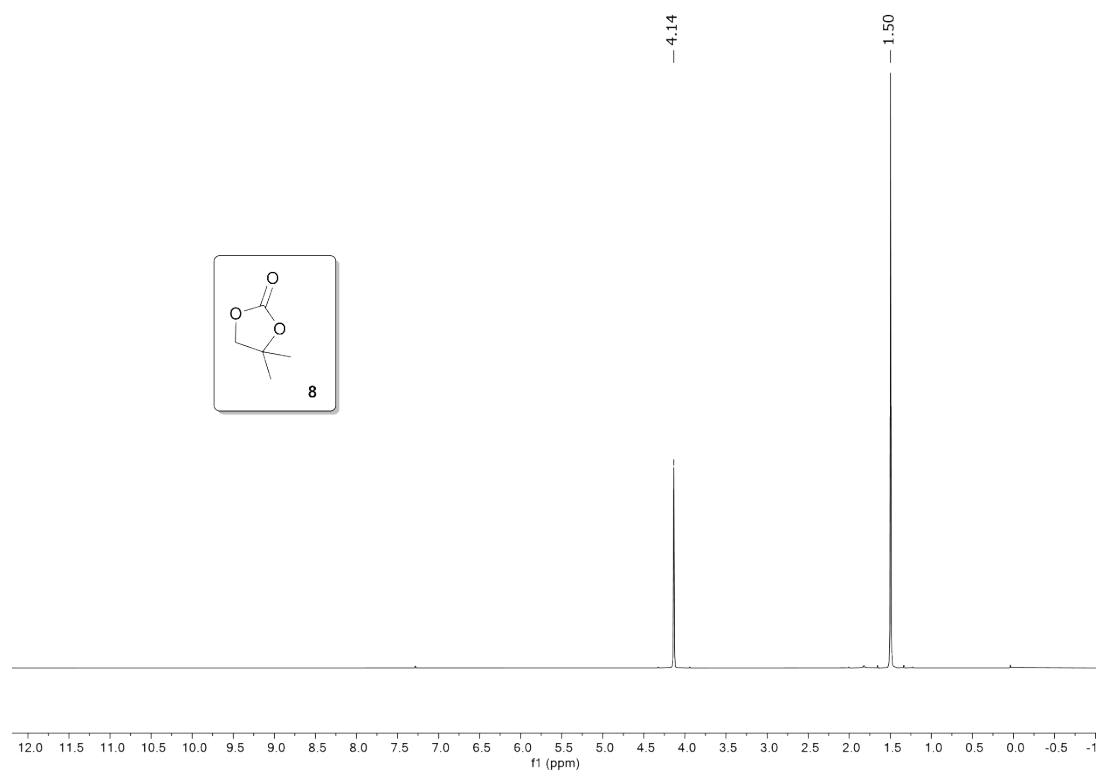

**<sup>13</sup>C NMR spectrum (101 MHz, CDCl<sub>3</sub>, 298K) of 8**

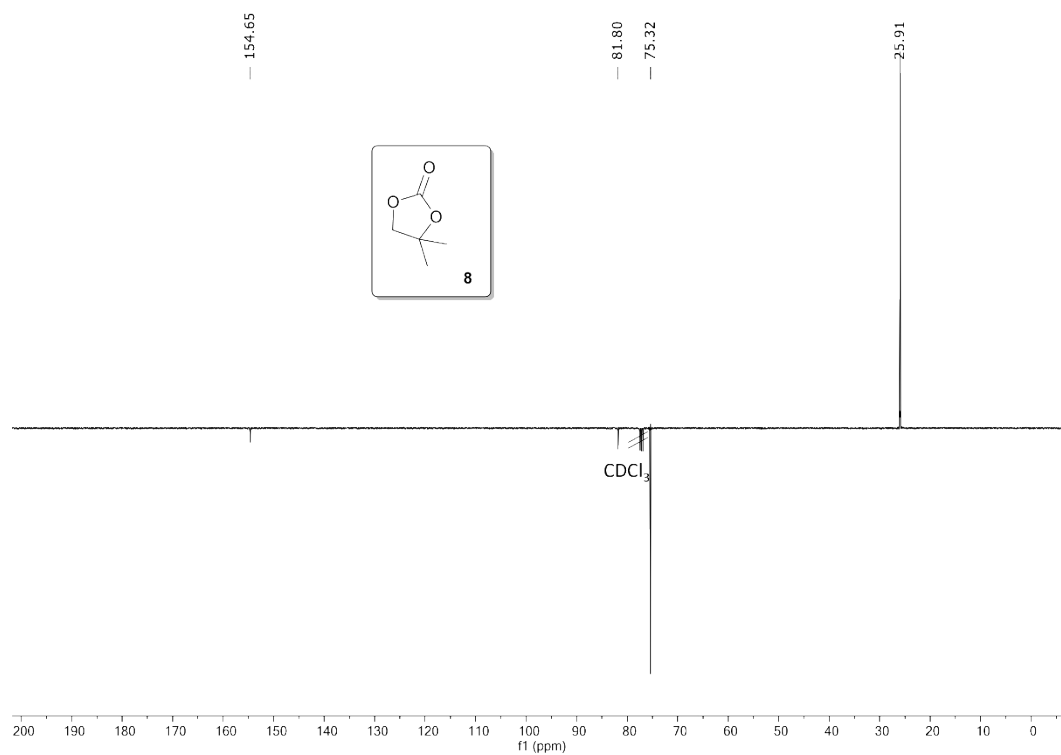

**<sup>1</sup>H NMR spectrum (400 MHz, CDCl<sub>3</sub>, 298K) of 9**

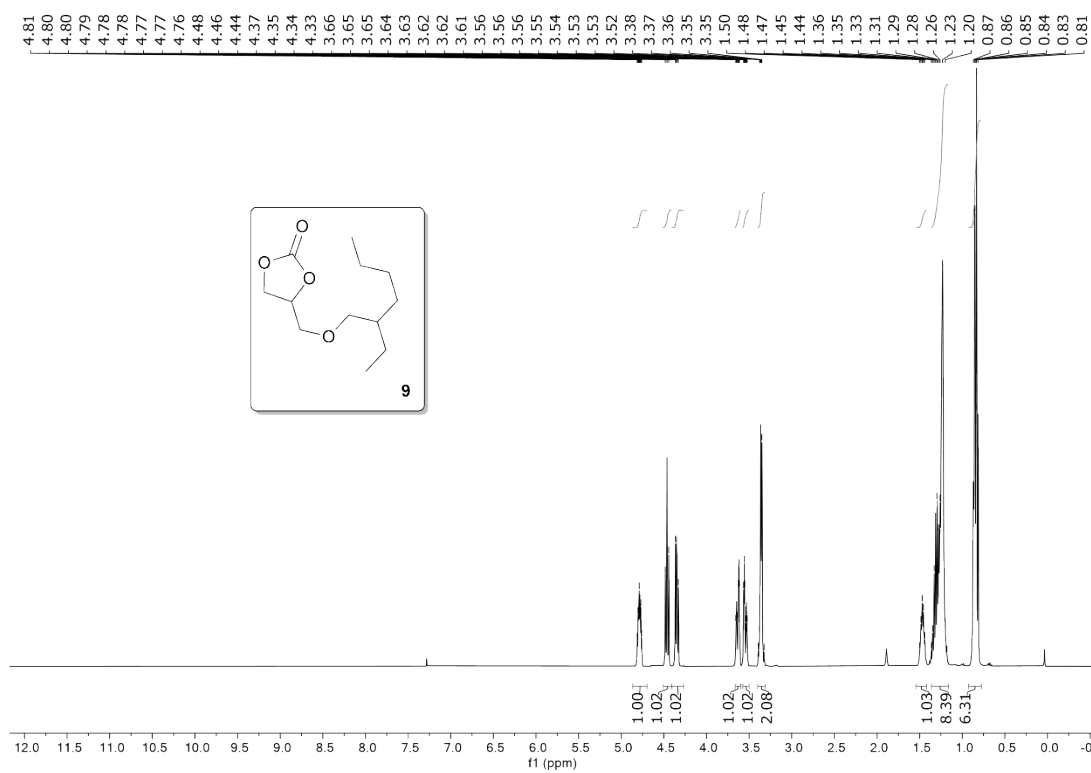

**<sup>13</sup>C NMR spectrum (101 MHz, CDCl<sub>3</sub>, 298K) of 9**

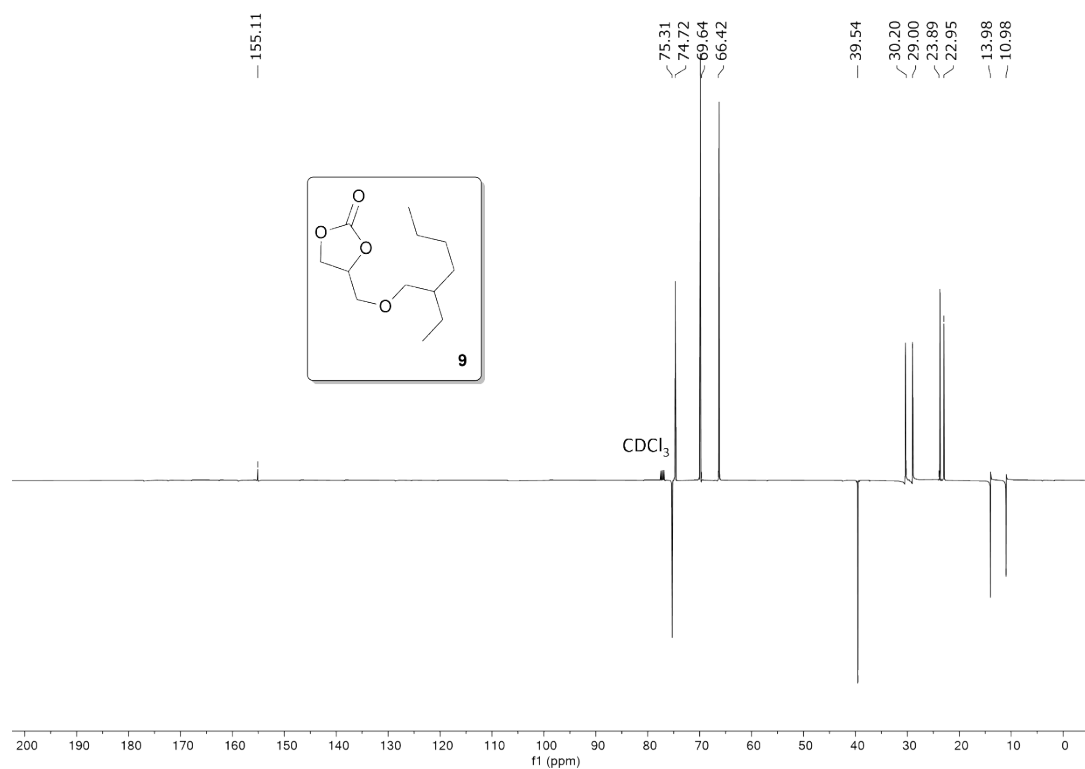

**<sup>1</sup>H NMR spectrum (400 MHz, CDCl<sub>3</sub>, 298K) of 10**

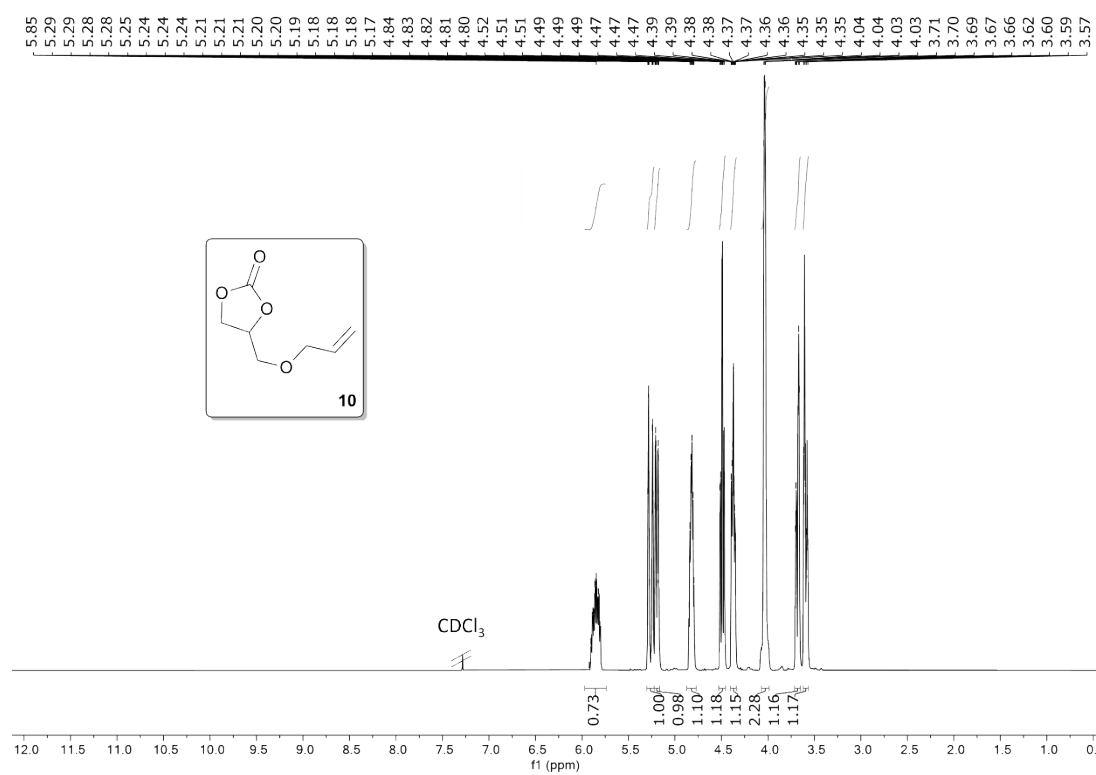



**<sup>13</sup>C NMR spectrum (101 MHz, CDCl<sub>3</sub>, 298K) of 10**

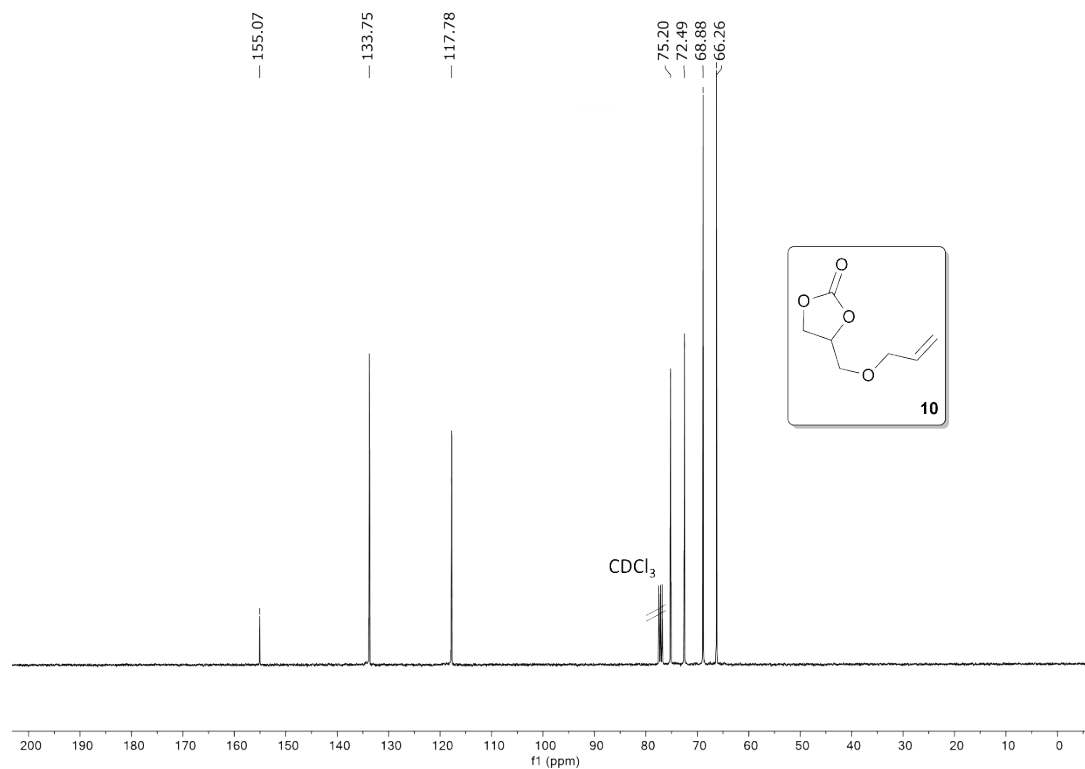

**<sup>1</sup>H NMR spectrum (400 MHz, CDCl<sub>3</sub>, 298K) of 11**

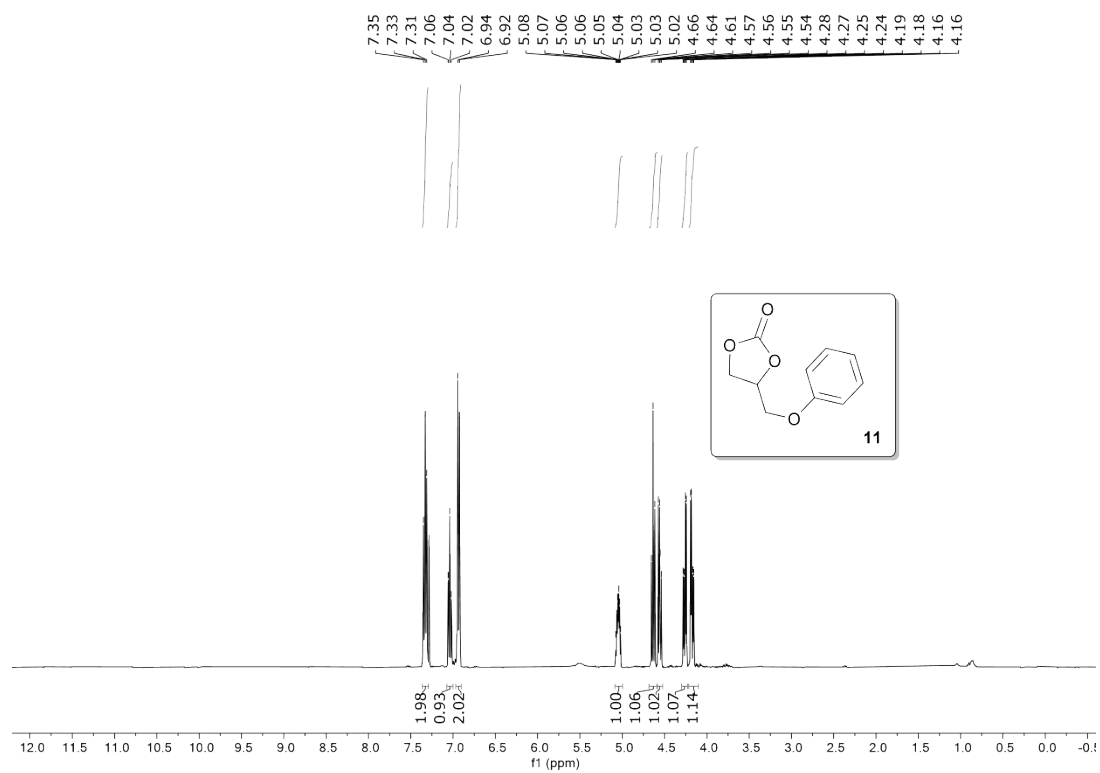

**<sup>13</sup>C NMR spectrum (101 MHz, CDCl<sub>3</sub>, 298K) of 11**

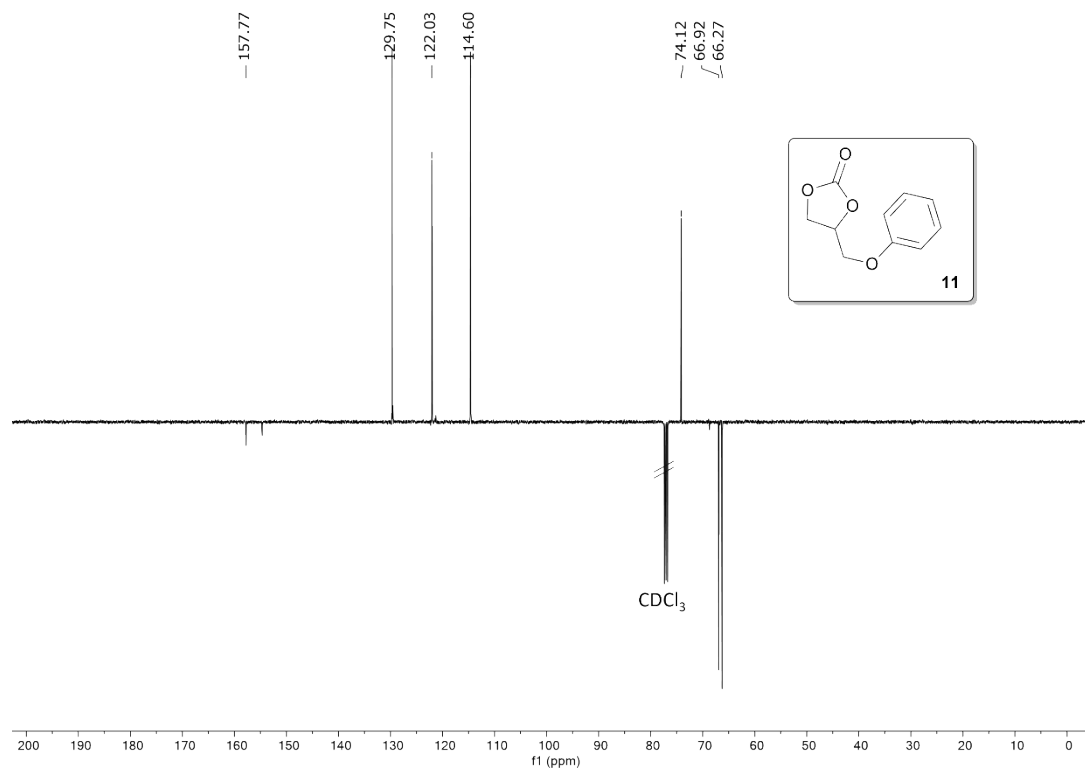

**<sup>1</sup>H NMR spectrum (400 MHz, CDCl<sub>3</sub>, 298K) of 12**

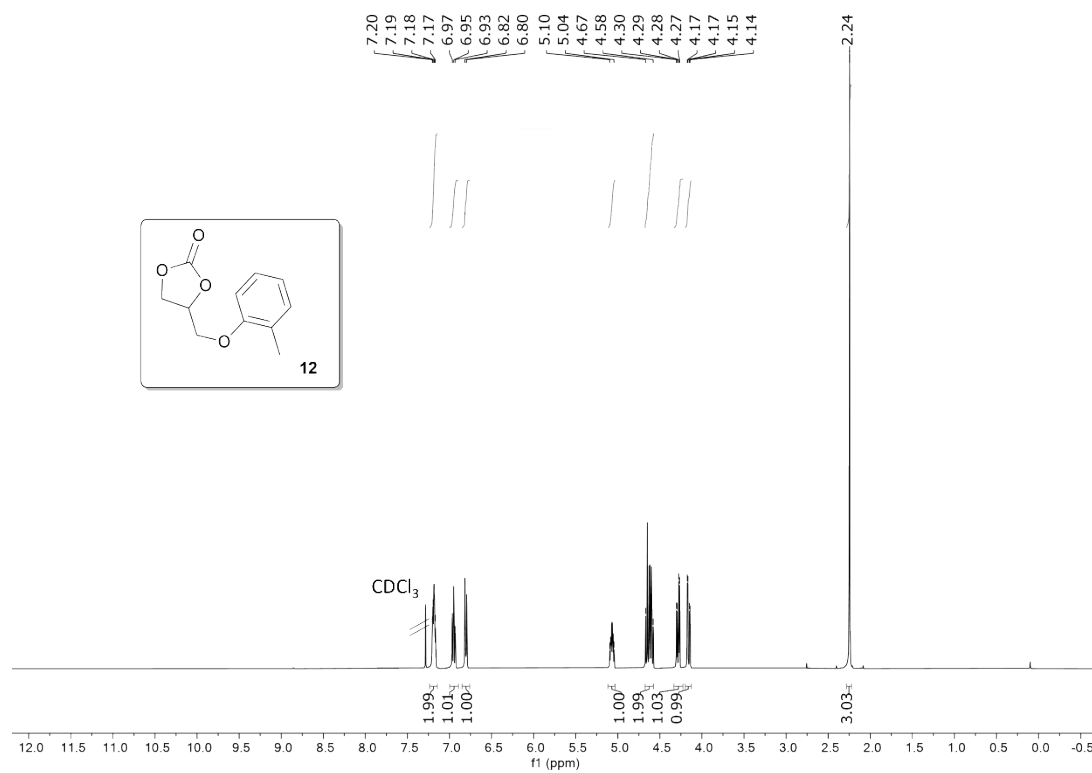

**<sup>13</sup>C NMR spectrum (101 MHz, CDCl<sub>3</sub>, 298K) of 12**

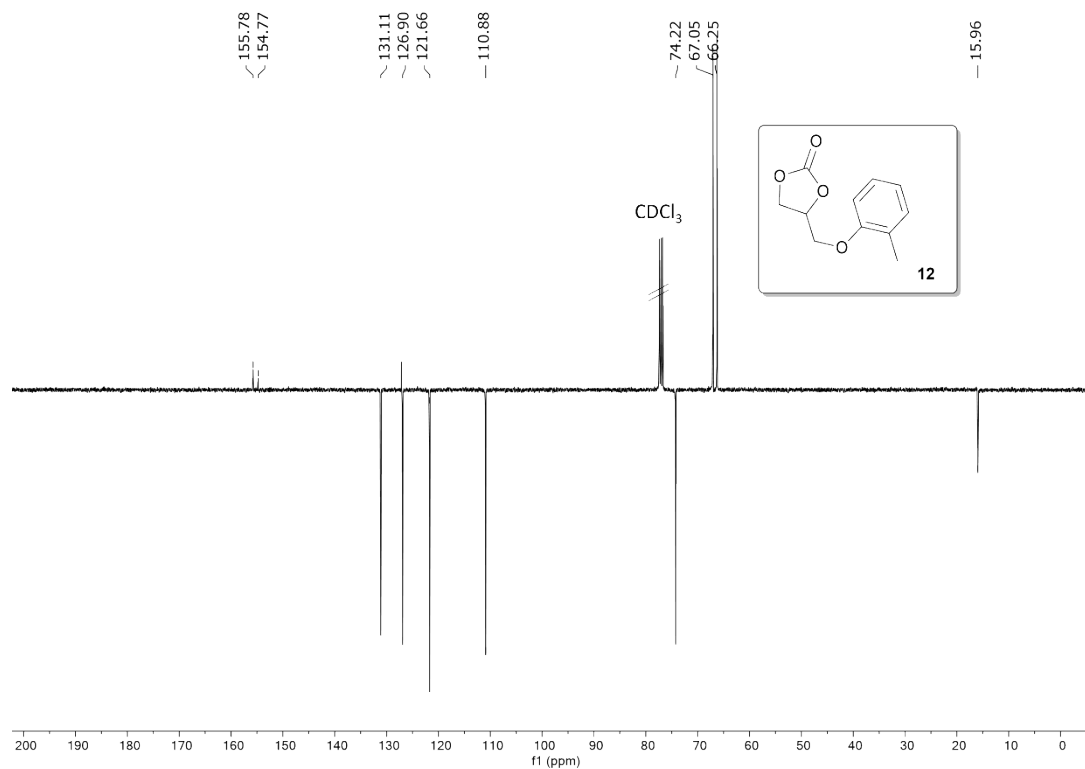

**<sup>1</sup>H NMR spectrum (400 MHz, CDCl<sub>3</sub>, 298K) of 13**

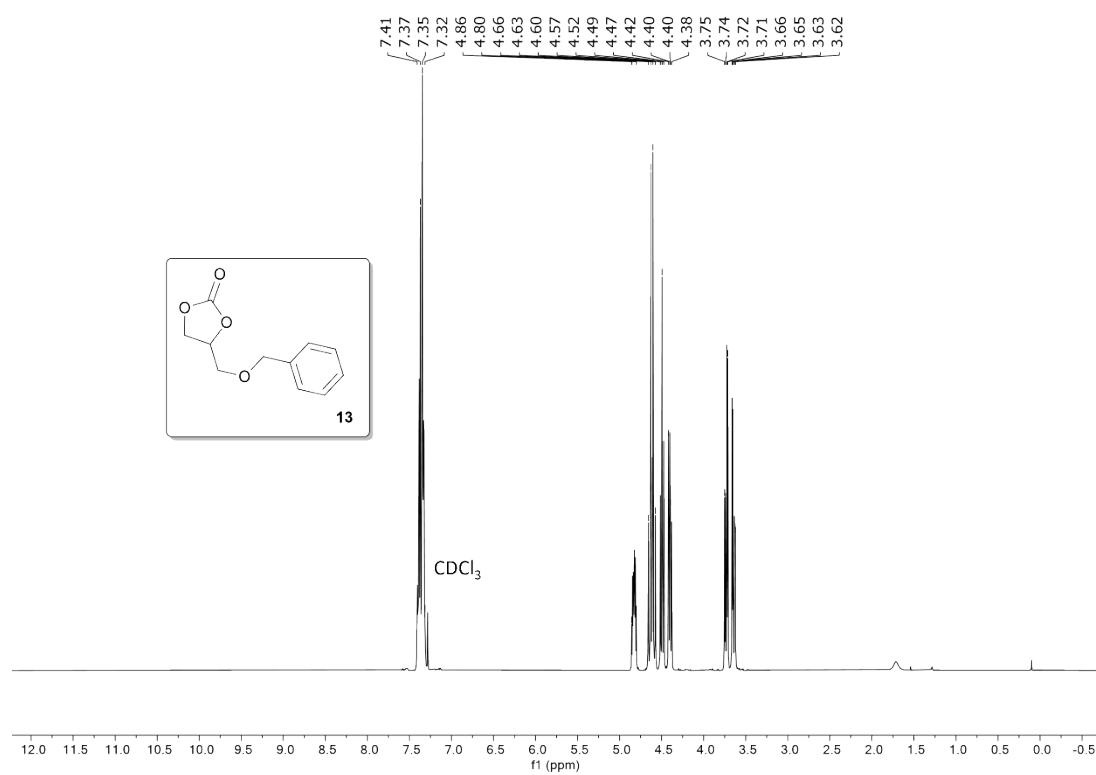

**<sup>13</sup>C NMR spectrum (300 MHz, CDCl<sub>3</sub>, 298K) of 13**

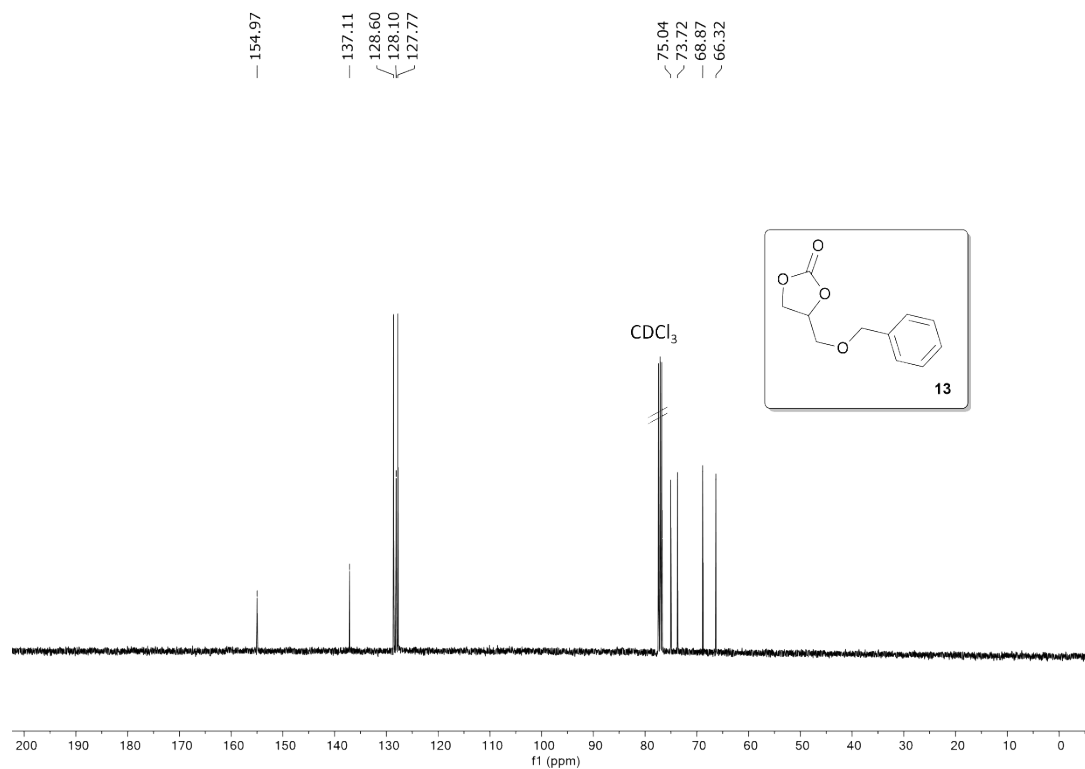

**<sup>1</sup>H NMR spectrum (400 MHz, CDCl<sub>3</sub>, 298K) of 14**

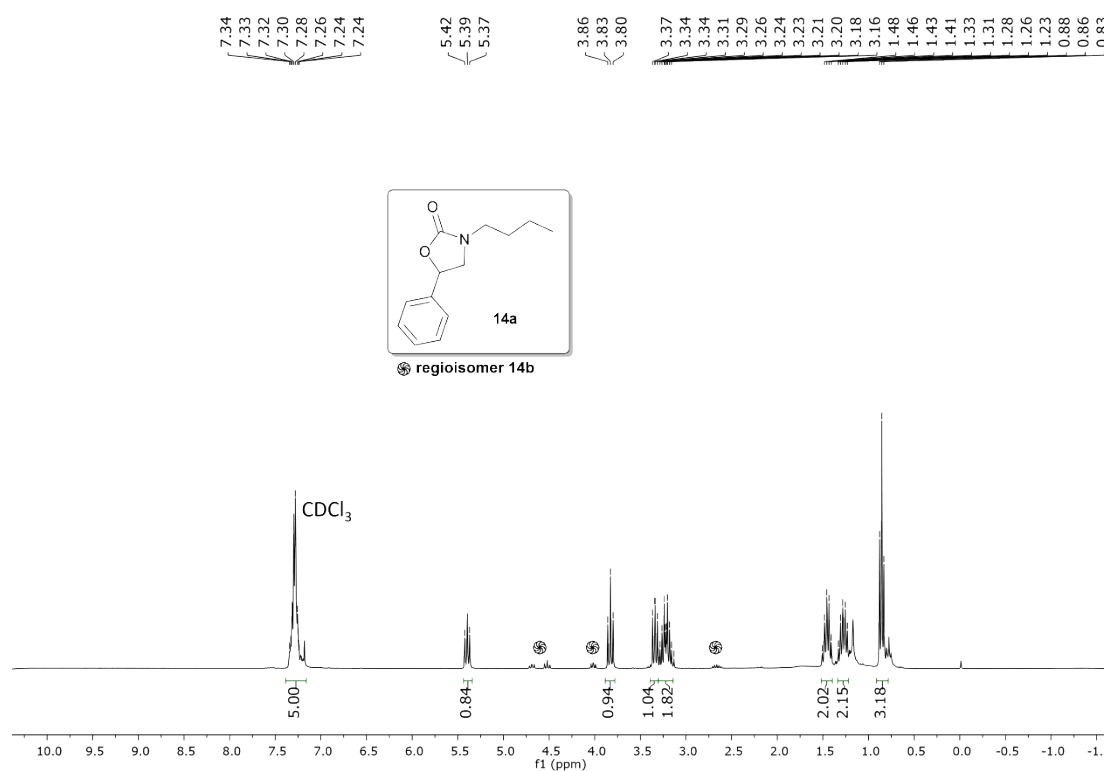

**<sup>13</sup>C NMR spectrum (101 MHz, CDCl<sub>3</sub>, 298K) of 14**

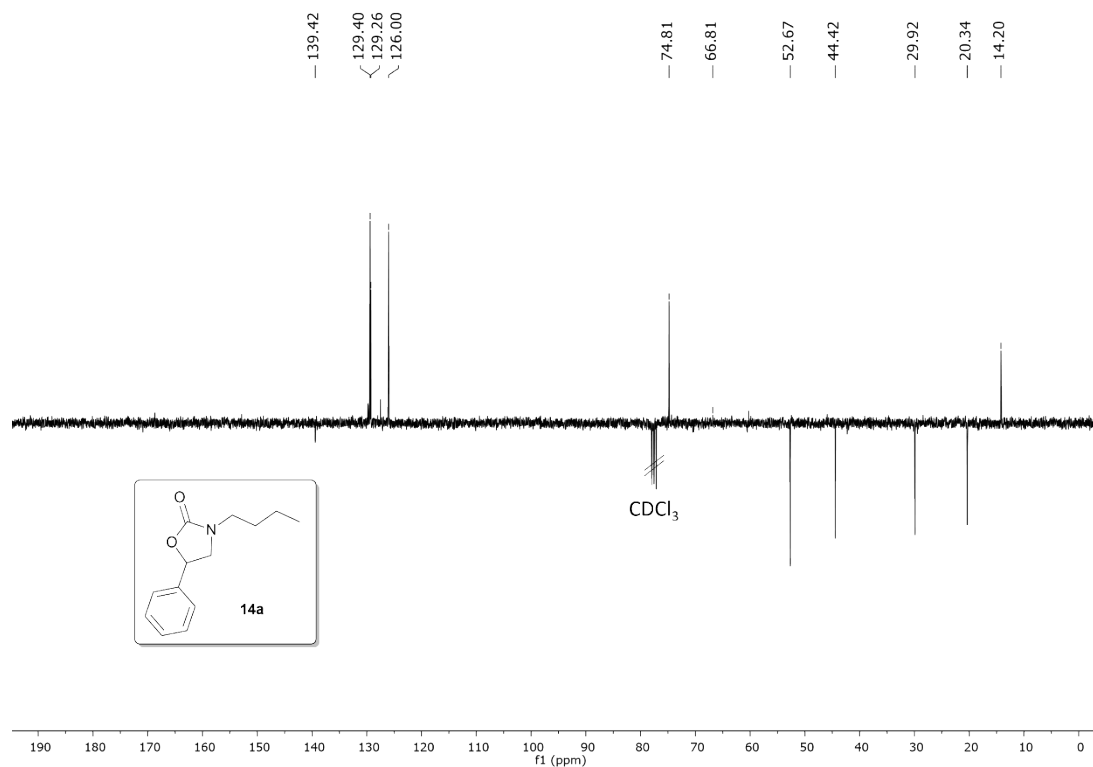

**<sup>1</sup>H NMR spectrum (400 MHz, CDCl<sub>3</sub>, 298K) of 15**

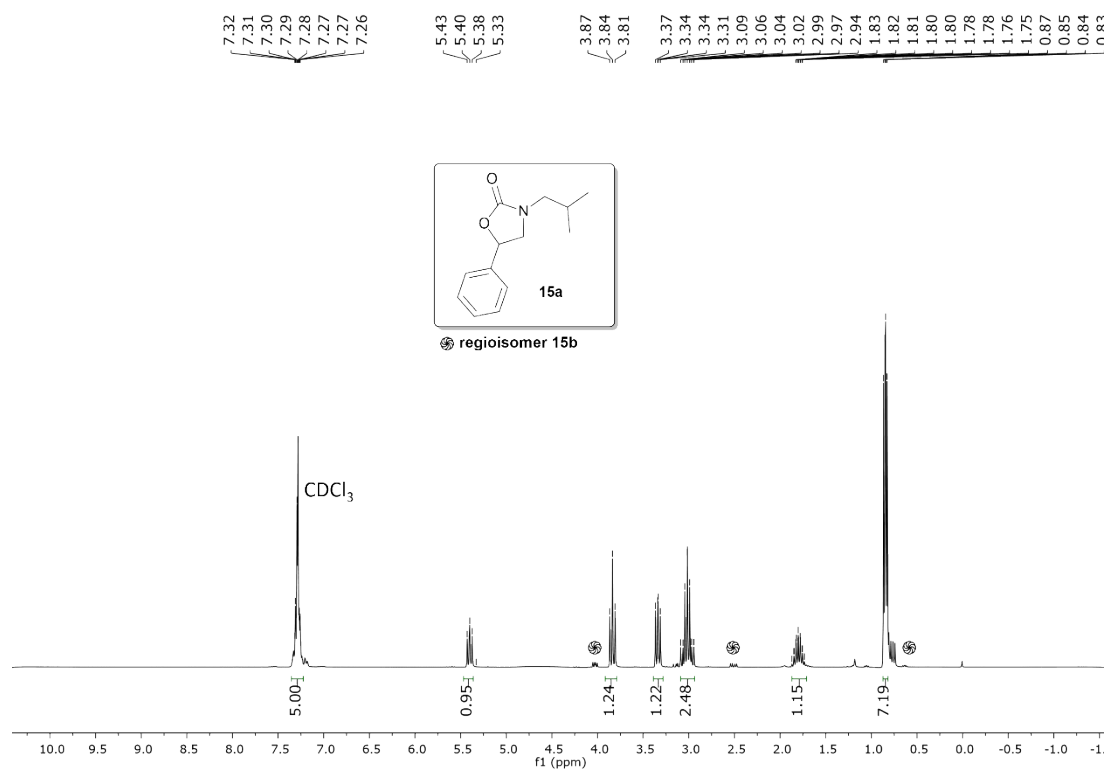

**<sup>13</sup>C NMR spectrum (101 MHz, CDCl<sub>3</sub>, 298K) of 15**

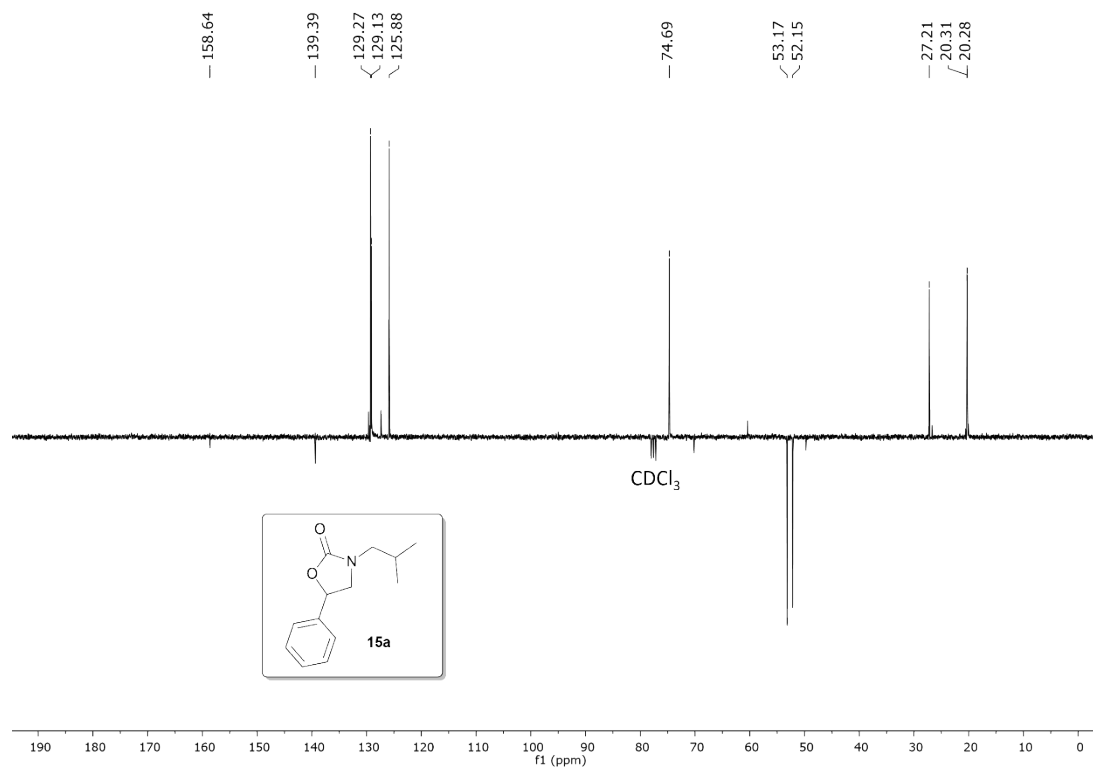

**<sup>1</sup>H NMR spectrum (400 MHz, CDCl<sub>3</sub>, 298K) of 16**

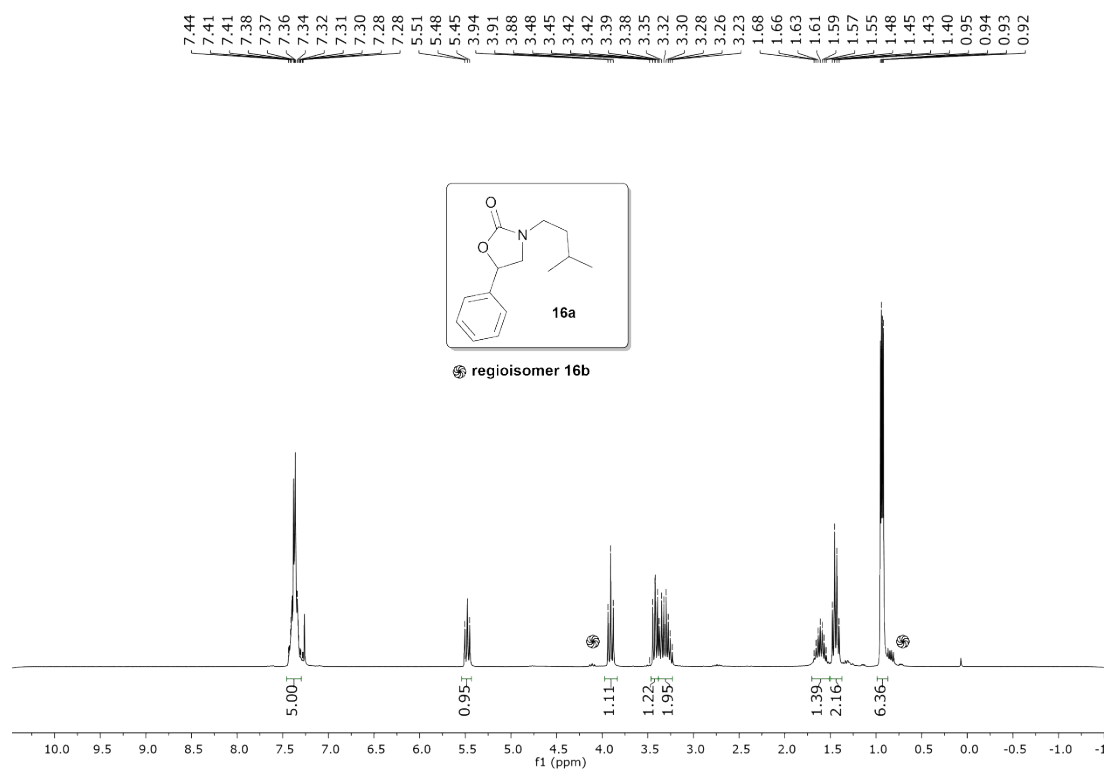

**<sup>13</sup>C NMR spectrum (101 MHz, CDCl<sub>3</sub>, 298K) of 16**

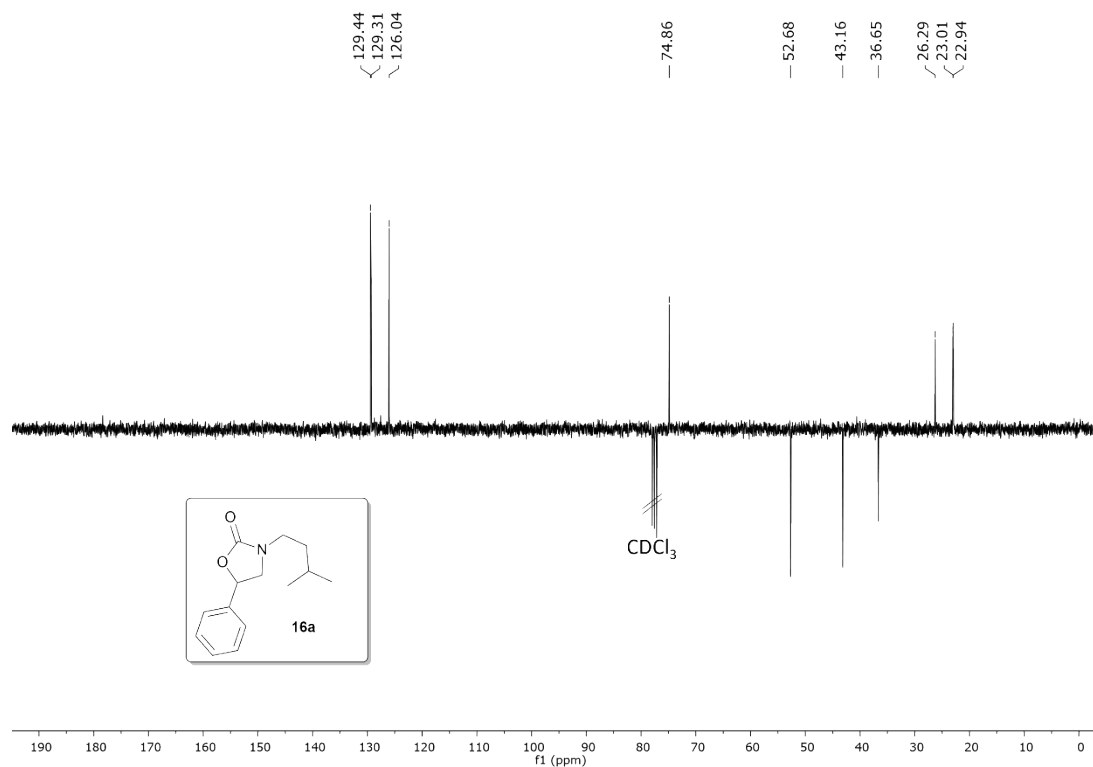

**<sup>1</sup>H NMR spectrum (400 MHz, CDCl<sub>3</sub>, 298K) of 17**

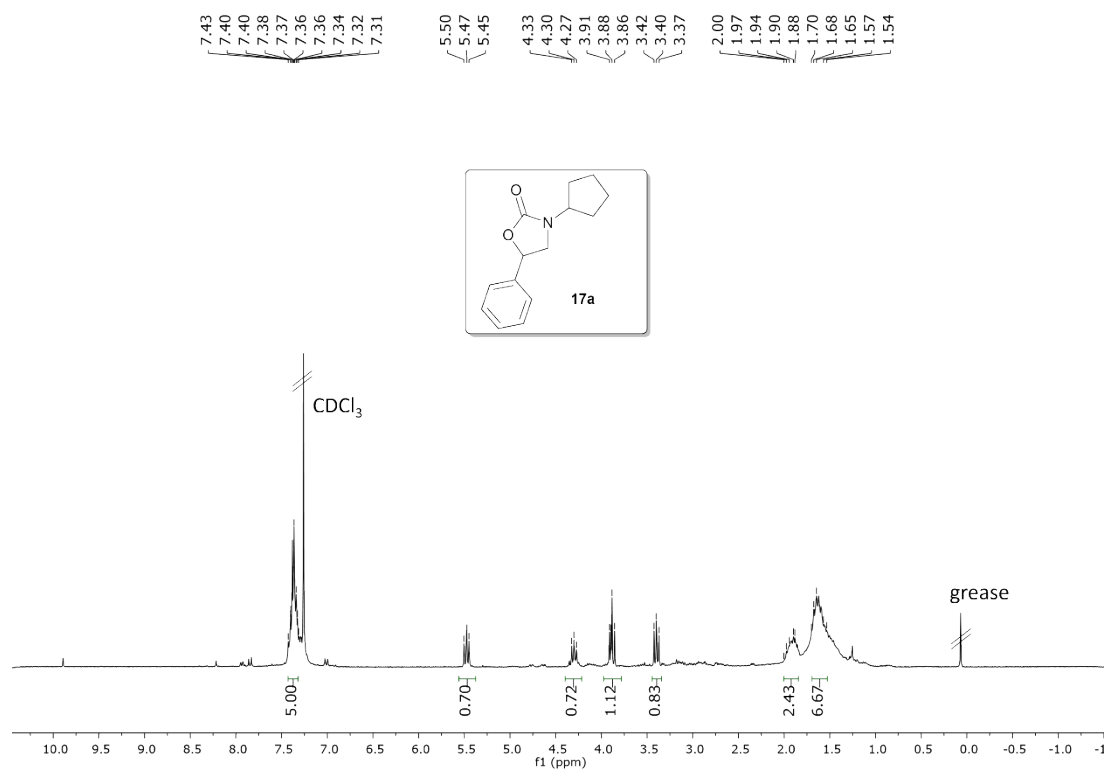

**<sup>13</sup>C NMR spectrum (101 MHz, CDCl<sub>3</sub>, 298K) of 17**

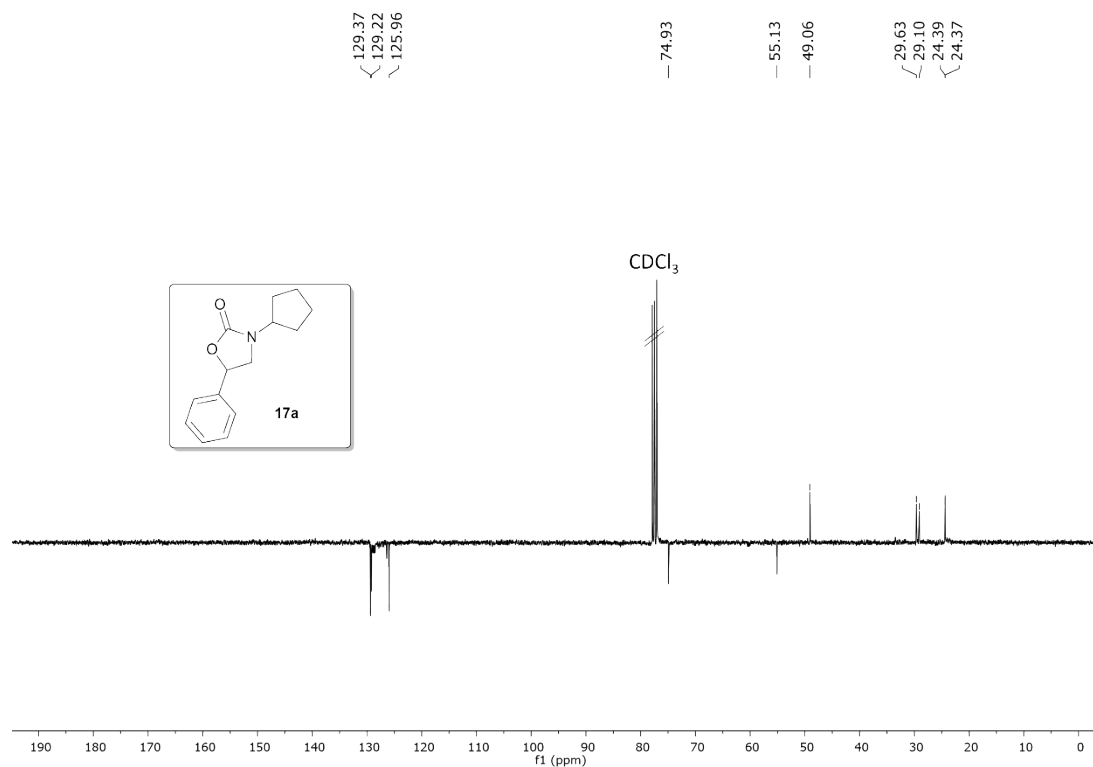

**<sup>1</sup>H NMR spectrum (400 MHz, CDCl<sub>3</sub>, 298K) of 18**

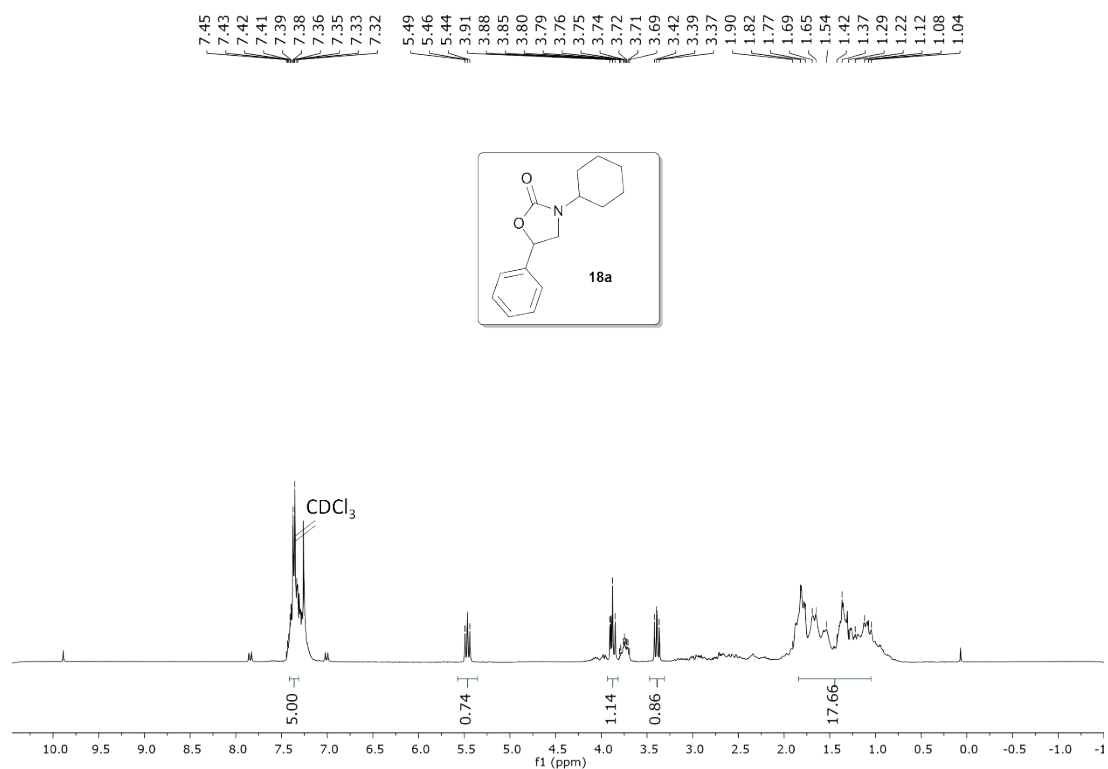



**$^{13}\text{C}$  NMR spectrum (101 MHz,  $\text{CDCl}_3$ , 298K) of 18**

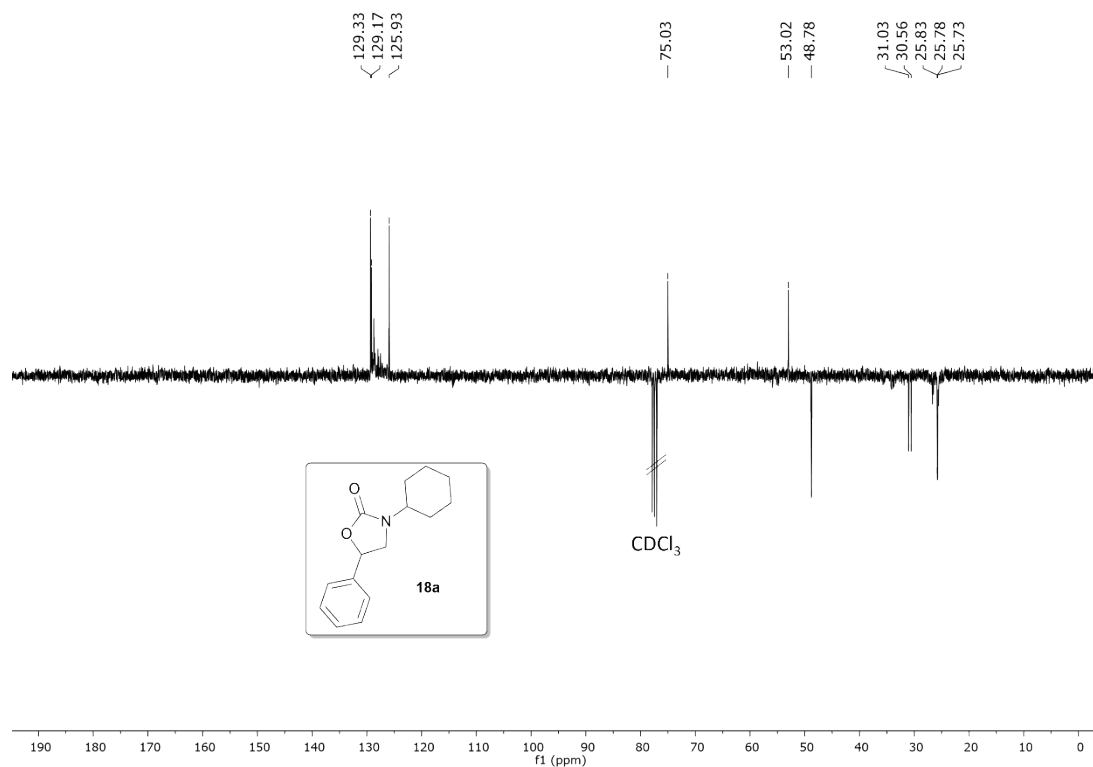

**$^1\text{H}$  NMR spectrum (400 MHz,  $\text{CDCl}_3$ , 298K) of 19**

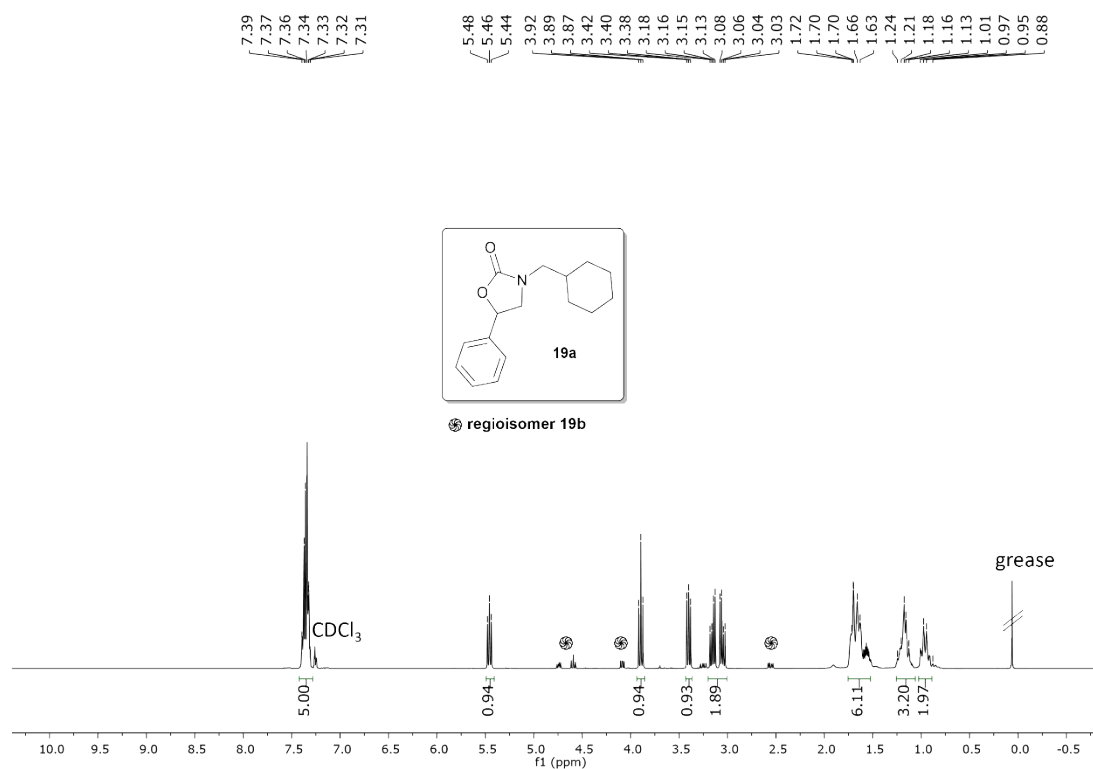

**<sup>13</sup>C NMR spectrum (101 MHz, CDCl<sub>3</sub>, 298K) of 19**

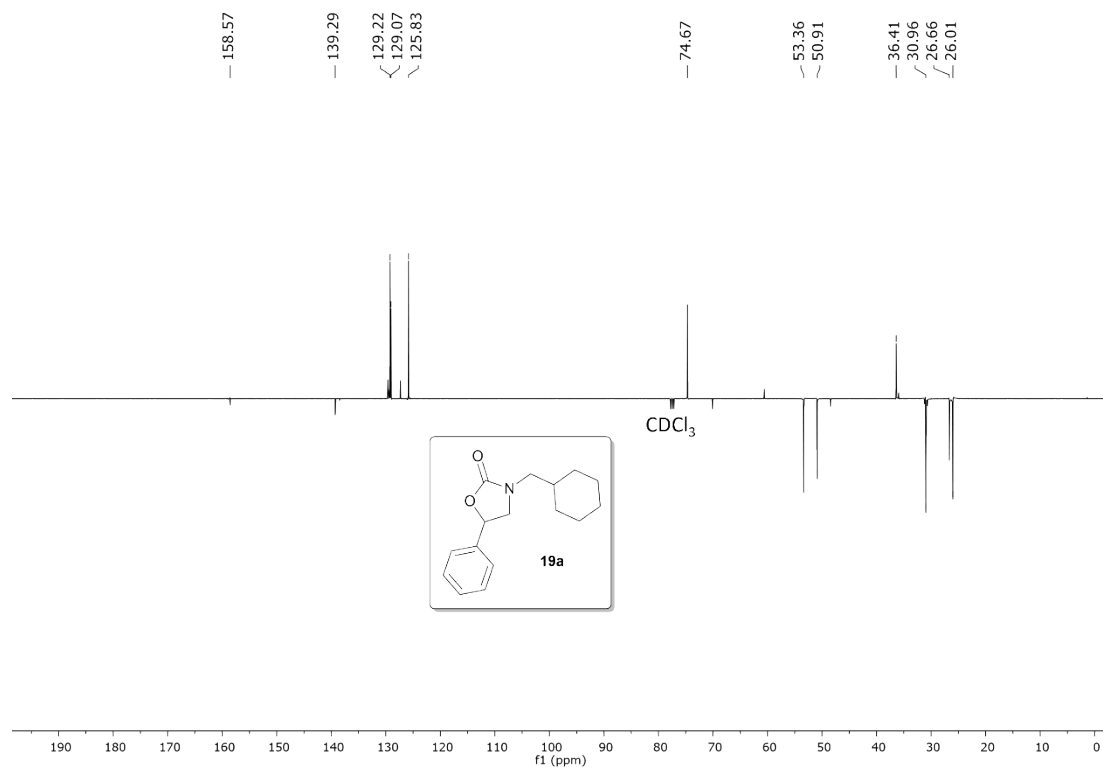

**<sup>1</sup>H NMR spectrum (400 MHz, CDCl<sub>3</sub>, 298K) of 20**

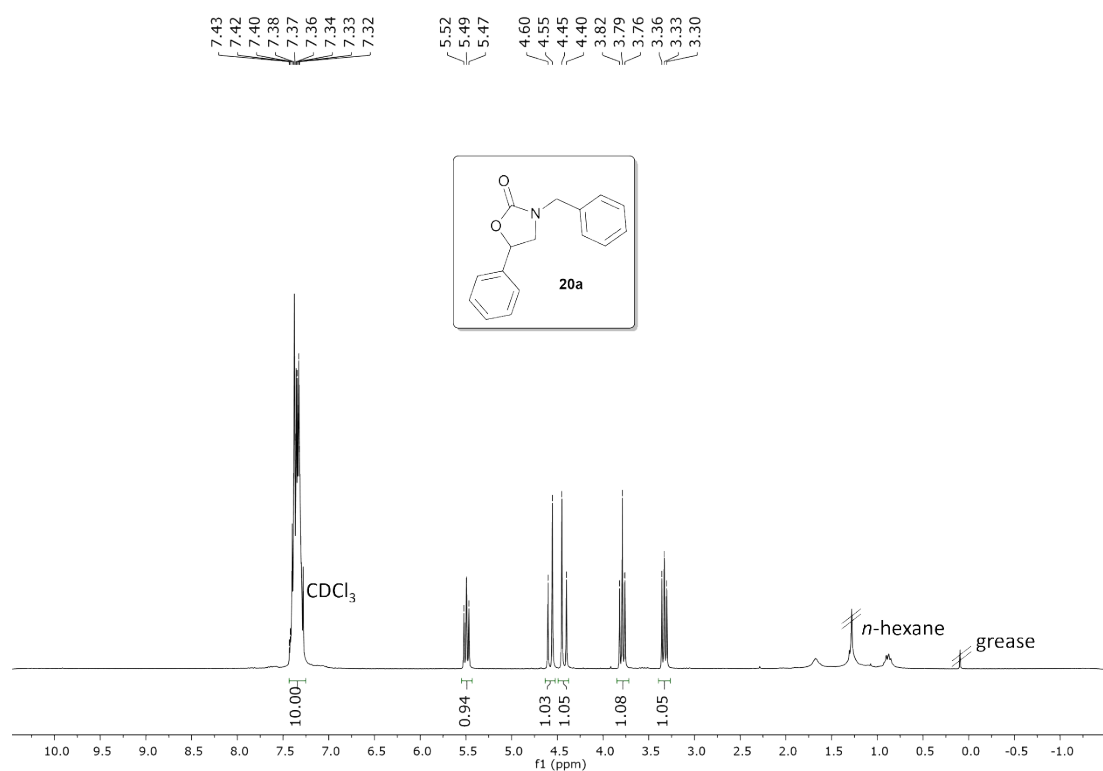

**<sup>13</sup>C NMR spectrum (101 MHz, CDCl<sub>3</sub>, 298K) of 20**

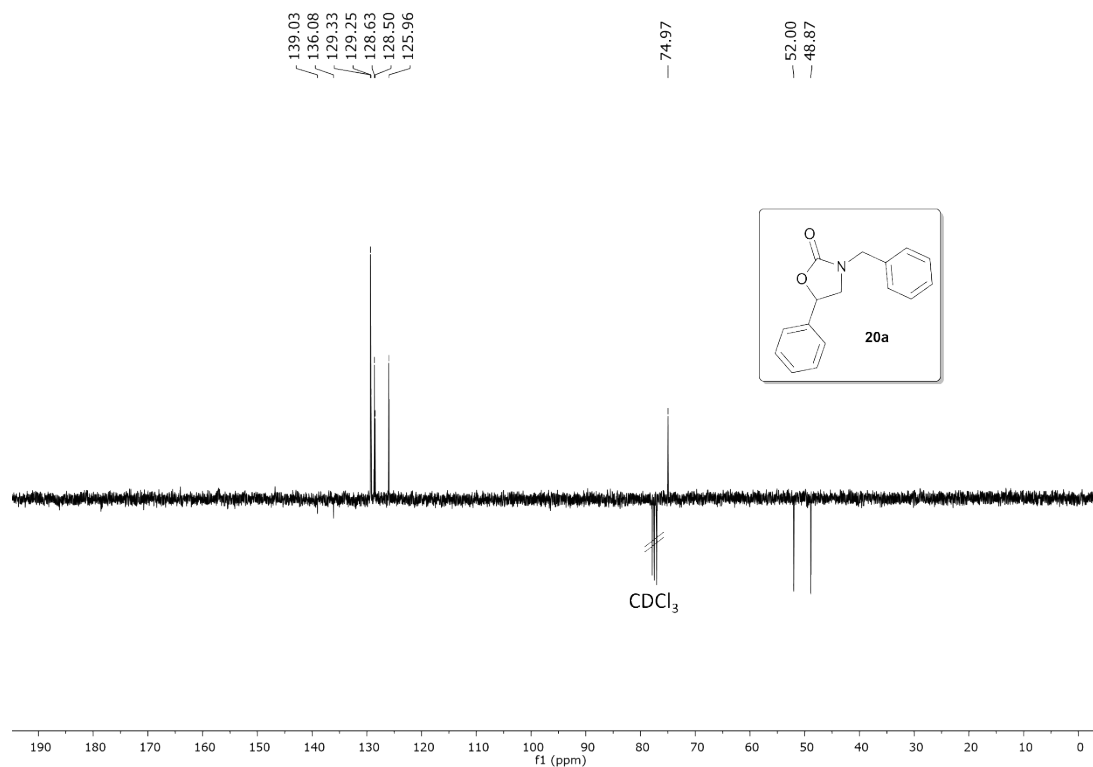

**<sup>1</sup>H NMR spectrum (400 MHz, CDCl<sub>3</sub>, 298K) of 21**

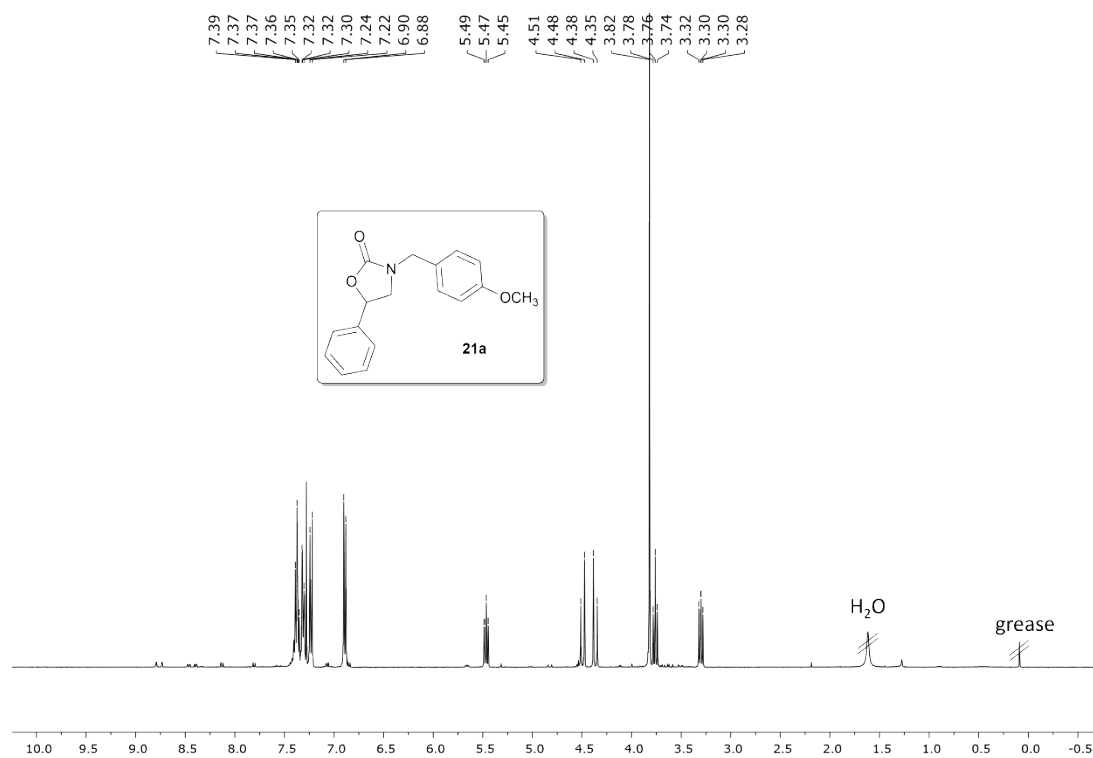

**<sup>13</sup>C NMR spectrum (101 MHz, CDCl<sub>3</sub>, 298K) of 21**

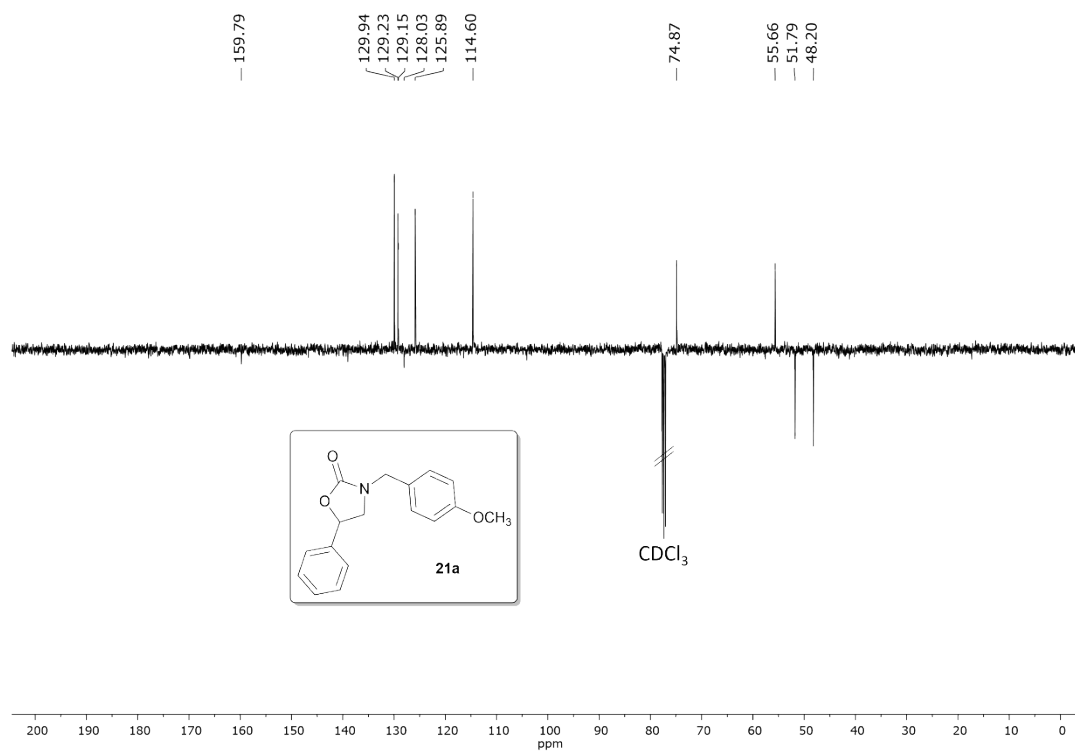

**<sup>1</sup>H NMR spectrum (400 MHz, CDCl<sub>3</sub>, 298K) of 22**

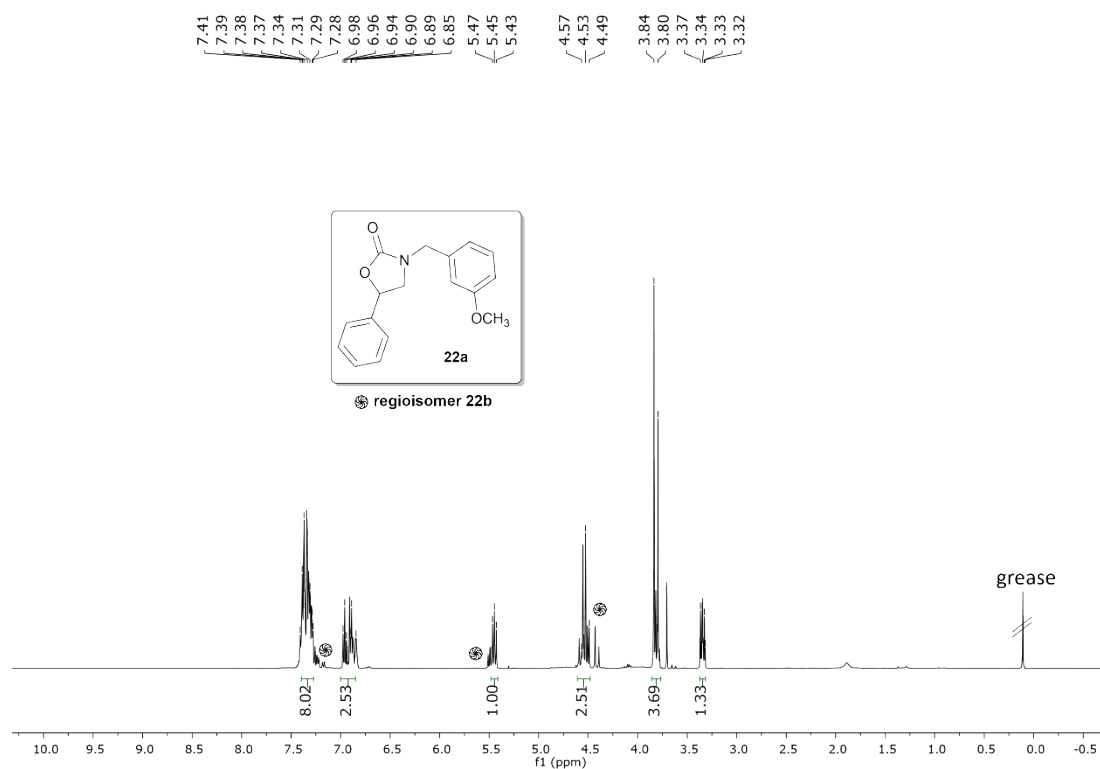

### $^{13}\text{C}$ NMR spectrum (101 MHz, $\text{CDCl}_3$ , 298K) of 22

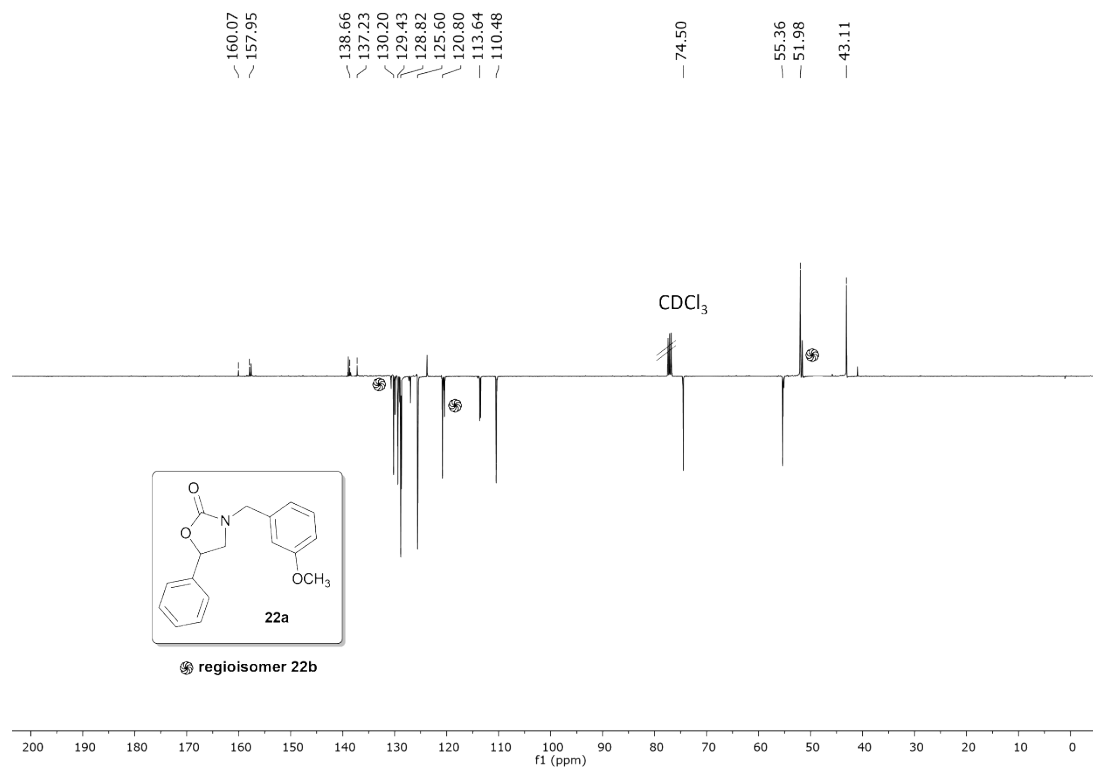

### 10. Computational data

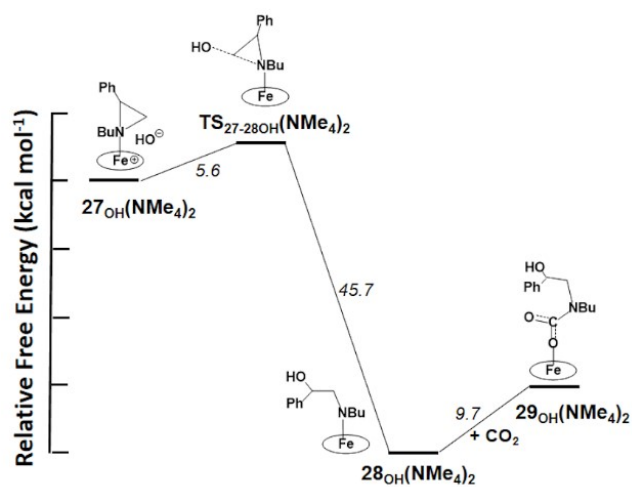

**Figure S17:** Free Energy (kcal mol<sup>-1</sup>) reaction pathway for CO<sub>2</sub> activation catalyzed by 27<sub>OH</sub>(NMe<sub>4</sub>)<sub>2</sub>.

**Table S1.** Relative stability in kcal mol<sup>-1</sup> of the spin-isomers of the different starting compounds.

| Spin-isomer | 2     | 3(NMe <sub>4</sub> ) <sub>2</sub> |
|-------------|-------|-----------------------------------|
| sextet      | 0     | 0                                 |
| quartet     | +10.3 | +13.7                             |
| doublet     | +21.7 | +18.9                             |

**Cartesian coordinates and free energies of all the structures optimized in the computational analysis (B97D level of theory) in DCE solution**

Compound **2**<sub>sext</sub>

**Cartesian Coordinates**

|    |         |         |         |   |         |         |         |
|----|---------|---------|---------|---|---------|---------|---------|
| Fe | 1.0600  | -0.0729 | 0.1484  | H | -0.9955 | -5.5275 | -1.3274 |
| N  | -0.3009 | 1.3783  | -0.4999 | H | -1.4040 | -5.4780 | 0.3928  |
| N  | -0.3465 | -1.5193 | -0.4330 | H | -2.6844 | -5.2947 | -0.8230 |
| C  | 1.0580  | -3.5249 | -0.2502 | C | -3.8728 | -2.7092 | -0.8847 |
| C  | 1.1572  | 3.3499  | -0.3691 | H | -4.2479 | -1.9827 | -1.6160 |
| C  | -0.1687 | -2.8832 | -0.4049 | H | -4.1219 | -3.7043 | -1.2685 |
| C  | -2.3207 | 2.4764  | -0.7797 | C | -4.6038 | -2.4868 | 0.4525  |
| C  | -2.3901 | -2.5693 | -0.7227 | H | -4.3125 | -1.5218 | 0.8905  |
| C  | -1.6878 | -1.3022 | -0.6271 | H | -4.3065 | -3.2544 | 1.1812  |
| C  | -1.6525 | 1.1930  | -0.6673 | C | -6.1203 | -2.5116 | 0.3248  |
| C  | -1.3478 | 3.4410  | -0.6718 | C | -3.8020 | 2.6525  | -0.9161 |
| C  | -2.2877 | -0.0466 | -0.7340 | H | -4.2085 | 1.9285  | -1.6332 |
| C  | -1.4456 | -3.5571 | -0.5801 | H | -4.0333 | 3.6499  | -1.3051 |
| C  | -0.0874 | 2.7371  | -0.5019 | C | -4.5134 | 2.4602  | 0.4363  |
| C  | 2.3924  | 2.7150  | -0.2085 | H | -4.2342 | 1.4941  | 0.8795  |
| N  | 2.5671  | 1.3560  | -0.1548 | H | -4.1876 | 3.2293  | 1.1513  |
| C  | 2.3129  | -2.9214 | -0.1106 | C | -6.0310 | 2.5170  | 0.3344  |
| N  | 2.5279  | -1.5616 | -0.0807 | C | 3.8514  | 4.8320  | -0.1065 |
| C  | 3.8807  | -1.3745 | 0.0529  | C | 4.9862  | 5.5171  | -0.3497 |
| C  | 4.5599  | -2.6655 | 0.1035  | C | 5.9962  | -2.8293 | 0.2551  |
| C  | 3.5676  | -3.6309 | 0.0064  | C | 6.7250  | -3.9267 | -0.0292 |
| C  | 4.5122  | -0.1299 | 0.0963  | H | 2.9526  | 5.4137  | 0.1024  |
| C  | 3.9189  | 1.1314  | 0.0016  | H | 5.9224  | 5.0281  | -0.6039 |
| C  | 4.6336  | 2.3882  | 0.0409  | H | 4.9861  | 6.6048  | -0.3157 |
| C  | 3.6816  | 3.3887  | -0.0979 | H | 6.5329  | -1.9600 | 0.6375  |
| H  | -3.3610 | -0.0336 | -0.9005 | H | 6.2871  | -4.8283 | -0.4478 |
| H  | 1.1599  | 4.4349  | -0.4044 | H | 7.8001  | -3.9279 | 0.1402  |
| H  | 5.5927  | -0.1403 | 0.1941  | O | -6.7049 | 2.2928  | 1.5031  |
| H  | 1.0351  | -4.6105 | -0.2593 | O | -6.6628 | 2.7380  | -0.6753 |
| C  | 6.1086  | 2.5471  | 0.2323  | O | -6.8090 | -2.2765 | 1.4827  |
| H  | 6.3181  | 3.4163  | 0.8693  | O | -6.7395 | -2.7161 | -0.6962 |
| H  | 6.5548  | 1.6616  | 0.6978  | C | -1.5071 | 4.9293  | -0.7016 |
| H  | 6.6233  | 2.7181  | -0.7251 | H | -2.5406 | 5.2080  | -0.9349 |
| C  | 3.7266  | -5.1179 | 0.0430  | H | -1.2471 | 5.3751  | 0.2694  |
| H  | 2.7957  | -5.6175 | 0.3324  | H | -0.8494 | 5.3858  | -1.4540 |
| H  | 4.0290  | -5.5147 | -0.9378 | H | -6.0819 | 2.1280  | 2.2302  |
| H  | 4.5098  | -5.4000 | 0.7588  | H | -6.1953 | -2.1281 | 2.2211  |
| C  | -1.6452 | -5.0409 | -0.5868 | O | 0.8333  | 0.0617  | 1.9954  |

|   |         |        |        |   |        |        |        |
|---|---------|--------|--------|---|--------|--------|--------|
| C | 0.7185  | 1.2759 | 2.7090 | H | 0.6045 | 1.0676 | 3.7856 |
| H | -0.1578 | 1.8548 | 2.3680 | H | 1.6133 | 1.9066 | 2.5659 |

Free Energy: -2073.074253 hartrees

Compound **2<sub>quart</sub>**  
**Cartesian Coordinates**

|    |         |         |         |   |         |         |         |
|----|---------|---------|---------|---|---------|---------|---------|
| Fe | 1.0771  | -0.0755 | -0.0359 | H | -2.6613 | -5.2741 | -0.7652 |
| N  | -0.2853 | 1.3533  | -0.4853 | C | -3.8527 | -2.6914 | -0.8620 |
| N  | -0.3204 | -1.4881 | -0.4476 | H | -4.2362 | -1.9661 | -1.5899 |
| C  | 1.0592  | -3.5072 | -0.2397 | H | -4.1008 | -3.6870 | -1.2453 |
| C  | 1.1423  | 3.3430  | -0.3202 | C | -4.5736 | -2.4739 | 0.4814  |
| C  | -0.1519 | -2.8554 | -0.4012 | H | -4.2776 | -1.5117 | 0.9221  |
| C  | -2.3098 | 2.4574  | -0.7597 | H | -4.2727 | -3.2454 | 1.2045  |
| C  | -2.3690 | -2.5494 | -0.7120 | C | -6.0910 | -2.4956 | 0.3633  |
| C  | -1.6681 | -1.2848 | -0.6333 | C | -3.7905 | 2.6313  | -0.9043 |
| C  | -1.6398 | 1.1783  | -0.6590 | H | -4.1927 | 1.9092  | -1.6254 |
| C  | -1.3409 | 3.4204  | -0.6330 | H | -4.0187 | 3.6292  | -1.2934 |
| C  | -2.2845 | -0.0464 | -0.7372 | C | -4.5097 | 2.4376  | 0.4438  |
| C  | -1.4244 | -3.5325 | -0.5611 | H | -4.2310 | 1.4725  | 0.8891  |
| C  | -0.0846 | 2.7163  | -0.4660 | H | -4.1900 | 3.2076  | 1.1604  |
| C  | 2.3639  | 2.6982  | -0.1691 | C | -6.0267 | 2.4910  | 0.3318  |
| N  | 2.5356  | 1.3351  | -0.1432 | C | 3.8078  | 4.8214  | -0.0292 |
| C  | 2.2988  | -2.8898 | -0.1101 | C | 4.9344  | 5.5101  | -0.2963 |
| N  | 2.5045  | -1.5255 | -0.1063 | C | 5.9723  | -2.7967 | 0.2928  |
| C  | 3.8593  | -1.3476 | 0.0479  | C | 6.7020  | -3.8890 | -0.0056 |
| C  | 4.5374  | -2.6338 | 0.1217  | H | 2.9162  | 5.3973  | 0.2217  |
| C  | 3.5480  | -3.5983 | 0.0295  | H | 5.8597  | 5.0240  | -0.5927 |
| C  | 4.5012  | -0.1186 | 0.1045  | H | 4.9384  | 6.5968  | -0.2393 |
| C  | 3.8913  | 1.1260  | 0.0186  | H | 6.5032  | -1.9370 | 0.7036  |
| C  | 4.6000  | 2.3815  | 0.0803  | H | 6.2665  | -4.7782 | -0.4529 |
| C  | 3.6450  | 3.3767  | -0.0448 | H | 7.7741  | -3.8991 | 0.1810  |
| H  | -3.3574 | -0.0354 | -0.8997 | O | -6.7078 | 2.2651  | 1.4958  |
| H  | 1.1410  | 4.4276  | -0.3367 | O | -6.6519 | 2.7107  | -0.6823 |
| H  | 5.5796  | -0.1274 | 0.2132  | O | -6.7718 | -2.2657 | 1.5267  |
| H  | 1.0354  | -4.5919 | -0.2296 | O | -6.7167 | -2.6931 | -0.6549 |
| C  | 6.0738  | 2.5416  | 0.2800  | C | -1.4995 | 4.9088  | -0.6445 |
| H  | 6.2777  | 3.4267  | 0.8960  | H | -2.5359 | 5.1880  | -0.8631 |
| H  | 6.5143  | 1.6681  | 0.7728  | H | -1.2288 | 5.3439  | 0.3282  |
| H  | 6.5973  | 2.6861  | -0.6770 | H | -0.8513 | 5.3739  | -1.3999 |
| C  | 3.7023  | -5.0847 | 0.0945  | H | -6.0897 | 2.1014  | 2.2273  |
| H  | 2.7809  | -5.5738 | 0.4288  | H | -6.1532 | -2.1227 | 2.2622  |
| H  | 3.9679  | -5.5057 | -0.8868 | O | 0.8512  | -0.0029 | 1.8663  |
| H  | 4.5091  | -5.3515 | 0.7890  | C | 0.7429  | 1.2040  | 2.5785  |
| C  | -1.6193 | -5.0167 | -0.5464 | H | -0.1306 | 1.7969  | 2.2460  |
| H  | -0.9795 | -5.5112 | -1.2902 | H | 0.6291  | 1.0021  | 3.6591  |
| H  | -1.3640 | -5.4407 | 0.4352  | H | 1.6372  | 1.8411  | 2.4406  |

Free Energy: -2073.057781 hartrees

Compound **2<sub>dou</sub>**  
**Cartesian Coordinates**

|    |         |         |         |   |         |         |         |
|----|---------|---------|---------|---|---------|---------|---------|
| Fe | 1.0787  | -0.0648 | -0.1212 | C | -0.1492 | -2.8398 | -0.5143 |
| N  | -0.2692 | 1.3587  | -0.5232 | C | -2.3004 | 2.4775  | -0.7398 |
| N  | -0.3109 | -1.4672 | -0.5161 | C | -2.3707 | -2.5255 | -0.7589 |
| C  | 1.0566  | -3.4994 | -0.3545 | C | -1.6674 | -1.2648 | -0.6466 |
| C  | 1.1648  | 3.3448  | -0.4418 | C | -1.6328 | 1.1954  | -0.6335 |

|   |         |         |         |   |         |         |         |
|---|---------|---------|---------|---|---------|---------|---------|
| C | -1.3226 | 3.4351  | -0.6903 | H | -4.2546 | -1.5258 | 0.9374  |
| C | -2.2849 | -0.0250 | -0.6882 | H | -4.2331 | -3.2656 | 1.1798  |
| C | -1.4230 | -3.5122 | -0.6762 | C | -6.0721 | -2.5087 | 0.3915  |
| C | -0.0661 | 2.7246  | -0.5522 | C | -3.7853 | 2.6538  | -0.8272 |
| C | 2.3752  | 2.6943  | -0.2428 | H | -4.2164 | 1.9332  | -1.5333 |
| N | 2.5239  | 1.3259  | -0.1626 | H | -4.0270 | 3.6527  | -1.2056 |
| C | 2.2862  | -2.8877 | -0.1480 | C | -4.4543 | 2.4592  | 0.5464  |
| N | 2.4813  | -1.5214 | -0.0898 | H | -4.1598 | 1.4938  | 0.9813  |
| C | 3.8239  | -1.3539 | 0.1607  | H | -4.1083 | 3.2287  | 1.2512  |
| C | 4.5016  | -2.6427 | 0.2406  | C | -5.9745 | 2.5090  | 0.4902  |
| C | 3.5262  | -3.6026 | 0.0473  | C | 3.8338  | 4.8072  | -0.1059 |
| C | 4.4603  | -0.1279 | 0.2640  | C | 4.9848  | 5.4737  | -0.3217 |
| C | 3.8655  | 1.1166  | 0.1044  | C | 5.9225  | -2.8073 | 0.5011  |
| C | 4.5825  | 2.3662  | 0.1648  | C | 6.6774  | -3.8858 | 0.2139  |
| C | 3.6524  | 3.3651  | -0.0675 | H | 2.9347  | 5.4039  | 0.0538  |
| H | -3.3638 | -0.0090 | -0.8068 | H | 5.9234  | 4.9671  | -0.5287 |
| H | 1.1730  | 4.4284  | -0.4926 | H | 4.9974  | 6.5618  | -0.3127 |
| H | 5.5286  | -0.1378 | 0.4489  | H | 6.4199  | -1.9608 | 0.9767  |
| H | 1.0312  | -4.5840 | -0.3800 | H | 6.2775  | -4.7592 | -0.2939 |
| C | 6.0411  | 2.5207  | 0.4601  | H | 7.7345  | -3.8997 | 0.4721  |
| H | 6.2130  | 3.4295  | 1.0507  | O | -6.6109 | 2.3174  | 1.6854  |
| H | 6.4356  | 1.6651  | 1.0190  | O | -6.6383 | 2.6965  | -0.5057 |
| H | 6.6318  | 2.6188  | -0.4631 | O | -6.7314 | -2.3155 | 1.5740  |
| C | 3.6791  | -5.0909 | 0.0656  | O | -6.7168 | -2.6827 | -0.6192 |
| H | 2.7403  | -5.5918 | 0.3272  | C | -1.4663 | 4.9243  | -0.7517 |
| H | 4.0021  | -5.4769 | -0.9130 | H | -2.5100 | 5.2080  | -0.9256 |
| H | 4.4438  | -5.3844 | 0.7961  | H | -1.1390 | 5.3952  | 0.1865  |
| C | -1.6140 | -4.9967 | -0.7250 | H | -0.8557 | 5.3520  | -1.5590 |
| H | -0.9968 | -5.4538 | -1.5110 | H | -5.9649 | 2.1796  | 2.3977  |
| H | -1.3273 | -5.4667 | 0.2267  | H | -6.0990 | -2.1885 | 2.3006  |
| H | -2.6617 | -5.2478 | -0.9233 | O | 0.8441  | -0.0784 | 1.6672  |
| C | -3.8575 | -2.6619 | -0.8814 | C | 0.5753  | 1.1370  | 2.3450  |
| H | -4.2545 | -1.9167 | -1.5818 | H | -0.4271 | 1.5268  | 2.1043  |
| H | -4.1152 | -3.6465 | -1.2861 | H | 0.6248  | 0.9202  | 3.4252  |
| C | -4.5529 | -2.4798 | 0.4805  | H | 1.3157  | 1.9163  | 2.1074  |

Free Energy: -2073.039577 hartrees

**Compound 3(NMe<sub>4</sub>)<sub>2</sub>sext**  
**Cartesian Coordinates**

|    |         |         |         |   |         |         |         |
|----|---------|---------|---------|---|---------|---------|---------|
| Fe | -2.7493 | -0.0354 | 0.7180  | C | -6.0343 | -2.5890 | -0.5756 |
| N  | -1.2384 | 1.4101  | 0.5760  | C | -5.0679 | -3.5592 | -0.3481 |
| N  | -1.2234 | -1.4684 | 0.5830  | C | -5.9818 | -0.0554 | -0.5441 |
| C  | -2.6183 | -3.4652 | 0.2477  | C | -5.3852 | 1.1999  | -0.4070 |
| C  | -2.6524 | 3.3918  | 0.2259  | C | -6.0617 | 2.4635  | -0.5992 |
| C  | -1.4070 | -2.8332 | 0.5145  | C | -5.1173 | 3.4550  | -0.3723 |
| C  | 0.7787  | 2.5062  | 0.9134  | H | 1.7883  | -0.0127 | 1.1609  |
| C  | 0.8022  | -2.5435 | 0.9359  | H | -2.6395 | 4.4773  | 0.2136  |
| C  | 0.1133  | -1.2681 | 0.8356  | H | -7.0377 | -0.0585 | -0.7924 |
| C  | 0.1019  | 1.2238  | 0.8264  | H | -2.5978 | -4.5508 | 0.2387  |
| C  | -0.1800 | 3.4702  | 0.7047  | C | -7.4921 | 2.6349  | -1.0023 |
| C  | 0.7210  | -0.0184 | 0.9604  | H | -7.5947 | 3.4808  | -1.6945 |
| C  | -0.1467 | -3.5180 | 0.7328  | H | -7.8860 | 1.7371  | -1.4910 |
| C  | -1.4343 | 2.7719  | 0.4956  | H | -8.1318 | 2.8511  | -0.1333 |
| C  | -3.8707 | 2.7676  | -0.0555 | C | -5.2188 | -5.0446 | -0.4442 |
| N  | -4.0631 | 1.4098  | -0.0781 | H | -4.2558 | -5.5395 | -0.6107 |
| C  | -3.8460 | -2.8558 | -0.0314 | H | -5.6566 | -5.4648 | 0.4737  |
| N  | -4.0535 | -1.4938 | -0.0667 | H | -5.8924 | -5.3071 | -1.2705 |
| C  | -5.3708 | -1.3016 | -0.4008 | C | 0.0489  | -5.0023 | 0.6978  |



|   |         |         |         |   |         |         |         |
|---|---------|---------|---------|---|---------|---------|---------|
| H | -0.6878 | -5.5190 | 1.3281  | H | -2.4402 | 0.0287  | 3.1661  |
| H | -0.0654 | -5.3950 | -0.3233 | C | 5.1597  | 0.0184  | 2.5102  |
| H | 1.0517  | -5.2694 | 1.0495  | H | 5.0475  | 0.0264  | 3.5976  |
| C | 2.2765  | -2.7167 | 1.1263  | H | 4.7306  | 0.9209  | 2.0679  |
| H | 2.6648  | -1.9621 | 1.8214  | H | 4.7402  | -0.8954 | 2.0822  |
| H | 2.4866  | -3.6937 | 1.5767  | C | 6.8261  | 0.0134  | 0.7016  |
| C | 3.0345  | -2.6042 | -0.2119 | H | 6.3537  | 0.9124  | 0.2998  |
| H | 2.8162  | -1.6288 | -0.6690 | H | 7.9009  | 0.0192  | 0.5005  |
| H | 2.6552  | -3.3571 | -0.9171 | H | 6.3658  | -0.8980 | 0.3138  |
| C | 4.5783  | -2.7585 | -0.1273 | C | 7.2654  | 1.2681  | 2.7713  |
| C | 2.2520  | 2.6955  | 1.0957  | H | 7.1078  | 1.2622  | 3.8529  |
| H | 2.6514  | 1.9484  | 1.7924  | H | 8.3335  | 1.2453  | 2.5403  |
| H | 2.4545  | 3.6768  | 1.5400  | H | 6.7767  | 2.1257  | 2.3023  |
| C | 3.0040  | 2.5841  | -0.2461 | C | 7.2785  | -1.2043 | 2.7910  |
| H | 2.7930  | 1.6046  | -0.6979 | H | 7.1199  | -1.1832 | 3.8722  |
| H | 2.6136  | 3.3302  | -0.9526 | H | 6.7995  | -2.0744 | 2.3351  |
| C | 4.5467  | 2.7545  | -0.1705 | H | 8.3466  | -1.1737 | 2.5606  |
| C | -5.2575 | 4.8996  | -0.4503 | C | 6.5799  | -0.0055 | -2.6775 |
| C | -6.4006 | 5.6104  | -0.3859 | H | 6.5046  | -0.9013 | -2.0565 |
| C | -7.4298 | -2.7467 | -0.9494 | H | 7.4983  | -0.0087 | -3.2706 |
| C | -8.1949 | -3.8449 | -0.7912 | H | 6.4948  | 0.9057  | -2.0806 |
| H | -4.3278 | 5.4588  | -0.5650 | C | 5.4619  | 1.2012  | -4.5044 |
| H | -7.3708 | 5.1456  | -0.2344 | H | 6.4053  | 1.1946  | -5.0561 |
| H | -6.3755 | 6.6955  | -0.4655 | H | 4.6141  | 1.1676  | -5.1932 |
| H | -7.9007 | -1.8713 | -1.3989 | H | 5.3954  | 2.0702  | -3.8452 |
| H | -7.8264 | -4.7518 | -0.3199 | C | 4.1243  | -0.0226 | -2.8437 |
| H | -9.2318 | -3.8415 | -1.1215 | H | 3.2940  | -0.0373 | -3.5550 |
| O | 5.1619  | 2.6415  | -1.2755 | H | 4.1342  | -0.9212 | -2.2218 |
| O | 5.0747  | 2.9712  | 0.9570  | H | 4.1229  | 0.8918  | -2.2451 |
| O | 5.1982  | -2.6489 | -1.2301 | C | 5.4769  | -1.2739 | -4.4713 |
| O | 5.1029  | -2.9594 | 1.0048  | H | 5.4189  | -2.1255 | -3.7889 |
| C | 0.0020  | 4.9558  | 0.6559  | H | 4.6299  | -1.2678 | -5.1619 |
| H | 1.0016  | 5.2354  | 1.0068  | H | 6.4212  | -1.2712 | -5.0217 |
| H | -0.1140 | 5.3378  | -0.3691 | N | 5.4116  | -0.0252 | -3.6343 |
| H | -0.7406 | 5.4716  | 1.2800  | N | 6.6377  | 0.0239  | 2.1992  |
| O | -3.1834 | -0.0345 | 2.5476  |   |         |         |         |

Free Energy: -2460.981823 hartrees

Compound **3(NMe<sub>4</sub>)<sub>2</sub>quart**

**Cartesian Coordinates**

|    |         |         |         |   |         |         |         |
|----|---------|---------|---------|---|---------|---------|---------|
| Fe | -2.9650 | -0.2715 | 0.3843  | C | -5.2436 | -2.1874 | -0.3387 |
| N  | -1.9679 | 1.4822  | 0.3856  | C | -5.5522 | -3.6026 | -0.4714 |
| N  | -1.1767 | -1.2323 | 0.2540  | C | -4.3467 | -4.2755 | -0.3520 |
| C  | -1.9822 | -3.5407 | 0.0150  | C | -6.1840 | -1.1697 | -0.4164 |
| C  | -3.8690 | 3.0330  | 0.2048  | C | -5.9211 | 0.1900  | -0.3179 |
| C  | -0.9839 | -2.5966 | 0.1876  | C | -6.9260 | 1.2205  | -0.4301 |
| C  | -0.3129 | 3.0826  | 0.7210  | C | -6.2710 | 2.4270  | -0.2496 |
| C  | 1.0801  | -1.7305 | 0.5122  | H | 1.3678  | 0.9562  | 0.7857  |
| C  | 0.0719  | -0.6897 | 0.4637  | H | -4.1525 | 4.0793  | 0.2456  |
| C  | -0.6140 | 1.6732  | 0.5812  | H | -7.2176 | -1.4592 | -0.5671 |
| C  | -1.5082 | 3.7502  | 0.5976  | H | -1.6741 | -4.5808 | -0.0042 |
| C  | 0.3356  | 0.6634  | 0.6233  | C | -8.3755 | 0.9964  | -0.7246 |
| C  | 0.4188  | -2.9203 | 0.3335  | H | -8.7593 | 1.7972  | -1.3697 |
| C  | -2.5262 | 2.7457  | 0.3925  | H | -8.5448 | 0.0370  | -1.2255 |
| C  | -4.8680 | 2.1000  | -0.0408 | H | -8.9795 | 1.0056  | 0.1952  |
| N  | -4.6758 | 0.7416  | -0.0954 | C | -4.1004 | -5.7470 | -0.4630 |
| C  | -3.3370 | -3.2694 | -0.1388 | H | -3.0703 | -5.9639 | -0.7660 |
| N  | -3.8957 | -2.0063 | -0.1304 | H | -4.2825 | -6.2586 | 0.4940  |

|   |         |         |         |   |         |         |         |
|---|---------|---------|---------|---|---------|---------|---------|
| H | -4.7810 | -6.1912 | -1.2005 | C | -1.7410 | 5.2289  | 0.6271  |
| C | 1.0029  | -4.2977 | 0.2728  | H | -0.8479 | 5.7509  | 0.9880  |
| H | 0.4467  | -4.9992 | 0.9092  | H | -1.9733 | 5.6155  | -0.3761 |
| H | 0.9779  | -4.6970 | -0.7519 | H | -2.5839 | 5.4910  | 1.2806  |
| H | 2.0479  | -4.2865 | 0.6025  | O | -3.2360 | -0.4097 | 2.2932  |
| C | 2.5556  | -1.5263 | 0.6608  | H | -2.7573 | 0.2910  | 2.7615  |
| H | 2.7683  | -0.6279 | 1.2521  | C | 8.4614  | -2.3583 | -1.0824 |
| H | 2.9888  | -2.3695 | 1.2120  | H | 7.4685  | -1.9021 | -1.1753 |
| C | 3.2628  | -1.4178 | -0.7048 | H | 9.2556  | -1.6224 | -1.2319 |
| H | 2.8944  | -0.5364 | -1.2494 | H | 8.5747  | -3.1873 | -1.7857 |
| H | 3.0014  | -2.2856 | -1.3267 | C | 9.9371  | -3.5895 | 0.4661  |
| C | 4.8104  | -1.3304 | -0.6447 | H | 10.0134 | -3.9763 | 1.4850  |
| C | 1.0485  | 3.6829  | 0.8781  | H | 9.9949  | -4.4042 | -0.2596 |
| H | 1.7177  | 3.0008  | 1.4156  | H | 10.7190 | -2.8503 | 0.2767  |
| H | 0.9829  | 4.5941  | 1.4846  | C | 8.4842  | -1.7840 | 1.3104  |
| C | 1.6754  | 4.0435  | -0.4840 | H | 7.4976  | -1.3333 | 1.1692  |
| H | 1.8104  | 3.1312  | -1.0837 | H | 8.5887  | -2.2054 | 2.3134  |
| H | 0.9815  | 4.6780  | -1.0533 | H | 9.2892  | -1.0731 | 1.1089  |
| C | 3.0467  | 4.7777  | -0.4143 | C | 7.4928  | -3.9074 | 0.5650  |
| C | -6.7986 | 3.7812  | -0.2860 | H | 7.6221  | -4.3121 | 1.5718  |
| C | -8.0809 | 4.1555  | -0.1100 | H | 6.5468  | -3.3674 | 0.4774  |
| C | -6.8829 | -4.1336 | -0.7198 | H | 7.5744  | -4.7016 | -0.1810 |
| C | -7.3093 | -5.3877 | -0.4745 | N | 8.6014  | -2.9135 | 0.3150  |
| H | -6.0679 | 4.5697  | -0.4711 | C | 6.5880  | 3.8022  | -0.4965 |
| H | -8.8712 | 3.4453  | 0.1167  | H | 7.2070  | 3.9849  | -1.3786 |
| H | -8.3579 | 5.2060  | -0.1723 | H | 5.7112  | 4.4569  | -0.4866 |
| H | -7.6042 | -3.4331 | -1.1426 | H | 7.1787  | 3.9153  | 0.4162  |
| H | -6.6733 | -6.1416 | -0.0186 | C | 5.2796  | 2.1846  | -1.8126 |
| H | -8.3314 | -5.6755 | -0.7128 | H | 5.9260  | 2.4006  | -2.6675 |
| O | 3.5642  | 5.0613  | -1.5363 | H | 4.9507  | 1.1437  | -1.8436 |
| O | 3.5506  | 5.0088  | 0.7221  | H | 4.4488  | 2.8934  | -1.7820 |
| O | 5.4018  | -1.2315 | -1.7600 | C | 5.2556  | 2.0825  | 0.6549  |
| O | 5.3731  | -1.3445 | 0.4917  | H | 4.9216  | 1.0452  | 0.5934  |
| H | 5.8848  | 2.2222  | 1.5380  |   |         |         |         |
| H | 4.4265  | 2.7924  | 0.6707  | H | 6.8801  | 0.4107  | -0.6369 |
| C | 7.2736  | 1.4295  | -0.5872 | H | 7.8756  | 1.6603  | -1.4697 |
| H | 7.8564  | 1.5871  | 0.3238  | N | 6.1023  | 2.3758  | -0.5603 |

Free Energy: -2460.960015 hartrees

**Compound 3(NMe<sub>4</sub>)<sub>2dou</sub>**  
**Cartesian Coordinates**

|    |         |         |         |   |         |         |         |
|----|---------|---------|---------|---|---------|---------|---------|
| Fe | -2.9865 | -0.3115 | 0.3724  | N | -4.6758 | 0.7416  | -0.0954 |
| N  | -1.9679 | 1.4822  | 0.3856  | C | -3.3370 | -3.2694 | -0.1388 |
| N  | -1.3094 | -1.1610 | 0.2637  | N | -3.8957 | -2.0063 | -0.1304 |
| C  | -1.9822 | -3.5407 | 0.0150  | C | -5.2436 | -2.1874 | -0.3387 |
| C  | -3.8690 | 3.0330  | 0.2048  | C | -5.5522 | -3.6026 | -0.4714 |
| C  | -0.9839 | -2.5966 | 0.1876  | C | -4.3467 | -4.2755 | -0.3520 |
| C  | -0.3129 | 3.0826  | 0.7210  | C | -6.1840 | -1.1697 | -0.4164 |
| C  | 1.0801  | -1.7305 | 0.5122  | C | -5.9211 | 0.1900  | -0.3179 |
| C  | 0.0719  | -0.6897 | 0.4637  | C | -6.9260 | 1.2205  | -0.4301 |
| C  | -0.6140 | 1.6732  | 0.5812  | C | -6.2710 | 2.4270  | -0.2496 |
| C  | -1.5082 | 3.7502  | 0.5976  | H | 1.3678  | 0.9562  | 0.7857  |
| C  | 0.3356  | 0.6634  | 0.6233  | H | -4.1525 | 4.0793  | 0.2456  |
| C  | 0.4188  | -2.9203 | 0.3335  | H | -7.2176 | -1.4592 | -0.5671 |
| C  | -2.5262 | 2.7457  | 0.3925  | H | -1.6741 | -4.5808 | -0.0042 |
| C  | -4.8680 | 2.1000  | -0.0408 | C | -8.3755 | 0.9964  | -0.7246 |

|   |         |         |         |   |         |         |         |
|---|---------|---------|---------|---|---------|---------|---------|
| H | -8.7593 | 1.7972  | -1.3697 | H | -0.8479 | 5.7509  | 0.9880  |
| H | -8.5448 | 0.0370  | -1.2255 | H | -1.9733 | 5.6155  | -0.3761 |
| H | -8.9795 | 1.0056  | 0.1952  | H | -2.5839 | 5.4910  | 1.2806  |
| C | -4.1004 | -5.7470 | -0.4630 | O | -3.2273 | -0.4053 | 2.2322  |
| H | -3.0703 | -5.9639 | -0.7660 | H | -2.7486 | 0.2954  | 2.7005  |
| H | -4.2825 | -6.2586 | 0.4940  | C | 8.4850  | -2.3990 | -1.0827 |
| H | -4.7810 | -6.1912 | -1.2005 | H | 7.4921  | -1.9428 | -1.1756 |
| C | 1.0029  | -4.2977 | 0.2728  | H | 9.2792  | -1.6631 | -1.2322 |
| H | 0.4467  | -4.9992 | 0.9092  | H | 8.5983  | -3.2280 | -1.7860 |
| H | 0.9779  | -4.6970 | -0.7519 | C | 9.9607  | -3.6302 | 0.4658  |
| H | 2.0479  | -4.2865 | 0.6025  | H | 10.0370 | -4.0170 | 1.4847  |
| C | 2.5556  | -1.5263 | 0.6608  | H | 10.0185 | -4.4449 | -0.2599 |
| H | 2.7683  | -0.6279 | 1.2521  | H | 10.7426 | -2.8910 | 0.2764  |
| H | 2.9888  | -2.3695 | 1.2120  | C | 8.5078  | -1.8247 | 1.3101  |
| C | 3.2628  | -1.4178 | -0.7048 | H | 7.5212  | -1.3740 | 1.1689  |
| H | 2.8944  | -0.5364 | -1.2494 | H | 8.6123  | -2.2461 | 2.3131  |
| H | 3.0014  | -2.2856 | -1.3267 | H | 9.3128  | -1.1138 | 1.1086  |
| C | 4.8104  | -1.3304 | -0.6447 | C | 7.5164  | -3.9481 | 0.5647  |
| C | 1.0485  | 3.6829  | 0.8781  | H | 7.6457  | -4.3528 | 1.5715  |
| H | 1.7177  | 3.0008  | 1.4156  | H | 6.5704  | -3.4081 | 0.4771  |
| H | 0.9829  | 4.5941  | 1.4846  | H | 7.5980  | -4.7423 | -0.1813 |
| C | 1.6754  | 4.0435  | -0.4840 | N | 8.6250  | -2.9542 | 0.3147  |
| H | 1.8104  | 3.1312  | -1.0837 | C | 6.5880  | 3.8022  | -0.4965 |
| H | 0.9815  | 4.6780  | -1.0533 | H | 7.2070  | 3.9849  | -1.3786 |
| C | 3.0467  | 4.7777  | -0.4143 | H | 5.7112  | 4.4569  | -0.4866 |
| C | -6.7986 | 3.7812  | -0.2860 | H | 7.1787  | 3.9153  | 0.4162  |
| C | -8.0809 | 4.1555  | -0.1100 | C | 5.2796  | 2.1846  | -1.8126 |
| C | -6.8829 | -4.1336 | -0.7198 | H | 5.9260  | 2.4006  | -2.6675 |
| C | -7.3093 | -5.3877 | -0.4745 | H | 4.9507  | 1.1437  | -1.8436 |
| H | -6.0679 | 4.5697  | -0.4711 | H | 4.4488  | 2.8934  | -1.7820 |
| H | -8.8712 | 3.4453  | 0.1167  | C | 5.2556  | 2.0825  | 0.6549  |
| H | -8.3579 | 5.2060  | -0.1723 | H | 4.9216  | 1.0452  | 0.5934  |
| H | -7.6042 | -3.4331 | -1.1426 | H | 5.8848  | 2.2222  | 1.5380  |
| H | -6.6733 | -6.1416 | -0.0186 | H | 4.4265  | 2.7924  | 0.6707  |
| H | -8.3314 | -5.6755 | -0.7128 | C | 7.2736  | 1.4295  | -0.5872 |
| O | 3.5642  | 5.0613  | -1.5363 | H | 7.8564  | 1.5871  | 0.3238  |
| O | 3.5506  | 5.0088  | 0.7221  | H | 6.8801  | 0.4107  | -0.6369 |
| O | 5.4018  | -1.2315 | -1.7600 | H | 7.8756  | 1.6603  | -1.4697 |
| O | 5.3731  | -1.3445 | 0.4917  | N | 6.1023  | 2.3758  | -0.5603 |
| C | -1.7410 | 5.2289  | 0.6271  |   |         |         |         |

Free Energy: -2460.952180 hartrees

**Compound *N*-butyl-2-phenyl aziridine  
Cartesian Coordinates**

|   |           |           |          |   |           |           |          |
|---|-----------|-----------|----------|---|-----------|-----------|----------|
| C | 0.764614  | 0.757065  | 2.782264 | C | -0.289807 | -2.834513 | 5.299795 |
| C | -0.205786 | -0.314871 | 2.411974 | H | 0.685559  | -0.943502 | 4.988927 |
| H | 0.561315  | 1.790299  | 2.496297 | C | -1.715768 | -3.609421 | 3.506367 |
| H | 1.316853  | 0.643260  | 3.717799 | H | -1.833023 | -2.321581 | 1.778772 |
| H | -1.042106 | -0.030089 | 1.770663 | C | -1.158234 | -3.799458 | 4.777007 |
| N | 1.098846  | -0.168231 | 1.693006 | H | 0.140820  | -2.968060 | 6.290535 |
| C | -0.521370 | -1.491706 | 3.278108 | H | -2.397219 | -4.350356 | 3.092210 |
| C | 0.022187  | -1.689108 | 4.559039 | H | -1.403028 | -4.687693 | 5.356213 |
| C | -1.398331 | -2.466699 | 2.767035 | C | 2.165860  | -1.137543 | 1.992926 |

|   |          |           |          |
|---|----------|-----------|----------|
| C | 3.533164 | -0.534707 | 1.666289 |
| H | 1.990602 | -2.029723 | 1.374922 |
| H | 2.159666 | -1.462261 | 3.047668 |
| C | 4.681043 | -1.513549 | 1.947215 |
| H | 3.555277 | -0.231366 | 0.609481 |
| H | 3.674741 | 0.376739  | 2.266690 |

|   |          |           |          |
|---|----------|-----------|----------|
| C | 6.055704 | -0.911607 | 1.624592 |
| H | 4.647844 | -1.815566 | 3.004893 |
| H | 4.528832 | -2.428063 | 1.354278 |
| H | 6.864314 | -1.625619 | 1.830712 |
| H | 6.115021 | -0.625526 | 0.564996 |
| H | 6.235310 | -0.009647 | 2.226625 |

Free Energy: -521.800802 hartrees

Compound Styrene Epoxide  
Cartesian Coordinates

|   |          |          |          |
|---|----------|----------|----------|
| C | 2.381146 | 1.087867 | 1.656255 |
| H | 2.835502 | 1.067822 | 0.661970 |
| C | 0.920407 | 1.302629 | 1.730846 |
| H | 0.508258 | 1.756895 | 2.635719 |
| H | 0.348243 | 1.453129 | 0.811575 |
| C | 3.302127 | 1.494568 | 2.756720 |
| C | 4.523088 | 2.109015 | 2.438307 |
| C | 2.967049 | 1.292092 | 4.105896 |
| C | 5.392124 | 2.527704 | 3.452099 |

|   |          |           |          |
|---|----------|-----------|----------|
| H | 4.792532 | 2.255718  | 1.393122 |
| C | 3.836796 | 1.705971  | 5.117804 |
| H | 2.030461 | 0.797161  | 4.353783 |
| C | 5.050508 | 2.328365  | 4.794616 |
| H | 6.336324 | 3.003202  | 3.193485 |
| H | 3.569891 | 1.541941  | 6.160191 |
| H | 5.726944 | 2.649395  | 5.584323 |
| O | 1.472601 | -0.017775 | 1.908190 |

Free Energy: -384.599147 hartrees

Compound 25<sub>OMesext</sub>  
Cartesian Coordinates

|    |         |         |         |
|----|---------|---------|---------|
| Fe | 0.5940  | 0.6629  | -0.8623 |
| N  | -0.6659 | -0.9961 | -0.8984 |
| N  | -0.8466 | 1.6908  | 0.2492  |
| C  | 0.4516  | 3.7203  | 0.7227  |
| C  | 0.8901  | -2.6254 | -1.8769 |
| C  | -0.7287 | 2.9721  | 0.7214  |
| C  | -2.5377 | -2.3399 | -0.7528 |
| C  | -2.9032 | 2.3958  | 1.0200  |
| C  | -2.1506 | 1.3130  | 0.4068  |
| C  | -1.9802 | -1.0181 | -0.5126 |
| C  | -1.5279 | -3.1058 | -1.2851 |
| C  | -2.6669 | 0.0562  | 0.0649  |
| C  | -2.0198 | 3.4313  | 1.2166  |
| C  | -0.3575 | -2.2422 | -1.3753 |
| C  | 2.0391  | -1.8319 | -2.0098 |
| N  | 2.1183  | -0.5176 | -1.6527 |
| C  | 1.7052  | 3.3566  | 0.2034  |
| N  | 1.9763  | 2.1662  | -0.4194 |
| C  | 3.2747  | 2.1971  | -0.8379 |
| C  | 3.8856  | 3.4663  | -0.4395 |
| C  | 2.8923  | 4.1894  | 0.2083  |
| C  | 3.9213  | 1.1545  | -1.5167 |
| C  | 3.4093  | -0.1005 | -1.8746 |
| C  | 4.1881  | -1.1889 | -2.4277 |
| C  | 3.3383  | -2.2853 | -2.5027 |
| H  | -3.7110 | -0.1167 | 0.3110  |
| H  | 0.9715  | -3.6608 | -2.1943 |
| H  | 4.9676  | 1.3177  | -1.7544 |
| H  | 0.3814  | 4.7093  | 1.1664  |
| C  | 5.6251  | -1.1120 | -2.8356 |
| H  | 5.7928  | -1.6858 | -3.7566 |

|   |         |         |         |
|---|---------|---------|---------|
| H | 5.9409  | -0.0775 | -3.0100 |
| H | 6.2859  | -1.5392 | -2.0661 |
| C | 2.9870  | 5.5700  | 0.7761  |
| H | 1.9989  | 6.0280  | 0.8946  |
| H | 3.4747  | 5.5675  | 1.7627  |
| H | 3.5919  | 6.2125  | 0.1223  |
| C | -2.2910 | 4.7860  | 1.7934  |
| H | -1.5838 | 5.0252  | 2.5996  |
| H | -2.1881 | 5.5705  | 1.0296  |
| H | -3.3068 | 4.8432  | 2.2003  |
| C | -4.3764 | 2.3577  | 1.2870  |
| H | -4.6625 | 1.3908  | 1.7196  |
| H | -4.6541 | 3.1277  | 2.0150  |
| C | -5.1786 | 2.5752  | -0.0096 |
| H | -4.8637 | 1.8533  | -0.7764 |
| H | -4.9671 | 3.5714  | -0.4236 |
| C | -6.6831 | 2.4413  | 0.1757  |
| C | -3.9610 | -2.7214 | -0.4850 |
| H | -4.2797 | -2.3401 | 0.4935  |
| H | -4.0649 | -3.8111 | -0.4512 |
| C | -4.9036 | -2.1571 | -1.5644 |
| H | -4.7675 | -1.0708 | -1.6588 |
| H | -4.6535 | -2.5825 | -2.5472 |
| C | -6.3747 | -2.4328 | -1.2887 |
| C | 3.6053  | -3.6332 | -2.9741 |
| C | 4.8077  | -4.2228 | -3.1288 |
| C | 5.2596  | 3.8382  | -0.7292 |
| C | 5.9856  | 4.8108  | -0.1422 |
| H | 2.7240  | -4.2285 | -3.2176 |
| H | 5.7405  | -3.7258 | -2.8784 |
| H | 4.8721  | -5.2440 | -3.4996 |

|   |         |         |         |   |         |         |         |
|---|---------|---------|---------|---|---------|---------|---------|
| H | 5.7511  | 3.2518  | -1.5071 | H | 3.6958  | -0.3287 | 3.0295  |
| H | 5.5980  | 5.4249  | 0.6656  | H | 2.7671  | -1.8103 | 3.2951  |
| H | 7.0103  | 4.9950  | -0.4594 | C | 5.4729  | -2.4152 | 3.4513  |
| O | -7.2517 | -1.8714 | -2.1756 | H | 4.2917  | -3.0477 | 1.7454  |
| O | -6.8093 | -3.0931 | -0.3706 | H | 5.2170  | -1.5717 | 1.4673  |
| O | -7.4300 | 2.6086  | -0.9581 | H | 6.3530  | -3.0171 | 3.1881  |
| O | -7.2473 | 2.2011  | 1.2204  | H | 5.8233  | -1.4857 | 3.9218  |
| C | -1.5700 | -4.5429 | -1.7017 | H | 4.8899  | -2.9713 | 4.1989  |
| H | -2.5472 | -4.9873 | -1.4830 | C | 0.2381  | -1.9769 | 2.9068  |
| H | -1.3814 | -4.6513 | -2.7793 | C | 0.1293  | -3.1575 | 2.1540  |
| H | -0.8016 | -5.1293 | -1.1781 | C | 0.3595  | -2.0640 | 4.3008  |
| H | -6.7738 | -1.3682 | -2.8557 | C | 0.1651  | -4.4051 | 2.7836  |
| H | -6.8576 | 2.7962  | -1.7205 | H | 0.0209  | -3.0919 | 1.0737  |
| C | 0.9865  | 0.5277  | 2.5931  | C | 0.3884  | -3.3114 | 4.9339  |
| C | 0.1938  | -0.6657 | 2.1929  | H | 0.4441  | -1.1507 | 4.8865  |
| H | 0.5702  | 1.5223  | 2.4543  | C | 0.2971  | -4.4854 | 4.1761  |
| H | 1.6748  | 0.4166  | 3.4292  | H | 0.0883  | -5.3141 | 2.1894  |
| H | -0.7584 | -0.4731 | 1.7081  | H | 0.4848  | -3.3674 | 6.0167  |
| N | 1.3197  | -0.1928 | 1.3521  | H | 0.3248  | -5.4561 | 4.6675  |
| C | 2.5804  | -0.9721 | 1.2840  | O | 0.0421  | 1.4717  | -2.5029 |
| C | 3.3743  | -1.2703 | 2.5614  | C | -0.2826 | 2.8244  | -2.6950 |
| H | 3.2353  | -0.4058 | 0.6177  | H | -0.5321 | 3.0146  | -3.7539 |
| H | 2.3364  | -1.9119 | 0.7749  | H | -1.1494 | 3.1209  | -2.0751 |
| C | 4.6150  | -2.1076 | 2.2169  | H | 0.5596  | 3.4831  | -2.4121 |

Free Energy: -2594.874843 hartrees

Compound **25**<sub>OMequart</sub>  
**Cartesian Coordinates**

|    |         |         |         |   |         |         |         |
|----|---------|---------|---------|---|---------|---------|---------|
| Fe | 0.6052  | 0.6409  | -0.7994 | C | 3.2842  | -2.2287 | -2.5646 |
| N  | -0.6379 | -0.9538 | -0.8872 | H | -3.7071 | -0.0998 | 0.2874  |
| N  | -0.8147 | 1.6706  | 0.2186  | H | 0.9643  | -3.6353 | -2.2027 |
| C  | 0.4620  | 3.6966  | 0.7488  | H | 4.9279  | 1.3500  | -1.8261 |
| C  | 0.8849  | -2.6040 | -1.8755 | H | 0.3985  | 4.6741  | 1.2156  |
| C  | -0.7023 | 2.9433  | 0.7250  | C | 5.5404  | -1.0260 | -2.9801 |
| C  | -2.5205 | -2.3012 | -0.7636 | H | 5.6807  | -1.6213 | -3.8915 |
| C  | -2.8698 | 2.3747  | 1.0243  | H | 5.8193  | 0.0110  | -3.1971 |
| C  | -2.1258 | 1.3066  | 0.3867  | H | 6.2461  | -1.4134 | -2.2297 |
| C  | -1.9608 | -0.9866 | -0.5190 | C | 2.9749  | 5.5224  | 0.8149  |
| C  | -1.5101 | -3.0676 | -1.2859 | H | 1.9926  | 5.9992  | 0.9030  |
| C  | -2.6624 | 0.0699  | 0.0474  | H | 3.4246  | 5.4958  | 1.8189  |
| C  | -1.9818 | 3.3981  | 1.2391  | H | 3.6160  | 6.1601  | 0.1924  |
| C  | -0.3431 | -2.2069 | -1.3654 | C | -2.2365 | 4.7404  | 1.8511  |
| C  | 2.0075  | -1.7927 | -2.0135 | H | -1.5335 | 4.9460  | 2.6699  |
| N  | 2.0794  | -0.4829 | -1.6241 | H | -2.1158 | 5.5439  | 1.1103  |
| C  | 1.6924  | 3.3216  | 0.2129  | H | -3.2548 | 4.7998  | 2.2506  |
| N  | 1.9406  | 2.1338  | -0.4331 | C | -4.3409 | 2.3337  | 1.3021  |
| C  | 3.2387  | 2.1877  | -0.8629 | H | -4.6270 | 1.3594  | 1.7174  |
| C  | 3.8560  | 3.4439  | -0.4520 | H | -4.6080 | 3.0888  | 2.0493  |
| C  | 2.8757  | 4.1524  | 0.2226  | C | -5.1541 | 2.5830  | 0.0182  |
| C  | 3.8907  | 1.1771  | -1.5618 | H | -4.8490 | 1.8782  | -0.7682 |
| C  | 3.3618  | -0.0633 | -1.9023 | H | -4.9434 | 3.5879  | -0.3747 |
| C  | 4.1251  | -1.1298 | -2.5073 | C | -6.6571 | 2.4496  | 0.2161  |

|   |         |         |         |   |         |         |         |
|---|---------|---------|---------|---|---------|---------|---------|
| C | -3.9491 | -2.6751 | -0.5133 | H | -0.7534 | -0.4851 | 1.7368  |
| H | -4.2822 | -2.2858 | 0.4569  | N | 1.3300  | -0.2129 | 1.4043  |
| H | -4.0545 | -3.7643 | -0.4718 | C | 2.5808  | -1.0036 | 1.3234  |
| C | -4.8729 | -2.1191 | -1.6128 | C | 3.3863  | -1.2922 | 2.5950  |
| H | -4.7329 | -1.0341 | -1.7161 | H | 3.2297  | -0.4533 | 0.6361  |
| H | -4.6086 | -2.5545 | -2.5873 | H | 2.3196  | -1.9480 | 0.8304  |
| C | -6.3488 | -2.3879 | -1.3567 | C | 4.6198  | -2.1408 | 2.2540  |
| C | 3.5411  | -3.5653 | -3.0746 | H | 3.7146  | -0.3462 | 3.0497  |
| C | 4.7435  | -4.1477 | -3.2506 | H | 2.7796  | -1.8192 | 3.3390  |
| C | 5.2271  | 3.8208  | -0.7533 | C | 5.4837  | -2.4376 | 3.4869  |
| C | 5.9695  | 4.7508  | -0.1210 | H | 4.2882  | -3.0851 | 1.7966  |
| H | 2.6586  | -4.1527 | -3.3316 | H | 5.2202  | -1.6179 | 1.4940  |
| H | 5.6753  | -3.6551 | -2.9871 | H | 6.3589  | -3.0478 | 3.2260  |
| H | 4.8097  | -5.1569 | -3.6522 | H | 5.8422  | -1.5041 | 3.9433  |
| H | 5.6965  | 3.2831  | -1.5783 | H | 4.9023  | -2.9809 | 4.2451  |
| H | 5.6010  | 5.3097  | 0.7346  | C | 0.2285  | -2.0022 | 2.9339  |
| H | 6.9872  | 4.9546  | -0.4484 | C | 0.0960  | -3.1742 | 2.1711  |
| O | -7.2090 | -1.8473 | -2.2721 | C | 0.3674  | -2.1054 | 4.3252  |
| O | -6.7999 | -3.0255 | -0.4306 | C | 0.1244  | -4.4286 | 2.7875  |
| O | -7.4152 | 2.6430  | -0.9057 | H | -0.0260 | -3.0964 | 1.0930  |
| O | -7.2108 | 2.1891  | 1.2616  | C | 0.3898  | -3.3596 | 4.9453  |
| C | -1.5475 | -4.5043 | -1.7041 | H | 0.4694  | -1.1995 | 4.9194  |
| H | -2.5296 | -4.9447 | -1.5007 | C | 0.2738  | -4.5246 | 4.1771  |
| H | -1.3425 | -4.6125 | -2.7786 | H | 0.0285  | -5.3304 | 2.1851  |
| H | -0.7897 | -5.0930 | -1.1682 | H | 0.4993  | -3.4277 | 6.0262  |
| H | -6.7183 | -1.3616 | -2.9558 | H | 0.2957  | -5.5006 | 4.6584  |
| H | -6.8506 | 2.8451  | -1.6701 | O | 0.0409  | 1.4326  | -2.5061 |
| C | 0.9931  | 0.4990  | 2.6473  | C | -0.2415 | 2.7918  | -2.6804 |
| C | 0.1941  | -0.6851 | 2.2303  | H | -0.5150 | 3.0075  | -3.7314 |
| H | 0.5871  | 1.4994  | 2.5123  | H | -1.0820 | 3.1244  | -2.0379 |
| H | 1.6701  | 0.3752  | 3.4913  | H | 0.6263  | 3.4303  | -2.4190 |

Free Energy: -2594.860918 hartrees

Compound **25**<sub>OH<sub>ext</sub>(NMe<sub>4</sub>)<sub>2</sub></sub>

**Cartesian Coordinates**

|    |         |         |         |   |         |         |         |
|----|---------|---------|---------|---|---------|---------|---------|
| Fe | 2.1913  | 0.9090  | -1.2564 | C | 4.9786  | -0.4618 | -1.1990 |
| N  | 0.6707  | 2.1430  | -0.5462 | C | 5.6765  | -1.6916 | -1.5722 |
| N  | 0.7474  | -0.4226 | -1.9453 | C | 4.7049  | -2.5590 | -2.0531 |
| C  | 2.2063  | -2.3473 | -2.4098 | C | 5.5741  | 0.6797  | -0.6470 |
| C  | 2.0721  | 3.8317  | 0.5586  | C | 4.9419  | 1.8417  | -0.1837 |
| C  | 0.9663  | -1.7050 | -2.3830 | C | 5.6033  | 2.9555  | 0.4599  |
| C  | -1.3944 | 3.1252  | -0.2073 | C | 4.6059  | 3.8559  | 0.8192  |
| C  | -1.2772 | -1.3822 | -2.5114 | H | -2.3320 | 0.9509  | -1.5713 |
| C  | -0.6062 | -0.2060 | -1.9827 | H | 2.0290  | 4.7883  | 1.0709  |
| C  | -0.6692 | 2.0002  | -0.7855 | H | 6.6525  | 0.6503  | -0.5326 |
| C  | -0.4528 | 3.9382  | 0.3785  | H | 2.2023  | -3.3627 | -2.7955 |
| C  | -1.2504 | 0.9273  | -1.4710 | C | 7.0725  | 3.0703  | 0.7158  |
| C  | -0.2966 | -2.3185 | -2.7523 | H | 7.2555  | 3.5012  | 1.7091  |
| C  | 0.8409  | 3.3106  | 0.1491  | H | 7.5712  | 2.0965  | 0.6637  |
| C  | 3.3434  | 3.2662  | 0.3855  | H | 7.5572  | 3.7341  | -0.0159 |
| N  | 3.5834  | 2.0623  | -0.2189 | C | 4.8805  | -3.9741 | -2.5049 |
| C  | 3.4460  | -1.8449 | -1.9889 | H | 3.9357  | -4.5278 | -2.4718 |
| N  | 3.6441  | -0.5953 | -1.4598 | H | 5.2645  | -4.0273 | -3.5348 |

|   |         |         |         |   |         |         |         |
|---|---------|---------|---------|---|---------|---------|---------|
| H | 5.6081  | -4.4906 | -1.8646 | H | -7.9125 | 0.5463  | -4.0083 |
| C | -0.4694 | -3.7227 | -3.2425 | H | -7.3906 | -0.8825 | -3.0352 |
| H | 0.2338  | -3.9547 | -4.0540 | H | -8.9817 | -0.0940 | -2.7157 |
| H | -0.2869 | -4.4498 | -2.4371 | C | -6.6924 | -1.1263 | 2.3426  |
| H | -1.4886 | -3.8823 | -3.6122 | H | -6.6608 | -1.6528 | 1.3859  |
| C | -2.7581 | -1.5628 | -2.6278 | H | -7.5372 | -1.4584 | 2.9519  |
| H | -3.2423 | -0.6165 | -2.8980 | H | -6.7023 | -0.0425 | 2.2039  |
| H | -2.9901 | -2.2738 | -3.4294 | C | -5.4118 | -0.7647 | 4.4107  |
| C | -3.3614 | -2.0821 | -1.3071 | H | -6.2815 | -1.0939 | 4.9847  |
| H | -3.1473 | -1.3607 | -0.5061 | H | -4.4867 | -1.0259 | 4.9305  |
| H | -2.8579 | -3.0130 | -1.0116 | H | -5.4560 | 0.3082  | 4.2079  |
| C | -4.8918 | -2.3472 | -1.3199 | C | -4.2350 | -1.0155 | 2.2693  |
| C | -2.8830 | 3.2771  | -0.1866 | H | -3.3302 | -1.2735 | 2.8242  |
| H | -3.3199 | 2.9205  | -1.1276 | H | -4.2826 | -1.5478 | 1.3162  |
| H | -3.1537 | 4.3356  | -0.0965 | H | -4.3344 | 0.0653  | 2.1430  |
| C | -3.5075 | 2.4948  | 0.9861  | C | -5.3488 | -2.9629 | 3.2740  |
| H | -3.2354 | 1.4336  | 0.8939  | H | -5.3416 | -3.4167 | 2.2799  |
| H | -3.0685 | 2.8353  | 1.9343  | H | -4.4277 | -3.1935 | 3.8133  |
| C | -5.0534 | 2.5795  | 1.1104  | H | -6.2219 | -3.2813 | 3.8491  |
| C | 4.7160  | 5.1267  | 1.5144  | N | -5.4226 | -1.4720 | 3.0832  |
| C | 5.8199  | 5.8863  | 1.6626  | N | -7.2840 | 0.9686  | -2.0292 |
| C | 7.1018  | -1.9082 | -1.3962 | C | 3.0549  | -0.4889 | 1.7032  |
| C | 7.8615  | -2.8603 | -1.9743 | H | 3.9039  | -0.0857 | 1.1600  |
| H | 3.7916  | 5.5019  | 1.9558  | C | 2.0656  | 0.4976  | 2.2173  |
| H | 6.7791  | 5.6181  | 1.2293  | H | 1.4883  | 0.2172  | 3.0972  |
| H | 5.7690  | 6.8211  | 2.2176  | H | 2.2509  | 1.5624  | 2.0957  |
| H | 7.6038  | -1.2130 | -0.7218 | N | 1.7919  | -0.2378 | 0.9717  |
| H | 7.4617  | -3.5765 | -2.6864 | C | 0.7204  | -1.2617 | 0.9517  |
| H | 8.9246  | -2.9224 | -1.7498 | C | 0.1353  | -1.7937 | 2.2665  |
| O | -5.5547 | 1.9655  | 2.1027  | H | 1.1054  | -2.0993 | 0.3583  |
| O | -5.6957 | 3.2169  | 0.2279  | H | -0.1000 | -0.8167 | 0.3831  |
| O | -5.3819 | -2.7623 | -0.2241 | C | -0.9210 | -2.8688 | 1.9723  |
| O | -5.5345 | -2.1225 | -2.3844 | H | 0.9136  | -2.2221 | 2.9057  |
| C | -0.6750 | 5.2099  | 1.1373  | H | -0.3343 | -0.9728 | 2.8277  |
| H | -1.7138 | 5.5448  | 1.0390  | C | -1.4948 | -3.4845 | 3.2547  |
| H | -0.4642 | 5.0771  | 2.2089  | H | -1.7276 | -2.4333 | 1.3664  |
| H | -0.0177 | 6.0128  | 0.7757  | H | -0.4663 | -3.6606 | 1.3587  |
| O | 2.4673  | 1.7570  | -2.9642 | H | -2.2720 | -4.2269 | 3.0309  |
| H | 1.9253  | 1.3568  | -3.6607 | H | -0.7030 | -3.9811 | 3.8322  |
| C | -5.8489 | 1.2067  | -2.4361 | H | -1.9339 | -2.7100 | 3.9001  |
| H | -5.8541 | 1.6828  | -3.4202 | C | 3.3484  | -1.7991 | 2.3578  |
| H | -5.4034 | 1.8659  | -1.6870 | C | 3.6316  | -2.9092 | 1.5453  |
| H | -5.3568 | 0.2321  | -2.4788 | C | 3.3746  | -1.9483 | 3.7516  |
| C | -7.3076 | 0.3140  | -0.6694 | C | 3.9110  | -4.1535 | 2.1179  |
| H | -6.8274 | 0.9942  | 0.0373  | H | 3.6281  | -2.7924 | 0.4641  |
| H | -8.3533 | 0.1480  | -0.3964 | C | 3.6608  | -3.1911 | 4.3272  |
| H | -6.7740 | -0.6358 | -0.7466 | H | 3.1560  | -1.0895 | 4.3834  |
| C | -8.0107 | 2.2866  | -1.9611 | C | 3.9237  | -4.2985 | 3.5113  |
| H | -7.9683 | 2.7496  | -2.9503 | H | 4.1208  | -5.0090 | 1.4781  |
| H | -9.0473 | 2.0879  | -1.6772 | H | 3.6764  | -3.2960 | 5.4106  |
| H | -7.5049 | 2.9001  | -1.2114 | H | 4.1413  | -5.2668 | 3.9583  |
| C | -7.9462 | 0.0587  | -3.0308 |   |         |         |         |

Free Energy: -2982.780508 hartrees

Compound **25**<sub>OHquart(NMe<sub>4</sub>)<sub>2</sub></sub>

### Cartesian Coordinates

|    |         |         |         |   |          |         |         |
|----|---------|---------|---------|---|----------|---------|---------|
| Fe | 2.2271  | -0.3916 | -1.3082 | C | 6.2935   | 3.4682  | -1.2222 |
| N  | 1.3173  | 1.3991  | -1.4696 | C | 7.6040   | 3.7456  | -1.3702 |
| N  | 0.4161  | -1.2867 | -1.2271 | C | 5.9514   | -4.3595 | 0.0282  |
| C  | 1.1543  | -3.6242 | -1.1500 | C | 6.3557   | -5.6388 | -0.1006 |
| C  | 3.3104  | 2.8293  | -1.6140 | H | 5.6025   | 4.3120  | -1.2104 |
| C  | 0.1806  | -2.6409 | -1.2446 | H | 8.3623   | 2.9701  | -1.4311 |
| C  | -0.2790 | 3.0696  | -1.6752 | H | 7.9388   | 4.7776  | -1.4553 |
| C  | -1.8689 | -1.6820 | -1.2817 | H | 6.6517   | -3.6593 | 0.4856  |
| C  | -0.8151 | -0.6819 | -1.2710 | H | 5.7441   | -6.4010 | -0.5748 |
| C  | -0.0343 | 1.6530  | -1.4852 | H | 7.3377   | -5.9406 | 0.2583  |
| C  | 0.9540  | 3.6650  | -1.7989 | O | -3.6682  | 5.1355  | 1.1875  |
| C  | -1.0285 | 0.6886  | -1.3684 | O | -4.0107  | 5.1607  | -1.0451 |
| C  | -1.2441 | -2.9045 | -1.2805 | O | -5.7792  | -1.0566 | 1.6041  |
| C  | 1.9386  | 2.6139  | -1.6573 | O | -6.0970  | -1.1262 | -0.6272 |
| C  | 4.2706  | 1.8782  | -1.2788 | C | 1.2610   | 5.1196  | -1.9771 |
| N  | 4.0078  | 0.5572  | -1.0350 | H | 0.3547   | 5.6749  | -2.2432 |
| C  | 2.5120  | -3.4036 | -0.9286 | H | 1.6632   | 5.5575  | -1.0515 |
| N  | 3.1082  | -2.1631 | -0.8808 | H | 2.0097   | 5.2790  | -2.7647 |
| C  | 4.4234  | -2.3749 | -0.5522 | O | 2.4441   | -0.5927 | -3.2644 |
| C  | 4.6745  | -3.7981 | -0.3775 | H | 1.9545   | 0.1114  | -3.7156 |
| C  | 3.4694  | -4.4382 | -0.6253 | C | -8.9372  | -1.9946 | 1.5610  |
| C  | 5.3893  | -1.3813 | -0.4404 | H | -7.9211  | -1.5877 | 1.4833  |
| C  | 5.2033  | -0.0246 | -0.6881 | H | -9.6585  | -1.2220 | 1.8396  |
| C  | 6.2623  | 0.9589  | -0.6817 | H | -8.9698  | -2.8206 | 2.2763  |
| C  | 5.6882  | 2.1552  | -1.0802 | C | -10.7083 | -3.1507 | 0.2882  |
| H  | -2.0578 | 1.0321  | -1.3949 | H | -10.9712 | -3.5339 | -0.7007 |
| H  | 3.6459  | 3.8460  | -1.7890 | H | -10.6814 | -3.9617 | 1.0196  |
| H  | 6.3954  | -1.6962 | -0.1874 | H | -11.4133 | -2.3763 | 0.5994  |
| H  | 0.8116  | -4.6530 | -1.1771 | C | -9.3362  | -1.4110 | -0.7966 |
| C  | 7.6787  | 0.7084  | -0.2728 | H | -8.3170  | -1.0144 | -0.8341 |
| H  | 8.0713  | 1.5730  | 0.2784  | H | -9.6364  | -1.8215 | -1.7640 |
| H  | 7.7631  | -0.1773 | 0.3665  | H | -10.0553 | -0.6595 | -0.4614 |
| H  | 8.3328  | 0.5576  | -1.1447 | C | -8.3321  | -3.5799 | -0.2189 |
| C  | 3.1713  | -5.8999 | -0.5212 | H | -8.6496  | -3.9797 | -1.1852 |
| H  | 2.1015  | -6.0877 | -0.3848 | H | -7.3624  | -3.0828 | -0.3004 |
| H  | 3.4972  | -6.4439 | -1.4202 | H | -8.3189  | -4.3689 | 0.5369  |
| H  | 3.7091  | -6.3356 | 0.3312  | N | -9.3367  | -2.5372 | 0.2093  |
| C  | -1.8719 | -4.2636 | -1.2594 | C | -6.8770  | 4.0550  | 0.5883  |
| H  | -1.4093 | -4.9319 | -1.9982 | H | -7.3474  | 4.2465  | 1.5563  |
| H  | -1.7579 | -4.7392 | -0.2740 | H | -5.9806  | 4.6688  | 0.4559  |
| H  | -2.9439 | -4.1970 | -1.4770 | H | -7.5919  | 4.2159  | -0.2227 |
| C  | -3.3391 | -1.4096 | -1.2215 | C | -5.4728  | 2.3470  | 1.6714  |
| H  | -3.5866 | -0.4820 | -1.7520 | H | -5.9761  | 2.5749  | 2.6149  |
| H  | -3.8878 | -2.2133 | -1.7263 | H | -5.1969  | 1.2906  | 1.6389  |
| C  | -3.8355 | -1.3115 | 0.2351  | H | -4.6198  | 3.0149  | 1.5301  |
| H  | -3.3495 | -0.4636 | 0.7393  | C | -5.8130  | 2.3035  | -0.7753 |
| H  | -3.5259 | -2.2077 | 0.7914  | H | -5.5259  | 1.2504  | -0.7818 |
| C  | -5.3686 | -1.1575 | 0.4100  | H | -6.5562  | 2.4946  | -1.5541 |
| C  | -1.6162 | 3.7376  | -1.6261 | H | -4.9607  | 2.9739  | -0.9003 |
| H  | -2.3925 | 3.0887  | -2.0495 | C | -7.6583  | 1.7149  | 0.7373  |
| H  | -1.6038 | 4.6491  | -2.2352 | H | -8.3573  | 1.9193  | -0.0775 |
| C  | -1.9985 | 4.1097  | -0.1783 | H | -7.3124  | 0.6782  | 0.7132  |
| H  | -2.0517 | 3.1983  | 0.4351  | H | -8.1154  | 1.9525  | 1.7010  |
| H  | -1.2014 | 4.7234  | 0.2653  | N | -6.4582  | 2.6064  | 0.5560  |
| C  | -3.3418 | 4.8775  | -0.0102 | C | 2.3124   | 1.4024  | 1.6272  |



|   |        |         |        |   |        |         |        |
|---|--------|---------|--------|---|--------|---------|--------|
| H | 2.4852 | 2.0235  | 0.7540 | H | 5.8114 | 2.4668  | 5.5988 |
| N | 2.0047 | -0.0027 | 1.2248 | C | 2.4794 | -1.0970 | 2.0921 |
| C | 0.9433 | 0.8409  | 1.7926 | C | 1.4603 | -2.2353 | 2.1228 |
| H | 0.6094 | 0.5897  | 2.8004 | H | 2.6764 | -0.7501 | 3.1185 |
| H | 0.1571 | 1.1384  | 1.1013 | H | 3.4274 | -1.4486 | 1.6712 |
| C | 3.2355 | 1.7120  | 2.7592 | C | 2.0624 | -3.5488 | 2.6334 |
| C | 4.5813 | 1.9826  | 2.4537 | H | 0.6058 | -1.9446 | 2.7520 |
| C | 2.8328 | 1.7271  | 4.1036 | H | 1.0742 | -2.3906 | 1.1134 |
| C | 5.5046 | 2.2509  | 3.4672 | C | 1.0448 | -4.6967 | 2.5960 |
| H | 4.9021 | 1.9744  | 1.4148 | H | 2.9259 | -3.8052 | 2.0039 |
| C | 3.7559 | 1.9962  | 5.1211 | H | 2.4414 | -3.4150 | 3.6583 |
| H | 1.7936 | 1.5341  | 4.3583 | H | 1.4884 | -5.6412 | 2.9388 |
| C | 5.0946 | 2.2568  | 4.8071 | H | 0.1789 | -4.4729 | 3.2353 |
| H | 6.5429 | 2.4560  | 3.2120 | H | 0.6768 | -4.8430 | 1.5714 |
| H | 3.4272 | 2.0066  | 6.1588 |   |        |         |        |

Free Energy: -2982.768609 hartrees

Compound **26<sub>OMe</sub>**  
**Cartesian Coordinates**

|    |         |         |         |   |         |         |         |
|----|---------|---------|---------|---|---------|---------|---------|
| Fe | 1.2042  | 0.3289  | -0.6921 | C | -1.0933 | 5.2185  | 1.1197  |
| N  | -0.3163 | -1.0905 | -0.4799 | H | -0.4433 | 5.4443  | 1.9763  |
| N  | -0.1023 | 1.7282  | 0.1518  | H | -0.7624 | 5.8542  | 0.2857  |
| C  | 1.4804  | 3.5699  | 0.5146  | H | -2.1169 | 5.5095  | 1.3799  |
| C  | 0.9815  | -3.1312 | -0.8970 | C | -3.5332 | 3.1167  | 0.7325  |
| C  | 0.1962  | 3.0329  | 0.4693  | H | -4.0081 | 2.2890  | 1.2743  |
| C  | -2.4226 | -2.0470 | -0.4125 | H | -3.7230 | 4.0267  | 1.3115  |
| C  | -2.0604 | 2.8766  | 0.6034  | C | -4.2003 | 3.2480  | -0.6496 |
| C  | -1.4681 | 1.6076  | 0.2247  | H | -3.9560 | 2.3773  | -1.2739 |
| C  | -1.6492 | -0.8248 | -0.2985 | H | -3.8041 | 4.1254  | -1.1807 |
| C  | -1.5290 | -3.0580 | -0.6577 | C | -5.7156 | 3.3745  | -0.5802 |
| C  | -2.1791 | 0.4263  | 0.0121  | C | -3.9112 | -2.1188 | -0.2848 |
| C  | -1.0253 | 3.7685  | 0.7530  | H | -4.2434 | -1.5131 | 0.5665  |
| C  | -0.2118 | -2.4428 | -0.6928 | H | -4.2258 | -3.1471 | -0.0795 |
| C  | 2.2722  | -2.5925 | -0.9108 | C | -4.6133 | -1.6140 | -1.5584 |
| N  | 2.5635  | -1.2675 | -0.7301 | H | -4.2332 | -0.6203 | -1.8349 |
| C  | 2.6835  | 2.9031  | 0.2553  | H | -4.3857 | -2.2737 | -2.4081 |
| N  | 2.7810  | 1.5770  | -0.0989 | C | -6.1258 | -1.5202 | -1.4168 |
| C  | 4.1153  | 1.3014  | -0.2585 | C | 3.5518  | -4.7906 | -1.3051 |
| C  | 4.9054  | 2.4989  | 0.0099  | C | 4.6112  | -5.6084 | -1.1451 |
| C  | 3.9984  | 3.5007  | 0.3271  | C | 6.3546  | 2.5608  | -0.0837 |
| C  | 4.6373  | 0.0460  | -0.5772 | C | 7.1676  | 3.4874  | 0.4611  |
| C  | 3.9344  | -1.1461 | -0.7747 | H | 2.6164  | -5.2461 | -1.6333 |
| C  | 4.5439  | -2.4380 | -1.0055 | H | 5.5747  | -5.2563 | -0.7877 |
| C  | 3.5052  | -3.3556 | -1.0806 | H | 4.5178  | -6.6716 | -1.3575 |
| H  | -3.2555 | 0.4774  | 0.1469  | H | 6.8250  | 1.7602  | -0.6564 |
| H  | 0.8925  | -4.2041 | -1.0366 | H | 6.7974  | 4.3015  | 1.0777  |
| H  | 5.7181  | -0.0241 | -0.6388 | H | 8.2435  | 3.4285  | 0.3082  |
| H  | 1.5510  | 4.6179  | 0.7901  | O | -6.7884 | -1.0328 | -2.5097 |
| C  | 6.0100  | -2.6978 | -1.1495 | O | -6.7635 | -1.8325 | -0.4351 |
| H  | 6.1887  | -3.4548 | -1.9243 | O | -6.3551 | 3.4302  | -1.7878 |
| H  | 6.5581  | -1.7891 | -1.4213 | O | -6.3733 | 3.4258  | 0.4358  |
| H  | 6.4448  | -3.0846 | -0.2155 | C | -1.8010 | -4.5176 | -0.8365 |
| C  | 4.2876  | 4.9321  | 0.6514  | H | -2.8695 | -4.7324 | -0.7259 |
| H  | 3.4125  | 5.5695  | 0.4841  | H | -1.4837 | -4.8646 | -1.8303 |
| H  | 4.5950  | 5.0537  | 1.7010  | H | -1.2554 | -5.1107 | -0.0903 |
| H  | 5.1127  | 5.3049  | 0.0304  | H | -6.1627 | -0.8231 | -3.2227 |

|   |         |         |         |
|---|---------|---------|---------|
| H | -5.7149 | 3.3777  | -2.5167 |
| C | 1.1334  | -0.2480 | 3.6625  |
| C | 0.0087  | -0.4992 | 2.7352  |
| H | 1.3853  | 0.7798  | 3.9379  |
| H | 1.3978  | -1.0219 | 4.3879  |
| H | -0.5173 | 0.3724  | 2.3433  |
| C | -0.8006 | -1.7500 | 2.7803  |
| C | -2.1916 | -1.6549 | 2.9326  |
| C | -0.2067 | -3.0151 | 2.6724  |
| C | -2.9779 | -2.8084 | 2.9926  |
| H | -2.6581 | -0.6725 | 2.9869  |
| C | -0.9938 | -4.1684 | 2.7252  |

|   |         |         |         |
|---|---------|---------|---------|
| H | 0.8683  | -3.0836 | 2.5257  |
| C | -2.3809 | -4.0696 | 2.8867  |
| H | -4.0571 | -2.7225 | 3.1026  |
| H | -0.5255 | -5.1462 | 2.6272  |
| H | -2.9932 | -4.9688 | 2.9180  |
| O | 1.0721  | 0.8343  | -2.4894 |
| C | 1.0891  | 2.1705  | -2.9466 |
| H | 1.0044  | 2.1915  | -4.0459 |
| H | 0.2501  | 2.7471  | -2.5183 |
| H | 2.0259  | 2.6783  | -2.6567 |
| O | 1.3787  | -0.5971 | 2.2850  |

Free Energy: -2457.671314 hartrees

Compound **27<sub>OMe</sub>**  
**Cartesian Coordinates**

|    |         |         |         |
|----|---------|---------|---------|
| Fe | -0.9131 | 0.4308  | -0.5634 |
| N  | 0.7032  | 1.7361  | -0.4105 |
| N  | 0.4467  | -1.0882 | -0.9609 |
| C  | -1.1315 | -2.8154 | -1.7141 |
| C  | -0.4975 | 3.8798  | -0.3993 |
| C  | 0.1388  | -2.3745 | -1.3416 |
| C  | 2.8030  | 2.5277  | 0.1581  |
| C  | 2.3394  | -2.4085 | -0.8013 |
| C  | 1.7794  | -1.0806 | -0.6362 |
| C  | 2.0037  | 1.3614  | -0.1628 |
| C  | 1.9667  | 3.6169  | 0.0796  |
| C  | 2.4883  | 0.0536  | -0.2340 |
| C  | 1.3201  | -3.2151 | -1.2527 |
| C  | 0.6548  | 3.1040  | -0.2699 |
| C  | -1.7952 | 3.4224  | -0.6504 |
| N  | -2.1308 | 2.1050  | -0.8324 |
| C  | -2.3192 | -2.0750 | -1.7162 |
| N  | -2.4092 | -0.7367 | -1.3947 |
| C  | -3.7349 | -0.3926 | -1.4867 |
| C  | -4.5271 | -1.5612 | -1.8439 |
| C  | -3.6291 | -2.6100 | -2.0023 |
| C  | -4.2305 | 0.8980  | -1.2790 |
| C  | -3.4995 | 2.0596  | -1.0057 |
| C  | -4.0595 | 3.3899  | -0.9071 |
| C  | -2.9932 | 4.2527  | -0.6883 |
| H  | 3.5355  | -0.0906 | 0.0167  |
| H  | -0.3716 | 4.9470  | -0.2463 |
| H  | -5.3049 | 1.0198  | -1.3705 |
| H  | -1.2113 | -3.8611 | -1.9938 |
| C  | -5.5048 | 3.7435  | -1.0590 |
| H  | -5.6113 | 4.6846  | -1.6145 |
| H  | -6.0607 | 2.9632  | -1.5897 |
| H  | -5.9865 | 3.8914  | -0.0808 |
| C  | -3.9190 | -4.0248 | -2.3800 |
| H  | -3.0604 | -4.4911 | -2.8765 |
| H  | -4.1506 | -4.6084 | -1.4768 |
| H  | -4.7854 | -4.0767 | -3.0510 |
| C  | 1.3595  | -4.6773 | -1.5671 |
| H  | 0.6260  | -5.2280 | -0.9612 |
| H  | 1.1143  | -4.8651 | -2.6221 |
| H  | 2.3526  | -5.0951 | -1.3693 |
| C  | 3.7739  | -2.7601 | -0.5546 |

|   |         |         |         |
|---|---------|---------|---------|
| H | 4.1304  | -2.2737 | 0.3620  |
| H | 3.8825  | -3.8396 | -0.4054 |
| C | 4.6679  | -2.3172 | -1.7283 |
| H | 4.4993  | -1.2554 | -1.9545 |
| H | 4.4000  | -2.8700 | -2.6402 |
| C | 6.1532  | -2.5244 | -1.4682 |
| C | 4.2721  | 2.4996  | 0.4478  |
| H | 4.5220  | 1.6321  | 1.0706  |
| H | 4.5662  | 3.3915  | 1.0118  |
| C | 5.0958  | 2.4287  | -0.8517 |
| H | 4.7584  | 1.5845  | -1.4697 |
| H | 4.9345  | 3.3326  | -1.4559 |
| C | 6.5904  | 2.2659  | -0.6130 |
| C | -2.9871 | 5.6981  | -0.5396 |
| C | -4.0296 | 6.4887  | -0.2164 |
| C | -5.9729 | -1.5575 | -1.9954 |
| C | -6.7926 | -2.6207 | -1.8859 |
| H | -2.0235 | 6.1835  | -0.7013 |
| H | -5.0186 | 6.0945  | -0.0009 |
| H | -3.8965 | 7.5662  | -0.1424 |
| H | -6.4268 | -0.5870 | -2.2019 |
| H | -6.4251 | -3.6127 | -1.6375 |
| H | -7.8659 | -2.5045 | -2.0236 |
| O | 7.3627  | 2.2259  | -1.7408 |
| O | 7.1245  | 2.1612  | 0.4692  |
| O | 6.9906  | -2.0444 | -2.4369 |
| O | 6.6289  | -3.0776 | -0.5013 |
| C | 2.2940  | 5.0574  | 0.3200  |
| H | 3.3521  | 5.1814  | 0.5746  |
| H | 2.0834  | 5.6679  | -0.5693 |
| H | 1.6930  | 5.4660  | 1.1445  |
| H | 6.8130  | 2.3249  | -2.5360 |
| H | 6.4828  | -1.6270 | -3.1525 |
| C | -2.5698 | -0.5544 | 1.9728  |
| C | -1.5507 | -1.5968 | 1.6910  |
| H | -3.3985 | -0.4235 | 1.2805  |
| H | -2.7696 | -0.2864 | 3.0093  |
| N | -1.2405 | -0.1354 | 1.4641  |
| C | -0.3671 | 0.5668  | 2.4406  |
| C | -0.8353 | 2.0076  | 2.6323  |
| H | 0.6467  | 0.5394  | 2.0273  |
| H | -0.3596 | 0.0307  | 3.3985  |

|   |         |         |        |   |         |         |         |
|---|---------|---------|--------|---|---------|---------|---------|
| C | 0.2516  | 2.8896  | 3.2572 | H | 0.8324  | -2.7602 | 1.3897  |
| H | -1.1147 | 2.4253  | 1.6611 | C | -0.5916 | -3.2927 | 4.9642  |
| H | -1.7383 | 2.0192  | 3.2591 | H | -2.2922 | -2.1452 | 4.2848  |
| C | -0.2150 | 4.3426  | 3.4145 | C | 0.6557  | -3.8284 | 4.6237  |
| H | 0.5473  | 2.4815  | 4.2354 | H | 2.1382  | -4.0500 | 3.0632  |
| H | 1.1415  | 2.8566  | 2.6132 | H | -0.9979 | -3.4472 | 5.9618  |
| H | 0.5777  | 4.9749  | 3.8357 | H | 1.2231  | -4.3978 | 5.3574  |
| H | -0.5038 | 4.7573  | 2.4392 | H | -1.6622 | -2.1274 | 0.7509  |
| H | -1.0896 | 4.4028  | 4.0774 | O | -3.5807 | -4.2545 | 1.0486  |
| C | -0.8104 | -2.3602 | 2.7330 | C | -2.4282 | -4.9417 | 0.7788  |
| C | 0.4381  | -2.9073 | 2.3928 | H | -1.5185 | -4.5028 | 1.2519  |
| C | -1.3211 | -2.5583 | 4.0218 | H | -2.4764 | -5.9860 | 1.1812  |
| C | 1.1700  | -3.6333 | 3.3347 | H | -2.2093 | -5.0567 | -0.3097 |

Free Energy: -2594.836212 hartrees

Transition State **TS<sub>27-280Me</sub>**

Imaginary Frequency at -356 cm<sup>-1</sup>

**Cartesian Coordinates**

|    |         |         |         |   |         |         |         |
|----|---------|---------|---------|---|---------|---------|---------|
| Fe | -0.9878 | 0.2720  | -0.5778 | H | 2.7728  | -4.9538 | -1.3375 |
| N  | 0.5118  | 1.7186  | -0.5156 | C | 3.9845  | -2.4744 | -0.6002 |
| N  | 0.5110  | -1.1284 | -0.9929 | H | 4.2961  | -1.9574 | 0.3162  |
| C  | -0.9145 | -3.0183 | -1.6471 | H | 4.1977  | -3.5385 | -0.4532 |
| C  | -0.8851 | 3.7434  | -0.5076 | C | 4.8279  | -1.9468 | -1.7758 |
| C  | 0.3178  | -2.4469 | -1.3317 | H | 4.5637  | -0.9035 | -1.9969 |
| C  | 2.5235  | 2.7040  | 0.0678  | H | 4.6072  | -2.5173 | -2.6895 |
| C  | 2.5212  | -2.2643 | -0.8374 | C | 6.3271  | -2.0158 | -1.5212 |
| C  | 1.8404  | -0.9903 | -0.6915 | C | 3.9895  | 2.8116  | 0.3548  |
| C  | 1.8404  | 1.4683  | -0.2593 | H | 4.3142  | 1.9850  | 0.9986  |
| C  | 1.5864  | 3.7086  | -0.0065 | H | 4.2059  | 3.7398  | 0.8947  |
| C  | 2.4450  | 0.2112  | -0.3174 | C | 4.8139  | 2.7783  | -0.9459 |
| C  | 1.5751  | -3.1732 | -1.2475 | H | 4.5391  | 1.9003  | -1.5473 |
| C  | 0.3312  | 3.0754  | -0.3665 | H | 4.5836  | 3.6563  | -1.5660 |
| C  | -2.1333 | 3.1701  | -0.7665 | C | 6.3170  | 2.7360  | -0.7100 |
| N  | -2.3484 | 1.8259  | -0.9219 | C | -3.5236 | 5.3323  | -0.7023 |
| C  | -2.1653 | -2.3887 | -1.6487 | C | -4.6318 | 6.0322  | -0.3886 |
| N  | -2.3698 | -1.0518 | -1.3754 | C | -5.8511 | -2.1969 | -1.9264 |
| C  | -3.7221 | -0.8272 | -1.4677 | C | -6.5812 | -3.3252 | -1.8303 |
| C  | -4.4112 | -2.0729 | -1.7748 | H | -2.6075 | 5.8980  | -0.8784 |
| C  | -3.4247 | -3.0450 | -1.9001 | H | -5.5802 | 5.5542  | -0.1602 |
| C  | -4.3303 | 0.4216  | -1.3091 | H | -4.5964 | 7.1186  | -0.3359 |
| C  | -3.7063 | 1.6528  | -1.0859 | H | -6.3880 | -1.2685 | -2.1261 |
| C  | -4.3847 | 2.9305  | -1.0206 | H | -6.1393 | -4.2890 | -1.5936 |
| C  | -3.4015 | 3.8895  | -0.8221 | H | -7.6601 | -3.2924 | -1.9689 |
| H  | 3.5019  | 0.1689  | -0.0696 | O | 7.0865  | 2.6964  | -1.8397 |
| H  | -0.8574 | 4.8180  | -0.3565 | O | 6.8609  | 2.7292  | 0.3723  |
| H  | -5.4115 | 0.4444  | -1.3961 | O | 7.1136  | -1.4854 | -2.5060 |
| H  | -0.9035 | -4.0785 | -1.8779 | O | 6.8544  | -2.4908 | -0.5396 |
| C  | -5.8564 | 3.1466  | -1.1778 | C | 1.7736  | 5.1733  | 0.2377  |
| H  | -6.0492 | 4.0675  | -1.7435 | H | 2.8080  | 5.3938  | 0.5224  |
| H  | -6.3357 | 2.3118  | -1.7006 | H | 1.5346  | 5.7603  | -0.6603 |
| H  | -6.3518 | 3.2590  | -0.2017 | H | 1.1134  | 5.5271  | 1.0418  |
| C  | -3.5962 | -4.4916 | -2.2346 | H | 6.5290  | 2.7109  | -2.6354 |
| H  | -2.6824 | -4.9182 | -2.6624 | H | 6.5671  | -1.1382 | -3.2303 |
| H  | -3.8502 | -5.0761 | -1.3379 | C | -2.3820 | -0.8697 | 1.9697  |
| H  | -4.4143 | -4.6259 | -2.9537 | C | -1.2901 | -1.8408 | 1.7897  |
| C  | 1.7415  | -4.6343 | -1.5226 | H | -3.2356 | -0.9590 | 1.2974  |
| H  | 1.0758  | -5.2313 | -0.8827 | H | -2.6664 | -0.6006 | 2.9891  |
| H  | 1.4912  | -4.8756 | -2.5653 | N | -1.2531 | -0.0913 | 1.4244  |

|   |         |         |        |
|---|---------|---------|--------|
| C | -0.5458 | 0.7739  | 2.3847 |
| C | -1.3190 | 2.0797  | 2.6095 |
| H | 0.4412  | 0.9905  | 1.9634 |
| H | -0.3954 | 0.2533  | 3.3398 |
| C | -0.4391 | 3.1630  | 3.2449 |
| H | -1.6863 | 2.4445  | 1.6455 |
| H | -2.1988 | 1.8863  | 3.2399 |
| C | -1.1850 | 4.4967  | 3.3823 |
| H | -0.0829 | 2.8257  | 4.2298 |
| H | 0.4509  | 3.3020  | 2.6142 |
| H | -0.5424 | 5.2724  | 3.8199 |
| H | -1.5238 | 4.8470  | 2.3975 |
| H | -2.0712 | 4.3851  | 4.0227 |
| C | -0.3479 | -2.2876 | 2.8122 |
| C | 0.8537  | -2.8917 | 2.3932 |

|   |         |         |        |
|---|---------|---------|--------|
| C | -0.5876 | -2.1333 | 4.1902 |
| C | 1.7999  | -3.3151 | 3.3284 |
| H | 1.0468  | -3.0079 | 1.3299 |
| C | 0.3569  | -2.5625 | 5.1251 |
| H | -1.5201 | -1.6887 | 4.5289 |
| C | 1.5550  | -3.1513 | 4.6976 |
| H | 2.7275  | -3.7728 | 2.9895 |
| H | 0.1582  | -2.4414 | 6.1881 |
| H | 2.2907  | -3.4820 | 5.4281 |
| H | -1.2160 | -2.3097 | 0.8204 |
| O | -2.6491 | -4.0542 | 1.8565 |
| C | -1.7461 | -4.9607 | 1.3608 |
| H | -0.7647 | -4.9536 | 1.8941 |
| H | -2.1284 | -6.0069 | 1.4587 |
| H | -1.5218 | -4.8282 | 0.2743 |

Free Energy: -2594.826728 hartrees

Compound **28<sub>OMe</sub>**  
**Cartesian Coordinates**

|    |         |         |         |
|----|---------|---------|---------|
| Fe | 0.9674  | 0.1923  | -0.6339 |
| N  | -0.3599 | -1.4171 | -0.8759 |
| N  | -0.6838 | 1.4786  | -0.7872 |
| C  | 0.5160  | 3.6182  | -0.8678 |
| C  | 1.2862  | -3.2216 | -1.0975 |
| C  | -0.6384 | 2.8508  | -0.7172 |
| C  | -2.2523 | -2.7156 | -0.5683 |
| C  | -2.8058 | 2.2967  | -0.3574 |
| C  | -1.9899 | 1.1158  | -0.5714 |
| C  | -1.7139 | -1.3693 | -0.6628 |
| C  | -1.1938 | -3.5762 | -0.7302 |
| C  | -2.4607 | -0.1985 | -0.5225 |
| C  | -1.9659 | 3.3809  | -0.4510 |
| C  | -0.0128 | -2.7445 | -0.9175 |
| C  | 2.4425  | -2.4587 | -1.3001 |
| N  | 2.4701  | -1.0913 | -1.3488 |
| C  | 1.8123  | 3.1524  | -1.1228 |
| N  | 2.1532  | 1.8251  | -1.2313 |
| C  | 3.5019  | 1.7746  | -1.4708 |
| C  | 4.0494  | 3.1289  | -1.5204 |
| C  | 2.9812  | 3.9876  | -1.3040 |
| C  | 4.2434  | 0.5980  | -1.6072 |
| C  | 3.7837  | -0.7214 | -1.5403 |
| C  | 4.6268  | -1.8948 | -1.6189 |
| C  | 3.7924  | -2.9909 | -1.4551 |
| H  | -3.5208 | -0.3235 | -0.3205 |
| H  | 1.4054  | -4.3006 | -1.0722 |
| H  | 5.3113  | 0.7179  | -1.7584 |
| H  | 0.3910  | 4.6934  | -0.7782 |
| C  | 6.1051  | -1.8924 | -1.8477 |
| H  | 6.3989  | -2.7532 | -2.4620 |
| H  | 6.4344  | -0.9768 | -2.3516 |
| H  | 6.6589  | -1.9688 | -0.8997 |
| C  | 2.9927  | 5.4833  | -1.2884 |
| H  | 1.9944  | 5.8970  | -1.4681 |
| H  | 3.3480  | 5.8726  | -0.3224 |

|   |         |         |         |
|---|---------|---------|---------|
| H | 3.6735  | 5.8693  | -2.0588 |
| C | -2.3027 | 4.8328  | -0.3130 |
| H | -1.6611 | 5.3192  | 0.4345  |
| H | -2.1568 | 5.3672  | -1.2629 |
| H | -3.3463 | 4.9661  | -0.0075 |
| C | -4.2852 | 2.2720  | -0.1256 |
| H | -4.5430 | 1.4832  | 0.5924  |
| H | -4.6195 | 3.2195  | 0.3101  |
| C | -5.0536 | 2.0171  | -1.4359 |
| H | -4.6599 | 1.1242  | -1.9405 |
| H | -4.9019 | 2.8534  | -2.1337 |
| C | -6.5509 | 1.8338  | -1.2342 |
| C | -3.7030 | -3.0338 | -0.3744 |
| H | -4.1281 | -2.3980 | 0.4129  |
| H | -3.8256 | -4.0713 | -0.0456 |
| C | -4.5053 | -2.8152 | -1.6708 |
| H | -4.3209 | -1.8068 | -2.0664 |
| H | -4.1681 | -3.5147 | -2.4493 |
| C | -6.0065 | -2.9899 | -1.4914 |
| C | 4.1185  | -4.4066 | -1.4380 |
| C | 5.3220  | -4.9589 | -1.1885 |
| C | 5.4451  | 3.4382  | -1.7814 |
| C | 6.0876  | 4.5937  | -1.5186 |
| H | 3.2873  | -5.0853 | -1.6354 |
| H | 6.1971  | -4.3646 | -0.9413 |
| H | 5.4438  | -6.0402 | -1.2080 |
| H | 6.0290  | 2.6356  | -2.2345 |
| H | 5.6016  | 5.4372  | -1.0365 |
| H | 7.1402  | 4.7041  | -1.7720 |
| O | -6.7644 | -2.7248 | -2.5988 |
| O | -6.5596 | -3.3347 | -0.4702 |
| O | -7.2552 | 1.4833  | -2.3531 |
| O | -7.1435 | 1.9731  | -0.1868 |
| C | -1.2017 | -5.0732 | -0.7301 |
| H | -2.1946 | -5.4604 | -0.4759 |
| H | -0.9246 | -5.4724 | -1.7165 |

|   |         |         |         |
|---|---------|---------|---------|
| H | -0.4803 | -5.4745 | -0.0047 |
| H | -6.2004 | -2.4583 | -3.3437 |
| H | -6.6625 | 1.3996  | -3.1185 |
| C | 1.2545  | 1.3385  | 2.0930  |
| C | -0.1865 | 1.6009  | 2.6064  |
| H | 1.5481  | 2.2197  | 1.5055  |
| H | 1.9253  | 1.2628  | 2.9644  |
| N | 1.3271  | 0.1549  | 1.2623  |
| C | 1.7628  | -1.0745 | 1.9095  |
| C | 3.2974  | -1.1941 | 1.9914  |
| H | 1.3813  | -1.9228 | 1.3259  |
| H | 1.3332  | -1.1521 | 2.9209  |
| C | 3.7453  | -2.5867 | 2.4501  |
| H | 3.7136  | -0.9909 | 0.9984  |
| H | 3.6920  | -0.4264 | 2.6737  |
| C | 5.2719  | -2.7414 | 2.4236  |
| H | 3.3645  | -2.7851 | 3.4636  |
| H | 3.2903  | -3.3374 | 1.7869  |
| H | 5.5815  | -3.7460 | 2.7422  |

|   |         |         |        |
|---|---------|---------|--------|
| H | 5.6531  | -2.5732 | 1.4071 |
| H | 5.7506  | -2.0089 | 3.0889 |
| C | -0.6708 | 0.4740  | 3.4980 |
| C | -1.4704 | -0.5420 | 2.9605 |
| C | -0.2483 | 0.3788  | 4.8317 |
| C | -1.8306 | -1.6502 | 3.7346 |
| H | -1.7912 | -0.4707 | 1.9245 |
| C | -0.6170 | -0.7202 | 5.6136 |
| H | 0.3688  | 1.1716  | 5.2502 |
| C | -1.4030 | -1.7429 | 5.0644 |
| H | -2.4441 | -2.4380 | 3.3003 |
| H | -0.2860 | -0.7852 | 6.6488 |
| H | -1.6830 | -2.6020 | 5.6713 |
| H | -0.8446 | 1.6646  | 1.7294 |
| O | -0.1552 | 2.8757  | 3.2680 |
| C | -1.4714 | 3.3835  | 3.5109 |
| H | -2.0310 | 2.7314  | 4.2008 |
| H | -1.3537 | 4.3752  | 3.9613 |
| H | -2.0340 | 3.4689  | 2.5660 |

Free Energy: -2594.890174 hartrees

#### Compound CO<sub>2</sub>

##### Cartesian Coordinates

|   |          |          |           |
|---|----------|----------|-----------|
| C | 0.000000 | 0.000000 | 0.000000  |
| O | 0.000000 | 0.000000 | 1.168139  |
| O | 0.000000 | 0.000000 | -1.168139 |

Free Energy: -188.561534 hartrees

#### Compound 14

##### Cartesian Coordinates

|   |           |          |           |   |           |          |           |
|---|-----------|----------|-----------|---|-----------|----------|-----------|
| C | -0.144510 | 3.390337 | -1.095617 | C | 0.210966  | 1.760907 | -2.723831 |
| C | 1.372072  | 3.137716 | -1.255932 | C | -2.140915 | 2.123343 | -2.052729 |
| H | -0.451336 | 3.362261 | -0.044428 | C | -2.735761 | 3.195493 | -2.976791 |
| H | -0.443405 | 4.353416 | -1.533226 | H | -2.624476 | 2.157278 | -1.067849 |
| H | 1.743863  | 2.537160 | -0.417428 | H | -2.306349 | 1.127363 | -2.478203 |
| N | -0.701875 | 2.272229 | -1.846691 | C | -4.245354 | 3.004956 | -3.170852 |
| C | 2.213009  | 4.373539 | -1.425422 | H | -2.544948 | 4.193350 | -2.556830 |
| C | 3.245360  | 4.648336 | -0.519227 | H | -2.226013 | 3.147382 | -3.949576 |
| C | 1.968845  | 5.265064 | -2.482679 | C | -4.853415 | 4.069786 | -4.093959 |
| C | 4.021812  | 5.805017 | -0.658367 | H | -4.431387 | 2.003205 | -3.586116 |
| H | 3.439504  | 3.953703 | 0.296668  | H | -4.742097 | 3.037107 | -2.189510 |
| C | 2.749580  | 6.413605 | -2.629748 | H | -5.933203 | 3.917204 | -4.222202 |
| H | 1.174189  | 5.052260 | -3.195247 | H | -4.697259 | 5.076237 | -3.680969 |
| C | 3.775778  | 6.688159 | -1.714788 | H | -4.383357 | 4.036302 | -5.086734 |
| H | 4.819148  | 6.011411 | 0.052750  | O | 0.030086  | 0.952878 | -3.620184 |
| H | 2.557853  | 7.097060 | -3.454526 | O | 1.456084  | 2.287060 | -2.454869 |
| H | 4.381010  | 7.585375 | -1.828387 |   |           |          |           |

Free Energy: -710.369852 hartrees

#### Compound 29<sub>OMe</sub>

### Cartesian Coordinates

|    |         |         |         |   |         |         |         |
|----|---------|---------|---------|---|---------|---------|---------|
| Fe | -0.1042 | 1.1465  | 0.4259  | C | 4.4407  | 1.8401  | 3.7017  |
| N  | -1.9317 | 1.6907  | -0.4429 | C | 5.5200  | 1.2112  | 4.2046  |
| N  | -1.0815 | -0.5202 | 1.2079  | H | -0.5899 | 6.5706  | -1.7112 |
| C  | 0.6572  | -1.2958 | 2.7577  | H | 2.3873  | 7.3422  | -1.6211 |
| C  | -1.3301 | 3.9430  | -1.2136 | H | 0.9705  | 8.2498  | -2.4053 |
| C  | -0.5247 | -1.4640 | 2.0445  | H | 4.4741  | 2.9282  | 3.6313  |
| C  | -3.9983 | 1.5294  | -1.4759 | H | 5.5838  | 0.1286  | 4.2687  |
| C  | -2.4451 | -2.3904 | 1.2821  | H | 6.3798  | 1.7829  | 4.5480  |
| C  | -2.2560 | -1.0601 | 0.7397  | O | -8.5330 | 0.4501  | 0.1643  |
| C  | -3.0145 | 0.8690  | -0.6389 | O | -7.9107 | -0.3348 | -1.8213 |
| C  | -3.4872 | 2.7659  | -1.7881 | O | -7.2832 | -3.0757 | 2.0356  |
| C  | -3.1477 | -0.4142 | -0.1132 | O | -6.1680 | -4.6077 | 0.8725  |
| C  | -1.3666 | -2.6446 | 2.0965  | C | -4.1154 | 3.8519  | -2.6044 |
| C  | -2.1885 | 2.8491  | -1.1403 | H | -5.0324 | 3.4965  | -3.0871 |
| C  | -0.1021 | 4.0901  | -0.5627 | H | -4.3754 | 4.7182  | -1.9790 |
| N  | 0.4612  | 3.1476  | 0.2630  | H | -3.4311 | 4.2095  | -3.3858 |
| C  | 1.4824  | -0.1686 | 2.7567  | H | -8.1845 | 1.0193  | 0.8704  |
| N  | 1.2671  | 0.9613  | 1.9973  | H | -7.1114 | -2.2482 | 2.5147  |
| C  | 2.3138  | 1.8144  | 2.2521  | C | 1.8992  | -3.1414 | -1.2979 |
| C  | 3.2259  | 1.2091  | 3.2132  | C | 2.3617  | -3.3108 | -2.7638 |
| C  | 2.6914  | -0.0301 | 3.5319  | H | 0.8994  | -3.5764 | -1.2081 |
| C  | 2.4907  | 3.0594  | 1.6505  | H | 2.5746  | -3.7012 | -0.6480 |
| C  | 1.6412  | 3.6866  | 0.7363  | N | 1.8470  | -1.7483 | -0.8527 |
| C  | 1.8490  | 5.0028  | 0.1808  | C | 3.0579  | -1.1000 | -0.2933 |
| C  | 0.7591  | 5.2617  | -0.6416 | C | 3.9021  | -1.9810 | 0.6281  |
| H  | -4.0379 | -0.9677 | -0.3966 | H | 2.7235  | -0.2277 | 0.2699  |
| H  | -1.6642 | 4.7706  | -1.8315 | H | 3.6936  | -0.7440 | -1.1157 |
| H  | 3.3856  | 3.6059  | 1.9282  | C | 5.1182  | -1.1974 | 1.1396  |
| H  | 0.9657  | -2.1272 | 3.3843  | H | 3.2935  | -2.3364 | 1.4713  |
| C  | 3.0034  | 5.9051  | 0.4805  | H | 4.2723  | -2.8615 | 0.0900  |
| H  | 2.6641  | 6.9467  | 0.5520  | C | 6.0868  | -2.0778 | 1.9394  |
| H  | 3.4979  | 5.6361  | 1.4199  | H | 5.6480  | -0.7701 | 0.2753  |
| H  | 3.7586  | 5.8667  | -0.3188 | H | 4.7797  | -0.3541 | 1.7535  |
| C  | 3.2152  | -1.0385 | 4.5025  | H | 6.9351  | -1.4939 | 2.3203  |
| H  | 2.4076  | -1.6529 | 4.9162  | H | 5.5830  | -2.5418 | 2.7990  |
| H  | 3.9371  | -1.7168 | 4.0261  | H | 6.4827  | -2.8882 | 1.3115  |
| H  | 3.7363  | -0.5401 | 5.3289  | C | 3.6892  | -2.6246 | -3.0246 |
| C  | -1.0785 | -3.8714 | 2.9036  | C | 3.7240  | -1.4083 | -3.7178 |
| H  | -0.0826 | -4.2728 | 2.6711  | C | 4.8809  | -3.1513 | -2.5068 |
| H  | -1.0971 | -3.6518 | 3.9807  | C | 4.9273  | -0.7097 | -3.8699 |
| H  | -1.8190 | -4.6536 | 2.7050  | H | 2.7992  | -1.0015 | -4.1244 |
| C  | -3.6394 | -3.2531 | 1.0128  | C | 6.0855  | -2.4607 | -2.6600 |
| H  | -3.8951 | -3.2244 | -0.0538 | H | 4.8553  | -4.1026 | -1.9793 |
| H  | -3.4192 | -4.2966 | 1.2602  | C | 6.1101  | -1.2323 | -3.3345 |
| C  | -4.8627 | -2.7895 | 1.8279  | H | 4.9410  | 0.2395  | -4.4023 |
| H  | -5.0598 | -1.7240 | 1.6504  | H | 7.0043  | -2.8734 | -2.2470 |
| H  | -4.6596 | -2.8883 | 2.9043  | H | 7.0473  | -0.6907 | -3.4474 |
| C  | -6.1241 | -3.5835 | 1.5180  | H | 1.5963  | -2.8597 | -3.4146 |
| C  | -5.3348 | 0.9496  | -1.8235 | O | 2.4042  | -4.7284 | -2.9825 |
| H  | -5.2363 | -0.1128 | -2.0776 | C | 2.5628  | -5.0636 | -4.3648 |
| H  | -5.7510 | 1.4506  | -2.7042 | H | 3.5231  | -4.6945 | -4.7587 |
| C  | -6.3196 | 1.0883  | -0.6469 | H | 2.5365  | -6.1565 | -4.4318 |
| H  | -5.8605 | 0.7126  | 0.2785  | H | 1.7431  | -4.6367 | -4.9676 |
| H  | -6.5480 | 2.1477  | -0.4642 | C | 0.7918  | -0.9906 | -1.3206 |
| C  | -7.6280 | 0.3386  | -0.8550 | O | -0.1321 | -1.4769 | -1.9854 |
| C  | 0.4547  | 6.4494  | -1.4222 | O | 0.8408  | 0.3096  | -1.0058 |
| C  | 1.3224  | 7.3969  | -1.8283 |   |         |         |         |

Free energy: 2783.436513 hartrees

Compound **27<sub>OH</sub>(NMe<sub>4</sub>)<sub>2</sub>**  
**Cartesian Coordinates**

Fe 2.0278 0.6441 -0.9393  
N 0.5800 2.1041 -0.7431  
C 1.9870 3.8841 0.2032  
C 0.8667 -1.7878 -2.4477  
C -1.4831 3.1207 -0.4585  
C -1.3812 -1.4980 -2.5010  
C -0.7119 -0.3111 -2.0017  
C -0.7718 1.9531 -0.9456  
C -0.5302 3.9788 0.0455  
C -1.3623 0.8326 -1.5334  
C -0.3956 -2.4195 -2.7741  
C 0.7537 3.3335 -0.1460  
C 3.2515 3.3153 0.0199  
N 3.4766 2.0725 -0.5219  
C 3.3529 -1.8606 -2.1956  
N 3.5328 -0.5893 -1.6935  
C 4.8818 -0.4330 -1.4835  
C 5.5890 -1.6499 -1.8614  
C 4.6203 -2.5446 -2.2986  
C 5.4804 0.7252 -0.9858  
C 4.8446 1.8893 -0.5468  
C 5.5156 3.0491 -0.0084  
C 4.5198 3.9517 0.3470  
H -2.4453 0.8418 -1.6152  
H 1.9541 4.8735 0.6493  
H 6.5623 0.7179 -0.9134  
H 2.1126 -3.4233 -2.9198  
C 6.9924 3.1996 0.1648  
H 7.2107 3.7359 1.0968  
H 7.4934 2.2270 0.2034  
H 7.4372 3.7798 -0.6578  
C 4.8122 -3.9613 -2.7376  
H 3.8875 -4.5412 -2.6447  
H 5.1409 -4.0191 -3.7859  
H 5.5886 -4.4443 -2.1301  
C -0.5596 -3.8235 -3.2673  
H 0.0938 -4.0254 -4.1271  
H -0.3000 -4.5512 -2.4844  
H -1.5960 -4.0106 -3.5692  
C -2.8625 -1.6950 -2.5668  
H -3.3630 -0.7634 -2.8573  
H -3.1124 -2.4373 -3.3335  
C -3.4204 -2.1664 -1.2080  
H -3.1793 -1.4185 -0.4398  
H -2.9089 -3.0884 -0.8979  
C -4.9516 -2.4274 -1.1625  
C -2.9702 3.2786 -0.4335  
H -3.4188 2.8465 -1.3362  
H -3.2383 4.3413 -0.4267  
C -3.5777 2.5941 0.8075  
H -3.2889 1.5335 0.8084  
H -3.1416 3.0243 1.7199  
C -5.1248 2.6667 0.9296  
C 4.6408 5.2648 0.9578

N 0.6526 -0.5045 -1.9893  
C 2.1117 -2.4054 -2.5418  
  
C 5.7285 6.0598 0.9635  
C 7.0232 -1.8383 -1.7255  
C 7.7810 -2.7655 -2.3434  
H 3.7448 5.6382 1.4554  
H 6.6534 5.7890 0.4623  
H 5.6983 7.0243 1.4664  
H 7.5282 -1.1473 -1.0494  
H 7.3718 -3.4728 -3.0591  
H 8.8508 -2.8149 -2.1501  
O -5.6146 2.1188 1.9650  
O -5.7766 3.2317 0.0062  
O -5.4091 -2.7851 -0.0335  
O -5.6235 -2.2558 -2.2187  
C -0.7420 5.3103 0.6960  
H -1.7810 5.6380 0.5808  
H -0.5199 5.2658 1.7723  
H -0.0866 6.0775 0.2614  
C -5.9672 1.0568 -2.5220  
H -5.9957 1.4697 -3.5339  
H -5.5127 1.7649 -1.8247  
H -5.4685 0.0847 -2.5125  
C -7.3851 0.2694 -0.6740  
H -6.8986 0.9982 -0.0221  
H -8.4240 0.1131 -0.3713  
H -6.8442 -0.6788 -0.7010  
C -8.1294 2.1491 -2.0751  
H -8.1101 2.5486 -3.0923  
H -9.1582 1.9605 -1.7582  
H -7.6147 2.8131 -1.3761  
C -8.0648 -0.1418 -3.0021  
H -8.0463 0.2794 -4.0105  
H -7.5053 -1.0791 -2.9513  
H -9.0952 -0.2765 -2.6632  
C -6.7244 -0.9661 2.4041  
H -6.6902 -1.5699 1.4942  
H -7.5641 -1.2544 3.0418  
H -6.7457 0.1025 2.1769  
C -5.4399 -0.4143 4.4273  
H -6.3054 -0.6975 5.0315  
H -4.5116 -0.6219 4.9653  
H -5.4918 0.6359 4.1298  
C -4.2681 -0.8440 2.3118  
H -3.3593 -1.0469 2.8828  
H -4.3159 -1.4549 1.4069  
H -4.3755 0.2214 2.0956  
C -5.3644 -2.7045 3.4864  
H -5.3564 -3.2431 2.5355  
H -4.4409 -2.8820 4.0414  
H -6.2344 -2.9781 4.0887  
N -5.4495 -1.2364 3.1670  
N -7.3923 0.8352 -2.0732

|   |         |         |        |   |         |         |        |
|---|---------|---------|--------|---|---------|---------|--------|
| C | 3.1630  | -0.4727 | 1.6562 | H | -2.2521 | -3.9167 | 3.4970 |
| H | 3.9847  | -0.0843 | 1.0611 | H | -0.6853 | -3.5646 | 4.2611 |
| C | 2.2202  | 0.5310  | 2.1948 | H | -1.9182 | -2.2969 | 4.1576 |
| H | 1.6712  | 0.2932  | 3.1023 | C | 3.4370  | -1.8034 | 2.2666 |
| H | 2.4208  | 1.5866  | 2.0263 | C | 3.6962  | -2.8864 | 1.4116 |
| N | 1.8281  | -0.2316 | 0.9824 | C | 3.4559  | -2.0009 | 3.6533 |
| C | 0.7404  | -1.2573 | 1.0544 | C | 3.9505  | -4.1563 | 1.9380 |
| C | 0.1598  | -1.6137 | 2.4231 | H | 3.6985  | -2.7308 | 0.3346 |
| H | 1.1344  | -2.1568 | 0.5676 | C | 3.7162  | -3.2693 | 4.1812 |
| H | -0.0687 | -0.8719 | 0.4283 | H | 3.2686  | -1.1581 | 4.3148 |
| C | -0.9033 | -2.7115 | 2.2691 | C | 3.9582  | -4.3509 | 3.3248 |
| H | 0.9436  | -1.9643 | 3.1019 | H | 4.1456  | -4.9911 | 1.2673 |
| H | -0.2992 | -0.7236 | 2.8760 | H | 3.7313  | -3.4139 | 5.2599 |
| C | -1.4769 | -3.1499 | 3.6224 | H | 4.1577  | -5.3383 | 3.7366 |
| H | -1.7088 | -2.3516 | 1.6139 | O | 5.7474  | 1.0430  | 2.7804 |
| H | -0.4537 | -3.5785 | 1.7637 | H | 5.3430  | 1.6398  | 2.1335 |

Free Energy: -2982.738596 hartrees

Transition State **TS<sub>27-280H(NMe<sub>4</sub>)<sub>2</sub></sub>**

Imaginary Frequency at -227 cm<sup>-1</sup>

**Cartesian Coordinates**

|    |         |         |         |   |         |         |         |
|----|---------|---------|---------|---|---------|---------|---------|
| Fe | 1.9850  | 0.5299  | -0.7339 | H | 5.9038  | -4.2907 | -2.0671 |
| N  | 0.4621  | 1.9735  | -0.7736 | C | -0.3995 | -4.2676 | -2.5247 |
| N  | 0.6491  | -0.7698 | -1.6484 | H | 0.2617  | -4.5317 | -3.3613 |
| C  | 2.2081  | -2.6200 | -2.0916 | H | -0.1032 | -4.8905 | -1.6680 |
| C  | 1.7845  | 3.8732  | 0.0369  | H | -1.4257 | -4.5375 | -2.7975 |
| C  | 0.9283  | -2.0835 | -1.9629 | C | -2.8029 | -2.1628 | -2.1286 |
| C  | -1.6351 | 2.9594  | -0.6933 | H | -3.3091 | -1.2964 | -2.5706 |
| C  | -1.3318 | -1.9080 | -2.0355 | H | -2.9960 | -3.0103 | -2.7962 |
| C  | -0.7205 | -0.6390 | -1.6863 | C | -3.4256 | -2.4587 | -0.7494 |
| C  | -0.8738 | 1.7560  | -0.9980 | H | -3.2406 | -1.6094 | -0.0766 |
| C  | -0.7290 | 3.8897  | -0.2430 | H | -2.9192 | -3.3196 | -0.2904 |
| C  | -1.4184 | 0.5401  | -1.4137 | C | -4.9541 | -2.7451 | -0.7538 |
| C  | -0.3038 | -2.8111 | -2.1918 | C | -3.1206 | 3.0988  | -0.8194 |
| C  | 0.5796  | 3.2585  | -0.3037 | H | -3.4803 | 2.5433  | -1.6943 |
| C  | 3.0723  | 3.3480  | -0.1149 | H | -3.3844 | 4.1496  | -0.9878 |
| N  | 3.3527  | 2.1068  | -0.6354 | C | -3.8606 | 2.5879  | 0.4319  |
| C  | 3.4249  | -1.9408 | -1.9652 | H | -3.5738 | 1.5433  | 0.6167  |
| N  | 3.5432  | -0.6189 | -1.6027 | H | -3.5320 | 3.1496  | 1.3176  |
| C  | 4.8805  | -0.3195 | -1.6213 | C | -5.4132 | 2.6518  | 0.3630  |
| C  | 5.6498  | -1.4911 | -2.0327 | C | 4.3727  | 5.3810  | 0.7688  |
| C  | 4.7284  | -2.5107 | -2.2246 | C | 5.4156  | 6.2337  | 0.7455  |
| C  | 5.4208  | 0.9029  | -1.2179 | C | 7.0983  | -1.5248 | -2.1370 |
| C  | 4.7272  | 2.0096  | -0.7194 | C | 7.8470  | -2.4394 | -2.7850 |
| C  | 5.3453  | 3.2076  | -0.2031 | H | 3.4678  | 5.7093  | 1.2820  |
| C  | 4.3109  | 4.0565  | 0.1735  | H | 6.3434  | 6.0086  | 0.2272  |
| H  | -2.4988 | 0.5000  | -1.5176 | H | 5.3439  | 7.1999  | 1.2413  |
| H  | 1.7107  | 4.8875  | 0.4176  | H | 7.6277  | -0.7145 | -1.6344 |
| H  | 6.5005  | 0.9959  | -1.2543 | H | 7.4118  | -3.2618 | -3.3454 |
| H  | 2.2596  | -3.6694 | -2.3664 | H | 8.9324  | -2.3607 | -2.7785 |
| C  | 6.8174  | 3.4350  | -0.0678 | O | -6.0253 | 2.2462  | 1.3994  |
| H  | 7.0315  | 3.9953  | 0.8513  | O | -5.9511 | 3.0692  | -0.7015 |
| H  | 7.3671  | 2.4884  | -0.0294 | O | -5.4679 | -2.9757 | 0.3838  |
| H  | 7.2161  | 4.0249  | -0.9068 | O | -5.5693 | -2.7161 | -1.8576 |
| C  | 4.9983  | -3.9383 | -2.5784 | C | -0.9955 | 5.2871  | 0.2243  |
| H  | 4.1644  | -4.5886 | -2.2926 | H | -2.0493 | 5.5496  | 0.0793  |
| H  | 5.1681  | -4.0643 | -3.6582 | H | -0.7632 | 5.3999  | 1.2934  |



|   |         |         |         |   |         |         |         |
|---|---------|---------|---------|---|---------|---------|---------|
| H | -0.3797 | 6.0173  | -0.3193 | N | -7.3613 | 0.2956  | -2.4501 |
| C | -5.9010 | 0.4770  | -2.7907 | C | 4.0308  | -0.3863 | 1.7781  |
| H | -5.8318 | 0.7070  | -3.8572 | H | 4.5195  | -0.1290 | 0.8510  |
| H | -5.5262 | 1.3079  | -2.1880 | C | 2.8707  | 0.4700  | 2.1317  |
| H | -5.3961 | -0.4645 | -2.5620 | H | 2.5292  | 0.3447  | 3.1640  |
| C | -7.4859 | -0.0335 | -0.9823 | H | 3.0842  | 1.5267  | 1.9536  |
| H | -7.0732 | 0.8034  | -0.4148 | N | 1.9024  | -0.0364 | 1.1426  |
| H | -8.5478 | -0.1660 | -0.7579 | C | 0.9911  | -1.0745 | 1.6125  |
| H | -6.9340 | -0.9591 | -0.8045 | C | 0.0406  | -0.6267 | 2.7377  |
| C | -8.1069 | 1.5717  | -2.7415 | H | 1.5559  | -1.9526 | 1.9715  |
| H | -7.9988 | 1.7925  | -3.8066 | H | 0.3989  | -1.4078 | 0.7533  |
| H | -9.1588 | 1.4143  | -2.4896 | C | -0.9412 | -1.7476 | 3.1115  |
| H | -7.6642 | 2.3572  | -2.1236 | H | 0.6191  | -0.3495 | 3.6297  |
| C | -7.9286 | -0.8372 | -3.2648 | H | -0.5092 | 0.2698  | 2.4181  |
| H | -7.8149 | -0.5848 | -4.3221 | C | -1.6563 | -1.4745 | 4.4416  |
| H | -7.3676 | -1.7388 | -3.0072 | H | -1.6727 | -1.8746 | 2.3008  |
| H | -8.9861 | -0.9426 | -3.0091 | H | -0.3918 | -2.6980 | 3.1881  |
| C | -7.1021 | -0.8163 | 2.2969  | H | -2.4070 | -2.2452 | 4.6612  |
| H | -6.9524 | -1.5688 | 1.5187  | H | -0.9323 | -1.4598 | 5.2678  |
| H | -7.9722 | -1.0505 | 2.9160  | H | -2.1556 | -0.4960 | 4.4301  |
| H | -7.1740 | 0.1898  | 1.8768  | C | 4.2147  | -1.7388 | 2.2321  |
| C | -6.0278 | 0.2055  | 4.2564  | C | 5.0081  | -2.6145 | 1.4523  |
| H | -6.9328 | -0.0122 | 4.8292  | C | 3.6189  | -2.2320 | 3.4153  |
| H | -5.1464 | 0.1621  | 4.9008  | C | 5.1922  | -3.9386 | 1.8394  |
| H | -6.0991 | 1.1746  | 3.7563  | H | 5.4547  | -2.2422 | 0.5331  |
| C | -4.6615 | -0.5273 | 2.3506  | C | 3.8119  | -3.5568 | 3.8037  |
| H | -3.7988 | -0.5015 | 3.0184  | H | 3.0136  | -1.5710 | 4.0297  |
| H | -4.5729 | -1.3194 | 1.6034  | C | 4.5957  | -4.4131 | 3.0177  |
| H | -4.8349 | 0.4519  | 1.8994  | H | 5.7951  | -4.6054 | 1.2265  |
| C | -5.7299 | -2.2083 | 3.7917  | H | 3.3507  | -3.9263 | 4.7170  |
| H | -5.6176 | -2.9184 | 2.9688  | H | 4.7401  | -5.4480 | 3.3212  |
| H | -4.8407 | -2.2030 | 4.4265  | O | 5.7938  | 0.8620  | 2.8237  |
| H | -6.6230 | -2.4253 | 4.3832  | H | 5.5403  | 1.6191  | 2.2714  |
| N | -5.8812 | -0.8403 | 3.1841  |   |         |         |         |

Free Energy: --2982.729987 hartrees

Compound **28<sub>OH</sub>(NMe<sub>4</sub>)<sub>2</sub>**  
**Cartesian Coordinates**

|    |         |         |         |   |         |         |         |
|----|---------|---------|---------|---|---------|---------|---------|
| Fe | 2.2696  | 0.3342  | -0.8178 | C | 5.1057  | -0.9312 | -0.8285 |
| N  | 0.9374  | 1.8810  | -1.2781 | C | 5.7804  | -2.2212 | -0.9229 |
| N  | 0.9379  | -0.9456 | -1.8207 | C | 4.8282  | -3.1271 | -1.3722 |
| C  | 2.3822  | -2.9288 | -1.9637 | C | 5.7068  | 0.2706  | -0.4441 |
| C  | 2.3658  | 3.7835  | -0.6472 | C | 5.1128  | 1.5353  | -0.3830 |
| C  | 1.1534  | -2.2798 | -2.0744 | C | 5.7964  | 2.7628  | -0.0298 |
| C  | -1.0925 | 2.9974  | -1.3258 | C | 4.8511  | 3.7755  | -0.1055 |
| C  | -1.0792 | -1.9735 | -2.3210 | H | -2.1093 | 0.5398  | -1.9353 |
| C  | -0.4094 | -0.7301 | -1.9654 | H | 2.3491  | 4.8539  | -0.4646 |
| C  | -0.4100 | 1.7240  | -1.4900 | H | 6.7608  | 0.2250  | -0.1908 |
| C  | -0.1250 | 3.9243  | -1.0163 | H | 2.3801  | -3.9890 | -2.1992 |
| C  | -1.0315 | 0.5113  | -1.8019 | C | 7.2349  | 2.8771  | 0.3646  |
| C  | -0.1012 | -2.9355 | -2.3978 | H | 7.3525  | 3.6122  | 1.1717  |
| C  | 1.1386  | 3.2102  | -0.9834 | H | 7.6380  | 1.9180  | 0.7084  |
| C  | 3.5946  | 3.1337  | -0.4881 | H | 7.8583  | 3.2199  | -0.4752 |
| N  | 3.7902  | 1.7896  | -0.6603 | C | 4.9966  | -4.5966 | -1.5977 |
| C  | 3.6018  | -2.3827 | -1.5455 | H | 4.0354  | -5.1217 | -1.5803 |
| N  | 3.7947  | -1.0603 | -1.2080 | H | 5.4750  | -4.8052 | -2.5665 |

|   |         |         |         |   |         |         |         |
|---|---------|---------|---------|---|---------|---------|---------|
| H | 5.6419  | -5.0297 | -0.8220 | H | -8.8661 | -0.7993 | -2.3535 |
| C | -0.2717 | -4.3952 | -2.6844 | C | -6.0089 | -0.5506 | 2.6510  |
| H | 0.4546  | -4.7478 | -3.4294 | H | -6.1392 | -1.3779 | 1.9486  |
| H | -0.1239 | -4.9984 | -1.7760 | H | -6.6830 | -0.6416 | 3.5065  |
| H | -1.2802 | -4.5999 | -3.0617 | H | -6.1283 | 0.4146  | 2.1532  |
| C | -2.5596 | -2.1738 | -2.4157 | C | -4.3362 | 0.5467  | 4.0892  |
| H | -3.0590 | -1.2457 | -2.7179 | H | -5.0350 | 0.4784  | 4.9269  |
| H | -2.8006 | -2.9248 | -3.1776 | H | -3.3043 | 0.4803  | 4.4423  |
| C | -3.1157 | -2.6308 | -1.0506 | H | -4.4938 | 1.4606  | 3.5107  |
| H | -2.7430 | -1.9549 | -0.2715 | C | -3.6493 | -0.5325 | 1.9875  |
| H | -2.7026 | -3.6201 | -0.8056 | H | -2.6262 | -0.5982 | 2.3634  |
| C | -4.6610 | -2.7268 | -0.9339 | H | -3.8963 | -1.3702 | 1.3304  |
| C | -2.5781 | 3.1780  | -1.3315 | H | -3.8361 | 0.4280  | 1.5041  |
| H | -3.0428 | 2.5695  | -2.1176 | C | -4.3705 | -1.9167 | 3.8819  |
| H | -2.8401 | 4.2215  | -1.5405 | H | -4.5543 | -2.7234 | 3.1683  |
| C | -3.1538 | 2.7619  | 0.0368  | H | -3.3367 | -1.9422 | 4.2339  |
| H | -2.8203 | 1.7397  | 0.2557  | H | -5.0664 | -1.9710 | 4.7226  |
| H | -2.7167 | 3.3884  | 0.8257  | N | -4.5899 | -0.6139 | 3.1641  |
| C | -4.6955 | 2.8041  | 0.1897  | N | -7.1358 | 0.3977  | -2.1194 |
| C | 4.9969  | 5.1976  | 0.1553  | C | 2.9916  | -1.9409 | 2.0682  |
| C | 6.1407  | 5.9104  | 0.1880  | H | 3.2947  | -2.2893 | 1.0721  |
| C | 7.1701  | -2.4446 | -0.5624 | C | 2.8493  | -0.3950 | 1.9994  |
| C | 7.9485  | -3.4870 | -0.9152 | H | 2.6141  | -0.0337 | 3.0146  |
| H | 4.0683  | 5.7406  | 0.3379  | H | 3.8326  | 0.0036  | 1.7130  |
| H | 7.1121  | 5.4694  | -0.0169 | N | 1.8493  | 0.0301  | 1.0420  |
| H | 6.1146  | 6.9762  | 0.4072  | C | 0.5253  | 0.2916  | 1.5906  |
| H | 7.6242  | -1.6730 | 0.0611  | C | 0.4029  | 1.6957  | 2.2136  |
| H | 7.5988  | -4.2869 | -1.5617 | H | 0.2728  | -0.4594 | 2.3556  |
| H | 8.9782  | -3.5430 | -0.5669 | H | -0.2141 | 0.1976  | 0.7854  |
| O | -5.1406 | 2.3709  | 1.2988  | C | -0.9513 | 1.8974  | 2.9024  |
| O | -5.3891 | 3.2370  | -0.7729 | H | 1.2146  | 1.8428  | 2.9415  |
| O | -5.1162 | -2.8375 | 0.2468  | H | 0.5346  | 2.4444  | 1.4231  |
| O | -5.3451 | -2.6888 | -1.9960 | C | -1.1528 | 3.3326  | 3.4028  |
| C | -0.3068 | 5.3767  | -0.7002 | H | -1.7513 | 1.6485  | 2.1948  |
| H | -1.3330 | 5.6955  | -0.9142 | H | -1.0384 | 1.1910  | 3.7421  |
| H | -0.1058 | 5.5794  | 0.3622  | H | -2.1296 | 3.4551  | 3.8901  |
| H | 0.3790  | 6.0052  | -1.2851 | H | -0.3717 | 3.6093  | 4.1250  |
| C | -5.7581 | 0.5366  | -2.7230 | H | -1.1005 | 4.0399  | 2.5635  |
| H | -5.8806 | 0.7609  | -3.7860 | C | 1.6806  | -2.6019 | 2.4401  |
| H | -5.2575 | 1.3609  | -2.2095 | C | 0.8325  | -3.0645 | 1.4244  |
| H | -5.2430 | -0.4170 | -2.5847 | C | 1.2401  | -2.6487 | 3.7714  |
| C | -7.0022 | 0.0818  | -0.6493 | C | -0.4430 | -3.5504 | 1.7271  |
| H | -6.4684 | 0.9077  | -0.1729 | H | 1.1679  | -3.0171 | 0.3922  |
| H | -8.0103 | -0.0123 | -0.2363 | C | -0.0303 | -3.1468 | 4.0796  |
| H | -6.4591 | -0.8616 | -0.5553 | H | 1.8962  | -2.2879 | 4.5608  |
| C | -7.8878 | 1.6925  | -2.2857 | C | -0.8789 | -3.5913 | 3.0567  |
| H | -7.9635 | 1.9055  | -3.3553 | H | -1.0970 | -3.8888 | 0.9264  |
| H | -8.8824 | 1.5640  | -1.8509 | H | -0.3633 | -3.1793 | 5.1158  |
| H | -7.3216 | 2.4690  | -1.7640 | H | -1.8696 | -3.9735 | 3.2948  |
| C | -7.8730 | -0.7236 | -2.8041 | O | 4.0476  | -2.1931 | 3.0214  |
| H | -7.9542 | -0.4782 | -3.8661 | H | 4.1480  | -3.1535 | 3.0840  |
| H | -7.2945 | -1.6381 | -2.6483 |   |         |         |         |

Free Energy: -2982.802932 hartrees

Compound **29**<sub>OH</sub>(NMe<sub>4</sub>)<sub>2</sub>

**Cartesian Coordinates**

|    |         |        |         |   |         |        |         |
|----|---------|--------|---------|---|---------|--------|---------|
| Fe | -2.0915 | 1.2123 | -0.6109 | N | -0.6065 | 2.6687 | -0.4718 |
| N  | -0.8118 | 0.1585 | -1.8599 | C | -1.9154 | 4.4540 | 0.5970  |

|   |         |         |         |   |         |         |         |
|---|---------|---------|---------|---|---------|---------|---------|
| C | -2.3974 | -1.4625 | -2.8115 | H | -7.0665 | 5.8177  | 1.4218  |
| C | -0.7246 | 3.9015  | 0.1332  | H | -8.5920 | 4.7810  | 1.6288  |
| C | 1.1511  | -0.8594 | -2.5586 | O | 4.9112  | -2.5977 | -0.1309 |
| C | 1.4894  | 3.6417  | -0.2826 | O | 5.3195  | -2.0772 | -2.2930 |
| C | 0.7331  | 2.4824  | -0.7238 | O | 5.6092  | 2.6530  | 1.9757  |
| C | 0.5632  | 0.2674  | -1.8591 | O | 5.8169  | 3.8090  | 0.0453  |
| C | 0.1045  | -1.6325 | -3.0084 | C | 0.1807  | -2.9153 | -3.7751 |
| C | 1.2702  | 1.3476  | -1.3332 | H | 1.2046  | -3.0976 | -4.1199 |
| C | 0.5775  | 4.5265  | 0.2449  | H | -0.1218 | -3.7693 | -3.1517 |
| C | -1.1119 | -0.9866 | -2.5665 | H | -0.4832 | -2.8999 | -4.6500 |
| C | -3.5933 | -0.9282 | -2.3307 | C | 6.0137  | 1.2489  | -2.2054 |
| N | -3.6810 | 0.1889  | -1.5350 | H | 6.2269  | 1.6631  | -3.1942 |
| C | -3.1910 | 3.8864  | 0.5321  | H | 5.4102  | 0.3418  | -2.2884 |
| N | -3.4772 | 2.6663  | -0.0460 | H | 5.5512  | 2.0039  | -1.5650 |
| C | -4.8325 | 2.4768  | 0.0766  | C | 7.0591  | 0.2885  | -0.2020 |
| C | -5.4336 | 3.6105  | 0.7665  | H | 6.4175  | -0.5889 | -0.3224 |
| C | -4.3960 | 4.4909  | 1.0481  | H | 8.0190  | 0.0028  | 0.2367  |
| C | -5.5324 | 1.3911  | -0.4509 | H | 6.5838  | 1.0681  | 0.4000  |
| C | -5.0144 | 0.3438  | -1.2147 | C | 8.0081  | -0.1802 | -2.4237 |
| C | -5.8007 | -0.7072 | -1.8177 | H | 8.1810  | 0.2519  | -3.4128 |
| C | -4.9165 | -1.5011 | -2.5353 | H | 8.9587  | -0.4364 | -1.9487 |
| H | 2.3491  | 1.3180  | -1.4424 | H | 7.3417  | -1.0461 | -2.4778 |
| H | -2.4630 | -2.3638 | -3.4126 | C | 8.2013  | 2.0815  | -1.4406 |
| H | -6.6057 | 1.3834  | -0.2943 | H | 8.3880  | 2.4727  | -2.4441 |
| H | -1.8381 | 5.4315  | 1.0633  | H | 7.6605  | 2.8084  | -0.8255 |
| C | -7.2742 | -0.8978 | -1.6481 | H | 9.1394  | 1.7761  | -0.9701 |
| H | -7.5123 | -1.9669 | -1.5762 | C | 5.3644  | -0.6372 | 2.6986  |
| H | -7.6450 | -0.3988 | -0.7462 | H | 5.8428  | 0.3273  | 2.5140  |
| H | -7.8346 | -0.4993 | -2.5071 | H | 5.6086  | -1.0116 | 3.6962  |
| C | -4.4740 | 5.7976  | 1.7714  | H | 5.6203  | -1.3703 | 1.9291  |
| H | -3.5003 | 6.0973  | 2.1734  | C | 3.1618  | -1.7194 | 2.8927  |
| H | -4.8261 | 6.6026  | 1.1092  | H | 3.4645  | -2.0833 | 3.8780  |
| H | -5.1876 | 5.7306  | 2.6031  | H | 2.0888  | -1.5202 | 2.8594  |
| C | 0.8568  | 5.8687  | 0.8464  | H | 3.4613  | -2.4184 | 2.1066  |
| H | 0.1114  | 6.6121  | 0.5351  | C | 3.5137  | 0.0736  | 1.2526  |
| H | 0.8376  | 5.8251  | 1.9456  | H | 2.4325  | 0.2192  | 1.2177  |
| H | 1.8487  | 6.2246  | 0.5448  | H | 4.0523  | 1.0064  | 1.0976  |
| C | 2.9770  | 3.8036  | -0.3396 | H | 3.8396  | -0.6910 | 0.5500  |
| H | 3.4148  | 3.0660  | -1.0206 | C | 3.4607  | 0.6134  | 3.6465  |
| H | 3.2332  | 4.7877  | -0.7526 | H | 4.0077  | 1.5320  | 3.4128  |
| C | 3.6287  | 3.6561  | 1.0571  | H | 2.3810  | 0.7544  | 3.5535  |
| H | 3.1192  | 2.8703  | 1.6251  | H | 3.7184  | 0.2392  | 4.6409  |
| H | 3.4828  | 4.5851  | 1.6269  | N | 3.8742  | -0.4197 | 2.6318  |
| C | 5.1527  | 3.3524  | 1.0184  | N | 7.3279  | 0.8604  | -1.5719 |
| C | 2.6124  | -1.1665 | -2.6511 | C | -3.0900 | -2.6880 | 1.7620  |
| H | 3.2048  | -0.2508 | -2.5469 | H | -3.2580 | -1.7514 | 2.3152  |
| H | 2.8572  | -1.5860 | -3.6340 | C | -2.2258 | -2.3611 | 0.5278  |
| C | 3.0238  | -2.1712 | -1.5500 | H | -2.1093 | -3.2641 | -0.0746 |
| H | 2.5343  | -1.9051 | -0.6077 | H | -2.7584 | -1.6256 | -0.0701 |
| H | 2.6426  | -3.1670 | -1.8118 | N | -0.9064 | -1.8382 | 0.8782  |
| C | 4.5537  | -2.2932 | -1.3110 | C | 0.2156  | -2.7669 | 1.1077  |
| C | -5.1763 | -2.7010 | -3.3131 | C | 0.3515  | -3.8772 | 0.0670  |
| C | -6.3584 | -3.0966 | -3.8243 | H | 0.1520  | -3.2081 | 2.1125  |
| C | -6.8478 | 3.7168  | 1.0834  | H | 1.1232  | -2.1624 | 1.0722  |
| C | -7.5293 | 4.8353  | 1.4004  | C | 1.6088  | -4.7125 | 0.3419  |
| H | -4.3120 | -3.3387 | -3.5021 | H | -0.5178 | -4.5460 | 0.0848  |
| H | -7.2665 | -2.5094 | -3.7211 | H | 0.4079  | -3.4276 | -0.9326 |
| H | -6.4283 | -4.0272 | -4.3840 | C | 1.8103  | -5.8119 | -0.7083 |
| H | -7.4094 | 2.7822  | 1.0530  | H | 2.4890  | -4.0559 | 0.3594  |

|   |         |         |         |
|---|---------|---------|---------|
| H | 1.5246  | -5.1634 | 1.3420  |
| H | 2.7067  | -6.4090 | -0.4951 |
| H | 0.9450  | -6.4892 | -0.7357 |
| H | 1.9247  | -5.3742 | -1.7100 |
| C | -2.4114 | -3.6839 | 2.6790  |
| C | -2.2323 | -5.0165 | 2.2778  |
| C | -1.8661 | -3.2576 | 3.8971  |
| C | -1.5046 | -5.9035 | 3.0746  |
| H | -2.6596 | -5.3494 | 1.3342  |
| C | -1.1326 | -4.1416 | 4.6966  |

|   |         |         |        |
|---|---------|---------|--------|
| H | -2.0026 | -2.2226 | 4.2075 |
| C | -0.9453 | -5.4655 | 4.2831 |
| H | -1.3632 | -6.9331 | 2.7511 |
| H | -0.7065 | -3.7977 | 5.6372 |
| H | -0.3718 | -6.1546 | 4.9001 |
| O | -4.3399 | -3.1760 | 1.2264 |
| H | -4.8947 | -3.4229 | 1.9799 |
| C | -0.7757 | -0.5367 | 1.3153 |
| O | 0.2331  | -0.1311 | 1.9165 |
| O | -1.8090 | 0.2620  | 1.0441 |

Free Energy: -3171.350597 hartrees

Transition State **TS**<sub>29-30Me</sub>  
Imaginary Frequency at -534 cm<sup>-1</sup>  
**Cartesian Coordinates**

|    |         |         |         |
|----|---------|---------|---------|
| Fe | -1.5546 | 0.5843  | -0.4903 |
| N  | -0.0113 | 1.9501  | -0.7722 |
| N  | -0.2785 | -0.8671 | -1.2691 |
| C  | -1.8988 | -2.6839 | -1.5982 |
| C  | -1.2553 | 4.0139  | -0.2862 |
| C  | -0.6040 | -2.1798 | -1.5388 |
| C  | 2.1279  | 2.8351  | -0.7036 |
| C  | 1.6595  | -2.1098 | -1.5258 |
| C  | 1.0964  | -0.7999 | -1.2775 |
| C  | 1.3240  | 1.6435  | -0.8818 |
| C  | 1.2550  | 3.8744  | -0.4848 |
| C  | 1.8343  | 0.3669  | -1.0983 |
| C  | 0.6005  | -2.9691 | -1.7077 |
| C  | -0.0800 | 3.3023  | -0.5140 |
| C  | -2.5566 | 3.5041  | -0.2628 |
| N  | -2.8786 | 2.1805  | -0.4429 |
| C  | -3.0845 | -1.9897 | -1.3461 |
| N  | -3.1539 | -0.6527 | -1.0139 |
| C  | -4.4838 | -0.3592 | -0.8294 |
| C  | -5.2907 | -1.5560 | -1.0334 |
| C  | -4.4049 | -2.5717 | -1.3691 |
| C  | -4.9803 | 0.9040  | -0.5059 |
| C  | -4.2527 | 2.0856  | -0.3456 |
| C  | -4.8253 | 3.3845  | -0.0822 |
| C  | -3.7642 | 4.2812  | -0.0249 |
| H  | 2.9156  | 0.2696  | -1.1146 |
| H  | -1.1388 | 5.0760  | -0.0947 |
| H  | -6.0545 | 0.9843  | -0.3798 |
| H  | -1.9903 | -3.7404 | -1.8282 |
| C  | -6.2839 | 3.6825  | 0.0576  |
| H  | -6.5235 | 4.6429  | -0.4170 |
| H  | -6.9032 | 2.9047  | -0.4015 |
| H  | -6.5762 | 3.7638  | 1.1151  |
| C  | -4.7230 | -3.9897 | -1.7222 |
| H  | -3.9218 | -4.4494 | -2.3106 |
| H  | -4.8698 | -4.6044 | -0.8221 |
| H  | -5.6535 | -4.0387 | -2.3021 |
| C  | 0.6347  | -4.4375 | -1.9914 |
| C  | 2.1254  | -1.0524 | 2.4257  |
| H  | 1.4116  | -2.9034 | 1.6046  |
| H  | 1.1814  | -2.7673 | 3.3550  |
| N  | -0.2158 | -1.7047 | 2.1825  |
| C  | -1.3827 | -2.5830 | 2.2464  |

|   |         |         |         |
|---|---------|---------|---------|
| H | 0.1803  | -5.0101 | -1.1704 |
| H | 0.0738  | -4.6785 | -2.9047 |
| H | 1.6642  | -4.7879 | -2.1196 |
| C | 3.1258  | -2.4079 | -1.5744 |
| H | 3.6359  | -1.9200 | -0.7339 |
| H | 3.2970  | -3.4832 | -1.4631 |
| C | 3.7659  | -1.9272 | -2.8902 |
| H | 3.5329  | -0.8687 | -3.0671 |
| H | 3.3434  | -2.4797 | -3.7420 |
| C | 5.2778  | -2.1084 | -2.9169 |
| C | 3.6220  | 2.8648  | -0.7982 |
| H | 4.0524  | 2.0153  | -0.2531 |
| H | 4.0159  | 3.7741  | -0.3323 |
| C | 4.0903  | 2.8009  | -2.2641 |
| H | 3.6176  | 1.9527  | -2.7785 |
| H | 3.7697  | 3.7020  | -2.8062 |
| C | 5.5986  | 2.6609  | -2.4131 |
| C | -3.7800 | 5.7182  | 0.1909  |
| C | -4.7674 | 6.4434  | 0.7517  |
| C | -6.7389 | -1.5964 | -0.9202 |
| C | -7.5056 | -2.6894 | -0.7385 |
| H | -2.8868 | 6.2540  | -0.1325 |
| H | -5.6777 | 5.9938  | 1.1379  |
| H | -4.6638 | 7.5219  | 0.8523  |
| H | -7.2468 | -0.6332 | -0.9817 |
| H | -7.0870 | -3.6855 | -0.6272 |
| H | -8.5878 | -2.5942 | -0.6761 |
| O | 6.0523  | 2.5611  | -3.6995 |
| O | 6.3972  | 2.6267  | -1.5033 |
| O | 5.9215  | -1.5323 | -3.9765 |
| O | 5.9270  | -2.7149 | -2.0937 |
| C | 1.5688  | 5.3194  | -0.2547 |
| H | 2.6505  | 5.4797  | -0.1939 |
| H | 1.1777  | 5.9442  | -1.0705 |
| H | 1.1143  | 5.6814  | 0.6778  |
| H | 5.3126  | 2.6018  | -4.3282 |
| H | 5.2899  | -1.0703 | -4.5522 |
| C | 1.1406  | -2.2161 | 2.4107  |
| C | -1.1749 | -3.9225 | 1.5307  |
| H | -2.2159 | -2.0417 | 1.7877  |
| H | -1.6369 | -2.7659 | 3.3022  |
| C | -2.5019 | -4.6753 | 1.3796  |

|   |         |         |         |
|---|---------|---------|---------|
| H | -0.7461 | -3.7351 | 0.5413  |
| H | -0.4563 | -4.5415 | 2.0851  |
| C | -2.3330 | -6.0147 | 0.6517  |
| H | -2.9422 | -4.8444 | 2.3734  |
| H | -3.2059 | -4.0380 | 0.8262  |
| H | -3.2928 | -6.5378 | 0.5499  |
| H | -1.9232 | -5.8610 | -0.3560 |
| H | -1.6411 | -6.6707 | 1.1976  |
| C | 2.5062  | -0.3375 | 3.6621  |
| C | 3.4553  | 0.6982  | 3.5867  |
| C | 1.9082  | -0.6165 | 4.9034  |
| C | 3.8210  | 1.4160  | 4.7287  |
| H | 3.8988  | 0.9411  | 2.6237  |
| C | 2.2715  | 0.1030  | 6.0444  |

|   |         |         |        |
|---|---------|---------|--------|
| H | 1.1565  | -1.3983 | 4.9821 |
| C | 3.2322  | 1.1206  | 5.9643 |
| H | 4.5616  | 2.2104  | 4.6529 |
| H | 1.8016  | -0.1283 | 6.9988 |
| H | 3.5138  | 1.6799  | 6.8544 |
| H | 2.6795  | -0.8303 | 1.5256 |
| O | 3.5735  | -2.4668 | 2.7420 |
| C | 4.7863  | -1.9912 | 2.2673 |
| H | 5.1895  | -1.1426 | 2.8674 |
| H | 5.5559  | -2.7895 | 2.2814 |
| H | 4.7340  | -1.6226 | 1.2128 |
| C | -0.2411 | -0.4079 | 1.8204 |
| O | 0.8724  | 0.2080  | 1.8770 |
| O | -1.3424 | 0.1619  | 1.4263 |

Free Energy: -2783.389741 hartrees

Compound **30<sub>OMe</sub>**  
**Cartesian Coordinates**

|    |         |         |         |
|----|---------|---------|---------|
| Fe | -0.7511 | 0.6538  | -0.7656 |
| N  | 0.6442  | 2.0401  | -0.1231 |
| N  | 0.8067  | -0.6403 | -1.2229 |
| C  | -0.5024 | -2.4742 | -2.2109 |
| C  | -0.8548 | 3.9533  | 0.2248  |
| C  | 0.6805  | -1.9186 | -1.7256 |
| C  | 2.5869  | 2.9745  | 0.7212  |
| C  | 2.8496  | -1.7239 | -1.0972 |
| C  | 2.1208  | -0.4997 | -0.8325 |
| C  | 1.9800  | 1.8085  | 0.1123  |
| C  | 1.5961  | 3.9224  | 0.8363  |
| C  | 2.6526  | 0.6291  | -0.2076 |
| C  | 1.9541  | -2.6094 | -1.6525 |
| C  | 0.3862  | 3.3224  | 0.3012  |
| C  | -2.0334 | 3.4311  | -0.3159 |
| N  | -2.1501 | 2.1734  | -0.8560 |
| C  | -1.7566 | -1.8614 | -2.2793 |
| N  | -2.0217 | -0.5831 | -1.8348 |
| C  | -3.3441 | -0.3293 | -2.1137 |
| C  | -3.9546 | -1.5039 | -2.7264 |
| C  | -2.9513 | -2.4576 | -2.8308 |
| C  | -3.9985 | 0.8722  | -1.8365 |
| C  | -3.4633 | 2.0279  | -1.2587 |
| C  | -4.2098 | 3.2285  | -0.9670 |
| C  | -3.3194 | 4.1138  | -0.3697 |
| H  | 3.7020  | 0.5803  | 0.0674  |
| H  | -0.9012 | 4.9604  | 0.6275  |
| H  | -5.0532 | 0.9121  | -2.0870 |
| H  | -0.4405 | -3.4990 | -2.5618 |
| C  | -5.6533 | 3.4565  | -1.2847 |
| H  | -5.8122 | 4.4908  | -1.6159 |
| H  | -6.0066 | 2.7824  | -2.0726 |
| H  | -6.2883 | 3.2997  | -0.3999 |
| C  | -3.0422 | -3.8299 | -3.4158 |
| H  | -2.0648 | -4.1861 | -3.7596 |
| H  | -3.4194 | -4.5514 | -2.6761 |
| H  | -3.7380 | -3.8399 | -4.2644 |
| C  | 2.1911  | -4.0207 | -2.0896 |

|   |         |         |         |
|---|---------|---------|---------|
| H | 1.5243  | -4.7132 | -1.5568 |
| H | 1.9921  | -4.1416 | -3.1636 |
| H | 3.2262  | -4.3235 | -1.8990 |
| C | 4.3075  | -1.9194 | -0.8160 |
| H | 4.5636  | -1.5085 | 0.1687  |
| H | 4.5501  | -2.9870 | -0.7851 |
| C | 5.1760  | -1.2307 | -1.8852 |
| H | 4.8906  | -0.1742 | -1.9839 |
| H | 5.0009  | -1.6893 | -2.8688 |
| C | 6.6683  | -1.2914 | -1.5912 |
| C | 4.0403  | 3.0952  | 1.0628  |
| H | 4.4123  | 2.1557  | 1.4899  |
| H | 4.1928  | 3.8700  | 1.8217  |
| C | 4.8728  | 3.4379  | -0.1876 |
| H | 4.6640  | 2.7188  | -0.9918 |
| H | 4.5833  | 4.4253  | -0.5754 |
| C | 6.3739  | 3.4523  | 0.0654  |
| C | -3.5437 | 5.4665  | 0.1113  |
| C | -4.7264 | 6.0337  | 0.4260  |
| C | -5.3439 | -1.5785 | -3.1467 |
| C | -6.0690 | -2.6969 | -3.3431 |
| H | -2.6481 | 6.0765  | 0.2368  |
| H | -5.6680 | 5.4946  | 0.3712  |
| H | -4.7631 | 7.0648  | 0.7718  |
| H | -5.8424 | -0.6215 | -3.3068 |
| H | -5.6669 | -3.6907 | -3.1666 |
| H | -7.1050 | -2.6286 | -3.6691 |
| O | 7.1525  | 3.6204  | -1.0476 |
| O | 6.9105  | 3.3309  | 1.1482  |
| O | 7.4668  | -0.6492 | -2.4975 |
| O | 7.1806  | -1.8472 | -0.6466 |
| C | 1.7042  | 5.3124  | 1.3803  |
| H | 2.7009  | 5.4926  | 1.7973  |
| H | 1.5241  | 6.0604  | 0.5948  |
| H | 0.9623  | 5.4880  | 2.1715  |
| H | 6.6003  | 3.6980  | -1.8433 |
| H | 6.9319  | -0.2483 | -3.2025 |
| C | -1.1381 | -1.6662 | 1.3051  |

|   |         |         |        |   |         |         |         |
|---|---------|---------|--------|---|---------|---------|---------|
| C | 0.3142  | -1.7374 | 1.7893 | H | -3.3477 | -0.1689 | 0.5630  |
| H | -1.2654 | -2.0709 | 0.3016 | H | -2.8607 | 1.2849  | 1.4445  |
| H | -1.8072 | -2.2020 | 1.9832 | C | -4.9645 | 0.2964  | 2.8104  |
| H | 1.0081  | -1.6081 | 0.9616 | H | -3.6415 | -1.4092 | 2.7058  |
| N | -1.4139 | -0.2075 | 1.3400 | H | -2.9803 | -0.0360 | 3.6122  |
| C | 0.6796  | -2.9692 | 2.5623 | C | -5.7332 | -0.1952 | 4.0437  |
| C | 1.7231  | -3.7788 | 2.0940 | H | -4.8750 | 1.3923  | 2.8385  |
| C | -0.0250 | -3.3457 | 3.7154 | H | -5.5259 | 0.0477  | 1.8974  |
| C | 2.0543  | -4.9625 | 2.7616 | H | -6.7308 | 0.2601  | 4.0977  |
| H | 2.2620  | -3.4809 | 1.1960 | H | -5.8564 | -1.2868 | 4.0149  |
| C | 0.3118  | -4.5211 | 4.3901 | H | -5.1908 | 0.0590  | 4.9649  |
| H | -0.8360 | -2.7205 | 4.0838 | O | -0.6822 | 1.4335  | 2.8819  |
| C | 1.3489  | -5.3340 | 3.9111 | O | 0.4492  | -0.5172 | 2.6209  |
| H | 2.8594  | -5.5907 | 2.3860 | O | -2.3516 | -4.4567 | 0.5617  |
| H | -0.2374 | -4.8090 | 5.2842 | C | -1.1973 | -5.0135 | 0.0855  |
| H | 1.6039  | -6.2538 | 4.4338 | H | -0.8631 | -5.9060 | 0.6673  |
| C | -0.5563 | 0.3453  | 2.3435 | H | -1.2275 | -5.2953 | -0.9936 |
| C | -2.8477 | 0.1931  | 1.4637 | H | -0.3397 | -4.3029 | 0.1839  |
| C | -3.5581 | -0.3149 | 2.7201 |   |         |         |         |

Free Energy: -2783.426423 hartrees

Compound **31<sub>OMe</sub>**  
**Cartesian Coordinates**

|    |         |         |         |   |         |         |         |
|----|---------|---------|---------|---|---------|---------|---------|
| Fe | -0.4818 | -0.6305 | 0.2335  |   |         |         |         |
| N  | 0.7938  | -0.7325 | -1.3856 |   |         |         |         |
| N  | 0.5036  | 1.0750  | 0.8575  | H | -4.9887 | -4.3092 | 0.2028  |
| C  | -1.0253 | 1.7234  | 2.6641  | H | -5.3884 | -4.0728 | -1.5085 |
| C  | -0.1520 | -2.7179 | -2.4844 | C | -3.6461 | 1.6731  | 4.3396  |
| C  | 0.1492  | 1.8653  | 1.9251  | H | -2.7545 | 2.0975  | 4.8150  |
| C  | 2.7284  | -0.5516 | -2.6412 | H | -4.2566 | 2.5039  | 3.9569  |
| C  | 2.0979  | 2.7215  | 1.1501  | H | -4.2289 | 1.1411  | 5.1021  |
| C  | 1.6768  | 1.5798  | 0.3612  | C | 1.0831  | 3.9519  | 3.1907  |
| C  | 1.9426  | 0.0022  | -1.5564 | H | 0.1381  | 4.5105  | 3.1358  |
| C  | 2.0333  | -1.6353 | -3.1234 | H | 1.1385  | 3.5054  | 4.1936  |
| C  | 2.3322  | 1.0833  | -0.7663 | H | 1.9086  | 4.6647  | 3.0904  |
| C  | 1.1443  | 2.9027  | 2.1265  | C | 3.3612  | 3.4890  | 0.9141  |
| C  | 0.8241  | -1.7349 | -2.3262 | H | 3.4655  | 3.7264  | -0.1525 |
| C  | -1.3105 | -2.8866 | -1.7237 | H | 3.3391  | 4.4413  | 1.4532  |
| N  | -1.6487 | -2.1127 | -0.6460 | C | 4.5938  | 2.6786  | 1.3624  |
| C  | -2.0564 | 0.7979  | 2.4648  | H | 4.5900  | 1.6875  | 0.8906  |
| N  | -2.0501 | -0.1936 | 1.5031  | H | 4.5560  | 2.5018  | 2.4474  |
| C  | -3.2254 | -0.8890 | 1.6379  | C | 5.9134  | 3.3719  | 1.0531  |
| C  | -4.0300 | -0.2994 | 2.6975  | C | 4.1017  | -0.0803 | -3.0094 |
| C  | -3.2851 | 0.7544  | 3.2180  | H | 4.1546  | 1.0148  | -2.9921 |
| C  | -3.5897 | -1.9883 | 0.8539  | H | 4.3613  | -0.3986 | -4.0250 |
| C  | -2.8761 | -2.5556 | -0.2033 | C | 5.1351  | -0.6451 | -2.0149 |
| C  | -3.3321 | -3.6622 | -1.0158 | H | 4.8042  | -0.4570 | -0.9842 |
| C  | -2.3545 | -3.8750 | -1.9770 | H | 5.2016  | -1.7374 | -2.1147 |
| H  | 3.2520  | 1.5837  | -1.0537 | C | 6.5282  | -0.0535 | -2.1674 |
| H  | 0.0072  | -3.4145 | -3.3013 | C | -2.2979 | -4.8662 | -3.0373 |
| H  | -4.5546 | -2.4337 | 1.0710  | C | -3.3276 | -5.5631 | -3.5568 |
| H  | -1.1713 | 2.4414  | 3.4652  | C | -5.3431 | -0.7809 | 3.0914  |
| C  | -4.6055 | -4.4198 | -0.8175 | C | -6.2929 | -0.0886 | 3.7499  |
| H  | -4.4501 | -5.4878 | -1.0172 | H | -1.3076 | -5.0530 | -3.4548 |

|   |         |         |         |
|---|---------|---------|---------|
| H | -4.3546 | -5.4189 | -3.2336 |
| H | -3.1522 | -6.2905 | -4.3469 |
| H | -5.5774 | -1.8066 | 2.8032  |
| H | -6.1633 | 0.9513  | 4.0365  |
| H | -7.2436 | -0.5589 | 3.9937  |
| O | 7.4736  | -0.5626 | -1.3187 |
| O | 6.8458  | 0.8158  | -2.9482 |
| O | 7.0318  | 2.5951  | 1.1784  |
| O | 6.0368  | 4.5318  | 0.7269  |
| C | 2.4221  | -2.5701 | -4.2260 |
| H | 3.3639  | -2.2567 | -4.6893 |
| H | 2.5513  | -3.5954 | -3.8510 |
| H | 1.6501  | -2.6056 | -5.0072 |
| H | 7.0921  | -1.2574 | -0.7567 |
| H | 6.7935  | 1.6850  | 1.4213  |
| C | -2.1914 | 2.4582  | -0.8345 |
| C | -0.9410 | 3.2889  | -1.1726 |
| H | -2.1921 | 2.1302  | 0.2059  |
| H | -3.1178 | 3.0120  | -1.0346 |
| H | -0.1060 | 2.9778  | -0.5466 |
| N | -2.0381 | 1.3273  | -1.7462 |
| C | -1.1139 | 4.7772  | -1.0852 |
| C | -0.3180 | 5.5059  | -0.1917 |
| C | -2.0851 | 5.4447  | -1.8463 |
| C | -0.4975 | 6.8856  | -0.0453 |
| H | 0.4312  | 4.9810  | 0.3983  |
| C | -2.2581 | 6.8243  | -1.7107 |
| H | -2.7047 | 4.8828  | -2.5426 |
| C | -1.4677 | 7.5470  | -0.8059 |
| H | 0.1198  | 7.4415  | 0.6579  |
| H | -3.0125 | 7.3368  | -2.3046 |
| H | -1.6095 | 8.6205  | -0.6964 |
| C | -1.2392 | 1.6700  | -2.8066 |
| C | -3.1169 | 0.3520  | -1.9040 |
| C | -4.3771 | 0.9071  | -2.5763 |
| H | -3.3618 | -0.0176 | -0.9067 |
| H | -2.7170 | -0.4863 | -2.4803 |
| C | -5.4547 | -0.1812 | -2.6762 |
| H | -4.7676 | 1.7555  | -1.9967 |
| H | -4.1254 | 1.2797  | -3.5794 |
| C | -6.7452 | 0.3266  | -3.3327 |
| H | -5.0538 | -1.0311 | -3.2486 |
| H | -5.6747 | -0.5593 | -1.6666 |
| H | -7.5005 | -0.4681 | -3.3970 |
| H | -7.1727 | 1.1579  | -2.7547 |
| H | -6.5456 | 0.6914  | -4.3500 |
| O | -1.0642 | 1.0584  | -3.8467 |
| O | -0.6051 | 2.8616  | -2.5445 |
| O | -4.4991 | 3.5939  | 1.6396  |
| C | -3.3486 | 4.3016  | 1.8695  |
| H | -3.1788 | 5.1182  | 1.1272  |
| H | -3.2727 | 4.7437  | 2.8929  |
| H | -2.4453 | 3.6497  | 1.7581  |
| C | 0.2055  | -2.0185 | 3.0219  |
| C | -0.1587 | -3.1040 | 2.0758  |
| H | -0.5545 | -1.3118 | 3.3450  |

|   |         |         |         |
|---|---------|---------|---------|
| H | 1.0096  | -2.2070 | 3.7279  |
| H | -1.1773 | -3.0925 | 1.6953  |
| N | 0.5988  | -1.9043 | 1.5991  |
| C | 2.0347  | -2.0201 | 1.2011  |
| C | 3.0753  | -2.3594 | 2.2687  |
| H | 2.2958  | -1.0469 | 0.7814  |
| H | 2.0737  | -2.7503 | 0.3857  |
| C | 4.4813  | -2.2928 | 1.6519  |
| H | 3.0135  | -1.6341 | 3.0919  |
| H | 2.9014  | -3.3563 | 2.6887  |
| C | 5.5829  | -2.6210 | 2.6673  |
| H | 4.5377  | -2.9880 | 0.8014  |
| H | 4.6417  | -1.2834 | 1.2451  |
| H | 6.5780  | -2.5606 | 2.2067  |
| H | 5.5539  | -1.9186 | 3.5118  |
| H | 5.4525  | -3.6358 | 3.0676  |
| C | 0.4901  | -4.4458 | 2.0450  |
| C | 0.9666  | -5.0739 | 3.2029  |
| C | 0.6210  | -5.0912 | 0.8042  |
| C | 1.5770  | -6.3302 | 3.1230  |
| H | 0.8641  | -4.5754 | 4.1643  |
| C | 1.2377  | -6.3425 | 0.7227  |
| H | 0.2439  | -4.6040 | -0.0933 |
| C | 1.7186  | -6.9638 | 1.8827  |
| H | 1.9433  | -6.8125 | 4.0272  |
| H | 1.3418  | -6.8336 | -0.2428 |
| H | 2.1976  | -7.9390 | 1.8204  |

Free Energy: -3305.216668 hartrees

## 11. References

- [1]. D. Carminati, E. Gallo, C. Damiano, A. Caselli, D. Intriari, *Eur. J. Inorg. Chem.* **2018**, 2018, 5258.
- [2]. C. Damiano, P. Sonzini, D. Intriari, E. Gallo, *J. Porphyr. Phthalocyanines* **2020**, 24, 809.
- [3]. P. Sonzini, N. Berthet, C. Damiano, V. Dufaud and E. Gallo, *Journal of Catalysis* **2022**, 414, 143.
- [4]. H. Ma, S. Liu, H. Wang, G. Li, K. Zhao, X. Cui, F. Shi, *Green Chem.*, **2023**, 25, 2293.
- [5]. M. Cavalleri, C. Damiano, G. Manca, E. Gallo, *Chem. Eur. J.* **2023**, 29, e202202729.
- [6]. C. Damiano, P. Sonzini, G. Manca, E. Gallo, *Eur. J. Org. Chem.* **2021**, 2021, 2807
